# Supplementary material for: Exploring how ward staff engage with the implementation of a patient safety intervention: a UK-based qualitative process evaluation
Source: PubMed Central journal article supplement — BMJ Open. 2017 Jul 13;7(7):e014558. doi: 10.1136/bmjopen-2016-014558 (PMC5541636; doi:10.1136/bmjopen-2016-014558), 2017-07-13
Supplement: bmjopen-2016-014558.draft_revisions.pdf [file bmjopen-2016-014558.draft_revisions.pdf]

# BMJ Open

## Understanding how organisational context affects the implementation of a patient safety intervention: A qualitative process evaluation

|                                 |                                                                                                                                                                                                                                                                                                                                                                                                                                                                                             |
|---------------------------------|---------------------------------------------------------------------------------------------------------------------------------------------------------------------------------------------------------------------------------------------------------------------------------------------------------------------------------------------------------------------------------------------------------------------------------------------------------------------------------------------|
| Journal:                        | <i>BMJ Open</i>                                                                                                                                                                                                                                                                                                                                                                                                                                                                             |
| Manuscript ID                   | bmjopen-2016-014558                                                                                                                                                                                                                                                                                                                                                                                                                                                                         |
| Article Type:                   | Research                                                                                                                                                                                                                                                                                                                                                                                                                                                                                    |
| Date Submitted by the Author:   | 03-Oct-2016                                                                                                                                                                                                                                                                                                                                                                                                                                                                                 |
| Complete List of Authors:       | Sheard, Laura; Bradford Institute for Health Research, Marsh, Claire; Bradford Institute for Health Research<br>O'Hara, Jane; Bradford Institute for Health Research; University of Leeds, Medical Education<br>Armitage, Gerry; University of Bradford Faculty of Health Studies<br>Wright, John; Bradford Institute for Health Research<br>Lawton, Rebecca; University of Leeds, Institute of Psychological Sciences; Bradford Institute for Health Research, Quality and Safety Research |
| <b>Primary Subject Heading</b>: | Health services research                                                                                                                                                                                                                                                                                                                                                                                                                                                                    |
| Secondary Subject Heading:      | Qualitative research                                                                                                                                                                                                                                                                                                                                                                                                                                                                        |
| Keywords:                       | Organisation of health services < HEALTH SERVICES ADMINISTRATION & MANAGEMENT, Quality in health care < HEALTH SERVICES ADMINISTRATION & MANAGEMENT, QUALITATIVE RESEARCH                                                                                                                                                                                                                                                                                                                   |
|                                 |                                                                                                                                                                                                                                                                                                                                                                                                                                                                                             |

SCHOLARONE™  
Manuscripts

only

1  
2  
3  
4 Understanding how organisational context affects the implementation of  
5 a patient safety intervention: A qualitative process evaluation  
6  
7  
8

9  
10 Laura Sheard  
11 laura.sheard@bthft.nhs.uk  
12 Bradford Institute for Health Research, England

13  
14 Claire Marsh  
15 claire.marsh@bthft.nhs.uk  
16 Bradford Institute for Health Research, England

17  
18 Jane O'Hara  
19 jane.o'hara@bthft.nhs.uk  
20 Bradford Institute for Health Research & University of Leeds, England

21  
22 Gerry Armitage  
23 g.r.armitage@brad.ac.uk  
24 University of Bradford, England

25  
26 John Wright  
27 john.wright@bthft.nhs.uk  
28 Bradford Institute for Health Research, England

29  
30 Rebecca Lawton  
31 r.j.lawton@leeds.ac.uk  
32 Bradford Institute for Health Research & University of Leeds, England

33  
34 Corresponding author:  
35 Laura Sheard  
36 Bradford Institute for Health Research  
37 Bradford Teaching Hospitals  
38 Bradford Royal Infirmary  
39 Duckworth Lane  
40 Bradford  
41 BD9 6RJ  
42 England  
43  
44  
45  
46  
47  
48  
49  
50  
51  
52  
53  
54  
55  
56  
57  
58  
59  
60

## ABSTRACT

*Objectives* – The PRASE (Patient Reporting and Action for a Safe Environment) intervention elicits patient feedback on safety and then facilitates ward staff to make action plans to improve patient safety. PRASE was tested on acute hospital wards in a large scale randomised controlled trial. No statistically significant difference between intervention and control wards was found. We conducted a process evaluation of the trial and our aim was to understand how PRASE was implemented by staff across the differing contexts of the 17 intervention wards.

*Design* – Qualitative process evaluation of the implementation of a patient safety intervention, tested in a randomised controlled trial.

*Setting and participants* – NHS staff based on 17 acute hospital wards located at five hospital sites in the North of England.

*Data* – We concentrate on three sources here: i) analysis of taped discussion between ward staff during action planning meetings ii) facilitators' field notes iii) follow up telephone interviews with staff focussing on whether action plans had been achieved.

*Findings* – First, there were palpable differences in the ways that the 17 ward teams engaged with the key components of the intervention. Five main engagement typologies were evident: consistent, partial, upward, downward and disinterested. Second, the intensity of support for the intervention at the level of the hospital management team does not predict the strength of engagement at the level of the individual ward. Third, the standardisation of facilitative processes provided by the research team does not ensure that implementation standardisation of the intervention occurs by ward staff.

*Conclusions* - A dilution of the intervention occurred during the trial because wards engaged with PRASE in divergent ways, despite the standardisation of key components. Facilitative processes were not sufficiently adequate to enable intervention wards to successfully implement PRASE.

## STRENGTHS AND LIMITATIONS OF THIS STUDY

- We devised a process evaluation that had several robust qualitative data collection methods which complemented each other, in order to build a comprehensive and holistic picture of how ward staff implemented the intervention
- Our approach allowed us to reveal how differing organisational contexts can impact on the ability for patient safety changes to be realised at a ward level
- Our novel analytic approach utilised pen portrait methodology in a differing way to how it has previously been used in health services research, in order to document the journey of 17 wards interacting with an intervention over an 18 month period
- Changes in patient safety may have taken longer than the length of the study to come to fruition, but we have little understanding of whether the implementation of PRASE may have gained traction and fuelled subsequent ward based change once the research team left the field
- The qualitative methods we chose were designed to capture a broad understanding of the contexts in which the intervention was implemented but had we known a priori that engagement was such a significant factor, we may have designed the process evaluation to specifically explore its influence.

## BACKGROUND

Measurement of patient safety has traditionally relied on information from staff such as incident reports or recording information about harms such as falls or pressure sores. Recently, patients have been emphasised as being an important detector for patient safety and likened to the 'smoke detectors' of safety [1]. There is an increasing recognition that hospitals need to find better ways to capture and respond to the concerns of patients regarding the quality and safety of their care [2-4]. However, patients are rarely asked about structural or procedural aspects of care which may contribute towards failures in patient safety. The Yorkshire Quality and Safety group have developed a patient safety intervention called Patient Reporting and Action for a Safe Environment (PRASE) which firstly elicits patient perceptions on how a ward is performing on a series of issues which are known to contribute towards patient safety incidents and secondly assists staff to interpret patient feedback to aid service improvements. This paper provides an account of a qualitative process evaluation of a randomised controlled trial (RCT) where PRASE was tested. PRASE was designed [5, 6], piloted [7] and trialled [8, 9] between 2010 and 2015. This period has been charted as an era of paradigm shift for patient safety research when the dominant 'measure and manage' orthodoxy has been enriched by approaches sensitive to context, socio-cultural and political influences [10]. It became essential for a process evaluation to capture the nuances involved in the PRASE implementation.

Process evaluations have been used to explain sub-optimum outcome effects, specifically whether there was a 'fault' with the intervention itself, its key components or with delivery [11]. Latterly, they are often not only concerned with adherence to original plans, but also with broader issues such as unintended consequences or the strengths and weaknesses of the intervention itself [12]. Some process evaluations have been able to identify a precise 'pinch point' or problem with an essential component of the intervention that caused it to fail. In a UK trial of peer led HIV prevention for gay men in London, no effect was shown. A qualitative process evaluation [13] revealed that the essential component of 'peer educator' had not played out as intended during the course of the trial due to recruitment problems and the inability of peer educators to confidently communicate harm reduction messages to intended targets. Other process evaluations have been able to point to more general cultural or structural reasons why an intervention may not have succeeded. Dixon-Woods et al [14] evaluated why a U.S. developed patient safety intervention - regarding decreasing central line infections in intensive care units - struggled with implementation after the intervention was transferred to a U.K. setting. A post-hoc qualitative evaluation revealed multiple reasons why, largely the result of cultural differences between the U.S and U.K. settings. It is clear from these examples that process evaluations can support the largely 'experimental' aim of RCTs by identifying specific 'pinch points' within an intervention itself or within the context that will help to predict success or failure.

The methods of the intervention have been reported in detail elsewhere [8], as have the results of the randomised controlled trial which demonstrated no statistically significant effect between the intervention and control wards [9]. Here, we provide a synopsis of the intervention and results of the trial for the reader to be able to view our process evaluation in context. Appendix 1 provides a summary of the intervention. Appendix 2 describes the content of the above in detail. Appendix 3 describes the trial design and results. Briefly, this was a cyclical study with two phases of i) collecting patient feedback about safety from patients at the bedside ii) collation of this data and ward staff interpreting it iii) ward staff action planning to improve patient safety iv) plans then being implemented and monitored.

## METHODS

We conducted a robust process evaluation involving differing qualitative and quantitative methods [8] which gathered comprehensive data about all 17 intervention wards. The main research question was: 'where does the intervention work, how and why?' In this paper, we have chosen to focus on the 'how?' and 'why?' and present a detailed picture of how staff engaged with the intervention. Six mixed methods were used in the wider process evaluation but due to the extent and depth of the data collected, we focused intensively on three qualitative methods for the purpose of this paper. The methods described below are those most pertinent to exploring how and why staff engaged with the intervention in the ways they did. Data was collected between August 2013 to November 2014. NHS ethical approval was granted in March 2013.

### *1. In depth analysis of taped discussion between ward staff*

Action planning meetings (APMs) were digitally recorded for all 17 wards at both phases. At phase two, one ward did not meet so we considered the recordings of 33 APMs. These ranged in length from 27 to 80 minutes (average 43 minutes). Our examination focused on which areas of patient feedback staff chose to make action plans on and which areas they chose not to. We wrote detailed notes whilst listening to the voice file.

### *2. Facilitator's field notes*

These notes were written shortly after the action planning meeting had finished and captured: i) implicit dynamics between staff, such as body language, tone of voice and other non-verbal cues ii) environmental factors, such as descriptions of the physical space where the meeting was held iii) facilitator's impressions. Field notes were brief and gave a 'snapshot' of the meeting. There were three facilitators across the 17 intervention wards and each facilitator worked with the same wards across both phases of the study, to ensure continuity.

### *3. Follow up telephone interviews conducted with the APM lead*

The purpose of these short, structured phone interviews was to ascertain whether action plans had been successfully implemented or not and why. They were conducted around six months after the APM, with the 'PRASE lead' for each ward. Each ward was responsible for nominating a named member of ward staff - who was part of the action planning meeting - to be the PRASE lead. This could be any member of the team but was more often than not the person who volunteered for the role was a senior nurse. Questioning mainly centred on asking about implementation of each action plan and the context of this.

For the purpose of this paper, we wanted to understand how wards had engaged (or not) with the PRASE intervention. A synthesis of the above data sources has provided us with a rich account of the '**engagement trajectory**' of each ward and this was realised by creating a pen portrait of engagement. Pen portraits have been used previously in applied health research in fields as diverse as: end of life care [15], vulnerable old people being enabled to keep warm in their homes [16] and sleeping practices amongst homeless drug users [17]. Previously, they have provided a narrative account of a 'typical' participant in qualitative studies or as an analytic aide memoir. We used them in a slightly different manner to document the 'journey' of the wards throughout the trial from the perspective of the researcher who had worked closely with these wards for over 18 months. There is a lack of methodological literature pertaining to the construction of a pen portrait and this has been left to the discretion of individual research teams.

We created a basic structure for the pen portraits which centred on the writing of a linear account of how each ward had engaged with relevant key components of the intervention and the contextual factors which influenced this, ensuring that all data sources were drawn upon. We decided not to adhere to a numerical/scale definition of 'engagement' whereby differing wards attained a binary definition of either 'engaged' or 'disengaged' with the

1  
2  
3 intervention. Instead we undertook a more nuanced analysis whereby we assessed the  
4 following intervention components - which staff were responsible for implementing - in terms  
5 of the staff approach taken to: conducting an action planning meeting, creating quality action  
6 plans, implementation of these action plans. The pen portrait for Beech ward is shown in  
7 Appendix 4 with the prose annotated to show where differing sources of data came from.  
8

9  
10 Researchers took into account all the information contained within the pen portrait and  
11 attributed an overall 'engagement trajectory' label to each ward. Author A wrote all pen  
12 portraits for Trusts A and B and Author B for Trust C. We categorised the 17 different ward  
13 engagement trajectories into five main 'engagement typologies', which emerged from an  
14 analytical session centring mainly on consensus discussion between Author A and Author B.  
15 We used techniques derived from 'adaptive theory' [18] which allows for high level  
16 frameworks and conceptualisations to emerge from data rather than descriptive themes.  
17 Adaptive theory proposes a continual engagement between the arising empirical data and  
18 arising theoretical interpretations of the research, working in a continuous cycle with each  
19 cycle generating new explorations.

## 20 FINDINGS

21 We now set out to understand context, circumstance and divergence in the ways in which  
22 the 17 intervention wards engaged with the intervention. In doing so, we aimed to explore  
23 how the intervention may have been interacted with by ward staff in a multiplicity of manners  
24 which made an already complex intervention become hyper complicated in its  
25 implementation phase. This 'hyper complexity' may have served to dilute key elements of the  
26 intervention (which aimed to be standardised across the intervention wards). We explore  
27 three high level themes, which emerged from the data. Firstly, we will describe how there  
28 were palpable differences in the ways that the differing ward teams engaged with the  
29 intervention. Next, we will look at how support for the intervention at the level of the Trust  
30 does not indicate ward level support. Lastly, we will demonstrate that standardisation of  
31 facilitative processes by the research team does not ensure this filters down to  
32 implementation standardisation by ward staff. All quotation extracts are taken from pen  
33 portrait notes and all ward names have been ascribed a pseudonym.  
34

### 35 1. *The same intervention can be interacted with in highly divergent ways*

36 We were able to distinguish the intervention wards into five main 'engagement typologies'  
37 (Figure 1). They are:  
38

- 39 • Consistently engaged throughout (7 wards)
- 40 • Partially engaged throughout (4 wards)
- 41 • Upward engagement as trial progressed (2 wards)
- 42 • Downward engagement as trial progressed (2 wards)
- 43 • Disengaged and disinterested throughout (2 wards)
- 44

45 Consistently engaged – This represents the largest category of how wards chose to  
46 participate in the trial with 7 out of the 17 residing here. These wards were fully signed up to  
47 the ethos of listening to and acting on patient feedback. They took part in a high proportion  
48 of the key components of the cyclical activities and made quality action plans which were  
49 largely implemented in both phases. A quality action plan can be defined as one which seeks  
50 to address issues which the data from patients had identified and was realistic, relatively  
51 timely and more than likely to be achieved. Motivation to take part in the research was high  
52 and improving patient safety was even higher.  
53

54 Partially engaged – These four wards generally did everything asked of them by the  
55 research team and largely participated in intervention components but were sometimes  
56 lacklustre in their motivation towards improving patient safety. At times, it felt like action  
57 planning was just 'going through the motions'. The ability of staff to implement action plans  
58  
59  
60

1  
2  
3 was mixed although this was sometimes due to external factors rather than inertia on the  
4 part of the ward staff themselves.

5  
6 Upward engagement – These two wards began their involvement with the trial in an  
7 ambivalent and – in the case of Maple ward – even hostile manner. However, as the study  
8 progressed and the ward staff began to understand what the research team were trying to  
9 achieve and engagement with the study solidified. The similarity between these two wards  
10 (despite being at different Trusts) is that the turning point for their engagement was  
11 attendance at the peer centred Mid-Point Meeting. This is reflected in Maple ward's  
12 complete U-turn with implementation of quality action plans at phase two as compared with  
13 partial implementation of weak action plans at phase one.

14  
15 Downward engagement – Conversely, another two wards engaged with the study relatively  
16 well at the beginning but, over time, slipped in their level of interest and involvement. Cherry  
17 ward is the only ward across all 17 who did not meet in an APM in phase two. The follow up  
18 telephone interview revealed that the ward manager for Cherry did not believe the study was  
19 a priority. Oak ward had ambitious plans for their phase one action planning but had become  
20 dejected by the amount of time their plan was taking to come into effect. Subsequently, they  
21 declined to make an action plan in the phase two APM and appeared disinterested in the  
22 study.

23  
24 Disengaged and disinterested – Although these two wards met in APMs for both phases of  
25 the trial, they were not interested in using the PRASE data to improve patient safety and  
26 viewed the study as a burden. However, the reasons for this response differed. Rowan were  
27 a low performing ward whose ward manager preferred to concentrate on the other initiatives  
28 rather than our research study. Elm ward were outwardly hostile to the ethos of the study,  
29 critical of the comments their patients had made to researchers and defensive of staff  
30 members. Despite agreeing to hold an APM, they consistently refused to make action plans.

31  
32 Through an examination of these differing engagement trajectories, we can unpick where  
33 parts of the intervention may have led to divergent strategies for local implementation of the  
34 intervention on a ward-by-ward basis. These findings from 'on the ground' implementation by  
35 ward teams directly contradict some of the core assumptions held by the research team at  
36 the outset of intervention development - namely, that by providing facilitative processes,  
37 wards would be able to implement in a uniform manner. It is this aspect of a chasm between  
38 implementation expectations and reality which we now turn our attention to.

## 40 *2. Trust-level support for an intervention does not predict the strength of ward-level 41 engagement*

42 A key assumption was that strong corporate, managerial-level support by the three  
43 participating Trusts would facilitate high-level engagement by wards. However an  
44 examination of the differing types of engagement trajectories, shown in Figure 1, throw doubt  
45 on this assumption and we can find little consistency in engagement style between the  
46 wards at the same Trust. For instance, Trust A is a small district general hospital in a semi-  
47 rural, affluent area. This Trust prides itself on being a forward thinking, cohesive workplace  
48 and senior management support for this intervention was exceptionally strong. However,  
49 when reduced down to the level of the ward, we can see that the four intervention wards at  
50 Trust A are represented across four distinct engagement trajectories (Consistent = Beech,  
51 Upward = Maple, Downward = Oak, Disengaged = Elm). Engagement trajectories for each  
52 of the other two Trusts also differed considerably by ward. The implication here is that  
53 corporate culture - and receptivity to patient feedback at the level of the organisation - is not  
54 a simple predictor of engagement at ward level.

55  
56  
57 Unpicking these differences further, we find that despite a uniform message about the  
58 importance of a multi-disciplinary approach to the study, wards seem to have interpreted this



1  
2  
3 differently. Oak ward convened a strong first multi-disciplinary APG with representatives from  
4 nursing, allied health professionals and support staff. In contrast, on some wards PRASE  
5 remained led and implemented by just one or two nursing staff. For example, Maple's first  
6 APG consisted of just the ward manager and pen portrait notes illustrate why:  
7

8 *A very tense meeting held with just the ward manager who appeared overtly stressed*  
9 *and about to implode. It was clear at this first APM that the ward manager had not*  
10 *understood the purpose of the study and became upset by some of the negative*  
11 *comments which her patients had made in the report. It was a difficult APM to*  
12 *convene as the ward manager thought she had to solve everything by herself and*  
13 *this was partially reinforced by the fact that she had not invited any of her staff to the*  
14 *APM (Maple, Trust A)*  
15

16 The research team never envisaged that the intervention would be taken on by just one or  
17 two members of ward staff and this was actively discouraged throughout but still persisted in  
18 five wards at phase one and six wards at phase two, across the 17 intervention wards. It is  
19 difficult to suggest a clear reason why this happened but it was often related to:

- 20 • Front line context, such as no staff available to be released from direct patient care to  
21 attend APG
- 22 • A minority of ward managers viewing the study as yet another patient safety initiative  
23 that they just needed to 'get on with'
- 24 • A misunderstanding of the multi-disciplinary nature of the intervention.

25 Of most interest is the severe paucity of medical staff involved in the intervention with only  
26 four wards (all at Trust C) involving a medic. This was unforeseen at the outset and may  
27 have contributed to action plans that were narrower in scope than those generated by a  
28 strong MDT. Even those wards who managed to convene a strong multi-disciplinary APG in  
29 phase one were often not able to sustain this level of input going into phase two. Towards  
30 the end of the study, it was disappointing to see that PRASE had unwittingly become badged  
31 as a 'nursing initiative'. Medical and allied health professional input declined over time and  
32 the workload was disproportionally being shouldered by individual Ward Managers  
33 (managerial nurses) who were for the most part already overloaded in their daily clinical  
34 roles.  
35

36 Furthermore, an assumption was that a tight, coherent and most importantly *consistent*  
37 group of staff would engage with the intervention throughout the 14 months of staff  
38 involvement. In reality, staff movement around the NHS estate was high. This led to  
39 difficulties regarding ownership of action planning with some staff reluctant to proceed with  
40 action plans devised by their predecessors and others not believing it was worth the effort to  
41 become involved in the study if they were moving on shortly. A few ward teams changed  
42 their personnel completely between phase one and two of the study due to managerial  
43 reorganisation:  
44

45 *A massive change in staffing took place around the latter part of Phase one with a*  
46 *new Ward Manager and 80-85% change in ward staff. The second phone interview*  
47 *revealed that other ward initiatives were taking place...the whole PRASE process*  
48 *was never wholly embraced because of intense ward improvement work, and staff*  
49 *flux, taking place at the same time (Chestnut ward, Trust C)*  
50  
51

52 It was never anticipated that such wholesale change would take place at the level of the  
53 individual ward teams within the lifetime of the trial and the intervention was unprepared for  
54 this. There was little formal capacity to continually re-introduce PRASE to new ward staff,  
55 despite researchers having to perform this ad hoc and unexpected role. Critically, it points to  
56 ownership of the intervention on the ground as a key factor in success. The implementation  
57  
58  
59  
60

of the intervention becomes weak if it is passed around large numbers of different staff or if staff groups change on a dramatic scale.

3. *Standardisation of facilitative processes by the research team does not necessarily ensure implementation standardisation by ward staff*

A key intention of the facilitative processes was to ensure standardisation of implementation by ward staff. The process evaluation found that, in reality, these uniform training and facilitative processes resulted in little standardisation of approach to action planning regarding a) the issues which staff chose to focus on or b) whether the action plans were successfully implemented (or not). Our pen portraits point to three main issues that appear to underpin why:

- Implementation of action plans were often related to buy in and collegiate working with other departments, some of whom were not willing to spend time, resource and effort on an issue which was not their own
- Existing pan-Trust safety and quality campaigns were prioritised over and above PRASE, to differing degrees which variably helped or hindered PRASE intentions
- Success was often the result of a complex interplay between the personal will of the staff involved in the APG and whether the study fitted into current ward priorities

The following pen portrait excerpt from Apple ward exemplifies the first identified issue regarding buy in from other departments. This ward had several negative comments from patients that pain relief was not being given in a timely manner. To address this, the APG decided they needed assistance from pharmacy but this was not forthcoming and APG members were disappointed. This led to the contradictory position in phase two of engagement still being very present but the act of action planning itself becoming tokenistic:

*This ward stayed engaged with the project the entire way through despite setbacks with their earliest action plan. The ward manager in particular clearly understood the purpose of the study and was sympathetic to receiving patient feedback. However, inertia may have crept in as their 'outside the box' thinking in phase one did not get any buy in from the pharmacy department. Action planning in phase two then became perfunctory even though engagement was still high (Apple, Trust B)*

The second issue of other safety campaigns being prioritised above this study relates to the capacity with which ward staff have within their normal clinical roles to be able to undertake improvement work. In several of the pen portraits, PRASE was described as "just one of many improvement initiatives which this ward are involved in". Wards were under pressure to take part in hospital wide initiatives that executive teams had deemed to be of most importance. Whilst there was senior support for PRASE, it was not always significant in comparison to other initiatives. In some cases, the existence of other high profile campaigns supported staff in achieving their PRASE action plans. Trust C launched a well-received "Hello my name is..." patient experience campaign tying into a national acknowledgement of the need for staff to introduce themselves and communicate better with patients at the bedside. On the wards where PRASE feedback had also drawn attention to this need, staff were supported to respond (through badges, awareness training and senior-support) to do so.

However, the flip-side of attention on more high-profile campaigns meant that – for some wards – PRASE became sidelined. Associated with this was a feeling of patient safety and quality 'fatigue' with the amount of initiatives in this area felt too numerous and therefore burdensome on staff time:

*I got the sense that the ward manager saw PRASE as just another audit which she needed to go through the motions of....At one point during phase two, she admitted that in phase one she did not see the value in the study as she thought it just*

1  
2  
3 *replicated other patient experience measures her ward is involved in. However, now*  
4 *she appreciates how it is different from the other measures... Working out where*  
5 *PRASE fitted in with other initiatives seemed to be a big issue for this ward manager*  
6 *(Pine Ward, Trust B)*  
7

8 One strong finding to emerge was the use of PRASE data to reinforce safety or quality  
9 issues which the ward staff knew about tacitly but did not have robust data about in order to  
10 report to senior management. This finding emerged as a divisive issue. Some wards were  
11 pleased that the PRASE study reinforced staff opinion about the ward or validated on a  
12 larger scale the results of local audits. However, a minority of staff became irritated and  
13 instead chose to view it as duplication.  
14

## 15 **DISCUSSION**

16 As introduced at the outset, some process evaluations are able to reveal specific 'pinch  
17 points' within the intervention itself [13], or within the overall context in which it was applied  
18 [14], which help to explain why no effect was seen. Context (internal and external) is said to  
19 be one of the most important determining factors in whether interventions are able to show  
20 an impact or deliver progress [19]. Our process evaluation found that context was so varied  
21 within the intervention group that this led to a general 'dilution' of intervention  
22 implementation. We found striking differences in the culture, working arrangements and  
23 issues facing individual wards (even within the same Trust), and significantly, changes to  
24 these contexts over time. The in-depth analysis of what happened within the intervention  
25 group generates useful insights for implementation of patient safety initiatives, to which we  
26 will now turn our attention.  
27

28 The improvement of patient safety is already acknowledged as a cultural issue and the  
29 importance of factors such as teamwork, leadership and organizational processes operating  
30 at and between multiple levels [20]. Navigating this territory - particularly the link between  
31 'sharp end' ward safety initiatives and 'blunt end' corporate planning - has been documented  
32 as a necessary challenge. Initiatives which do not pay adequate attention in this regard are  
33 at best destined to fail, and at worst may over-burden already de-motivated staff [21]. The  
34 facilitative processes incorporated into PRASE were designed to help address this  
35 challenge. The assumption was that by providing these processes - access to senior  
36 management at regular intervals and assistance in interpreting patient feedback - staff would  
37 be better placed to successfully navigate this complex organizational territory. It was  
38 anticipated this would allow some uniformity amongst the intervention group. In actuality, the  
39 facilitative processes were not adequate to ensure any such uniformity.  
40

41 Context inside an organisation is said to have a powerful effect on the delivery and adoption  
42 of an intervention [19]. In this study, the relationships between different parts and levels of  
43 the organization from senior management to ward teams to individuals were vital in  
44 achieving success. When these levels align well, as they appeared to do in one Trust - with  
45 respect to a culture shift around introducing and communicating to patients via an external  
46 patient experience campaign - it appears that much can be achieved. When they do not -  
47 e.g. Apple ward who did not get buy in from the pharmacy department - staff at the ward  
48 level can become frustrated and demotivated. We therefore question the capacity of an  
49 externally designed intervention, even one with significant resources and facilitative  
50 processes, to provide the mechanisms to be continually adaptive to the organisational  
51 alignment between the sharp and blunt end at differing institutions. The challenges revealed  
52 here are about deeper organizational culture, systems and processes that need longer-term  
53 development.  
54

55 Our findings support the growing understanding that emphasis in patient safety research  
56 must continue to shift from the measure and manage orthodoxy of data collection to  
57 interpretation and process [10]. In this research, the collection of patient feedback was the  
58  
59

1  
2  
3 least problematic element. The complexity of what staff are being asked to do in  
4 interventions like PRASE (navigating multi-layered organizational systems to implement  
5 improvements) requires much more consideration. In the broader but related policy area of  
6 patient experience, the overt emphasis and huge resource allocated to collecting patient  
7 experience data has not been matched by efforts to utilise and evaluate the impact of  
8 feedback on service improvement [22]. There is increasing recognition that using data  
9 sources to change practice demands creativity and skills from staff; hence the tendency to  
10 present staff with data and expect change to happen as a result [23]. Our intervention  
11 considered these issues a priori and hence facilitative processes were built into the trial yet  
12 they were not sufficiently robust enough to ensure a standardised implementation across  
13 intervention wards.

14  
15 One interpretation of PRASE could be that it 'failed' due to showing no effect between the  
16 intervention and control wards. We believe this a simplistic view which does not take into  
17 account the wealth of positive benefits which patients and staff gained. Firstly, it showed that  
18 patients are able to give feedback about the safety and quality of care and that they want to  
19 do this en masse (our consent rate was 85% of those patients approached by researchers).  
20 Secondly, the process evaluation showed that most staff *do* believe the patient voice is  
21 important and there is an imperative to listen to, and act on, this voice. Thirdly, despite local  
22 struggles, most staff do want to action plan to improve their patients' care. An additional gain  
23 which some staff identified was the ability of the patient feedback to allow staff to understand  
24 not only the patient perspective but also their priorities and to visualise the ward environment  
25 and systems 'through the eyes of the patient'.  
26

### 27 *Limitations*

28 The qualitative data was collected during the life course of the trial and this raises important  
29 points about whether positive attitudes towards patient involvement in patient safety would  
30 continue and even strengthen on the intervention wards after the trial was completed.  
31 Improvements that staff were working towards may have gained impetus since the research  
32 team left. Equally, involvement in the trial may have kick-started ideas which, although did  
33 not come to fruition within its life span, may now be fuelling ward level action. Conversely,  
34 staff may have felt disempowered to enact improvement to the ward environment if their  
35 PRASE action plans had floundered. We have no format for measuring this 'after effect' –  
36 either positive or negative – and little scope for knowing at what time point the evidence of a  
37 more long lasting effect may be captured.  
38

39 Our pen portrait methodology is a culmination of all sources of qualitative data collected and  
40 has its inherent weaknesses. This methodology is still in its relative infancy in relation to the  
41 way in which we have utilised it here. We were careful to draw equally on all sources of data  
42 in order to build a comprehensive narrative of the engagement trajectory of each ward.  
43 However, a differing analysis paying attention to fewer sources or an unequal weighing of  
44 sources may have pulled the narrative account in a slightly different direction. Further, it was  
45 difficult to categorise some wards firmly into their allocated engagement typology and  
46 arguably some could fit into several. Finally, process evaluation methods were developed a  
47 priori to the start of the trial so the design was very open. We devised a loose structure to  
48 capture qualitative intelligence on key trial processes. If prior knowledge existed that  
49 diversity of engagement within the intervention wards was to be so significant, it may have  
50 been possible to target a particular process evaluation framework for analysing outcomes in  
51 relation to this diversity, such as the 'diffusion of innovation model' [24]. It is a possibility that  
52 utilisation of differing methods may have provided other answers as to where different  
53 elements of the intervention worked, for whom and why.  
54  
55  
56  
57  
58  
59  
60

## CONCLUSION

Whereas previous process evaluations point towards specific pinch points or broader cultural issues to understand why an intervention showed no effect, this study points to an overall 'dilution effect' of the intervention. This was largely due to wards interacting with the intervention in highly divergent manners despite the standardisation of key components by the research team. Other factors of importance were facilitative processes being inadequate in order to fully embed the intervention in its setting and context. A disconnect existed between senior management support for the study and how ward staff on the ground engaged with it more locally. The above findings assist in explaining why the trial saw no effect between intervention and control wards.

## DECLARATIONS

### *Funding*

This study was funded by the National Institute for Health Research under its Programme Grants for Applied Research scheme ('Improving patient safety through the involvement of patients', RP-PG-0108-10049). The views expressed are those of the authors and not necessarily those of the NHS, the NIHR or the Department of Health

### *Competing interests*

The authors declare they have no competing interests

### *Authors' contributions*

RL, GA and JW are grant holders of the programme grant. LS devised the methodology of the process evaluation and wrote the qualitative protocol, with assistance from CM. LS, CM and JOH all collected data. LS and CM analysed and interpreted all data, with intellectual input from GA. LS and CM co-wrote the first draft of the paper. All authors edited the first draft of the paper. All authors read and approved the final manuscript.

### *Ethics approval and consent to participate*

The study was approved by South Yorkshire NHS Research Ethics Committee on 15<sup>th</sup> March 2013 (Ref: 13/YH/0077). All participants gave informed consent to take part in this study.

### *Acknowledgements*

Thanks for Gemma Louch, Jane Heyhoe and Yvonne Birks for research assistance in conducting some of the telephone interviews

## REFERENCES

1. Bacon N. A smoke-alarm for patient safety and healthcare quality. Neil Bacon Blog2010 [Web Log]. Retrieved June 2015. <http://neilbacon.wordpress.com/2010/12/13/a-smoke-alarm-for-patient-safety-and-healthcare-quality/>
2. Francis R: Report of the Mid Staffordshire NHS Foundation Trust Public Inquiry. London: The Stationery Office; 2013.
3. Berwick D: Improving the safety of patients in England. London: Department of Health; 2013.
4. Keogh B: Review into the quality of care and treatment provided by 14 hospital trusts in England: overview report. London: Department of Health; 2013.
5. Giles S, Lawton R, Din I, McEachan R: Developing a patient measure of safety (PMOS). *BMJ Quality & Safety* 2013, 22:554-562.
6. McEachan R, Lawton R, O'Hara J, Armitage G, Giles S, Parveen S, Watt I, Wright J, Yorkshire Quality and Safety Research Group: Developing a reliable and valid patient measure of safety in hospitals (PMOS): a validation study. *BMJ Quality & Safety* 2014, 23:565-573.
7. O'Hara J, Lawton R, Armitage G, Sheard L, Marsh C, Cocks K, McEachan R, Reynolds C, Watt I, Wright J. The Patient Reporting and Action for a Safe Environment (PRASE) Intervention: A feasibility study. In press with *BMC Health Services Research*
8. Sheard L, O'Hara J, Armitage G, Wright J, Cocks K, McEachan R, Watt I, Lawton R. Evaluating the PRASE patient safety intervention-a multi-centre, cluster trial with a qualitative process evaluation: study protocol for a randomised controlled trial. *Trials*, 2014, 15: 420.
9. Lawton et al. Can patient involvement improve patient safety? A cluster randomized control trial of the Patient Reporting and Action for a Safe Environment (PRASE) Intervention. In press with *BMJ Quality & Safety*
10. Lamont T & Warring J. Safety lessons: shifting paradigms and new directions for patient safety research *Journal of Health Services Research and Policy* 2015, 20 (15) 1-8
11. Oakley A, Strange V, Bonell C, Allen E, Stephenson J, RIPPLE Study Team: Process evaluation in randomised controlled trials of complex interventions. *BMJ* 2006, 332:413-416.
12. Grant A, Treweek S, Dreischulte T, Foy R, Guthrie B. Process evaluations for cluster randomised trials of complex interventions: a proposed framework for design and reporting. *Trials*, 2013, 14:15
13. Elford J, Sherr L, Bolding G, Serle F, Maguire M. Peer led HIV prevention among gay men in London: process evaluation *AIDS care* 2002, 14 (3) 351-360
14. Dixon-Woods M, Myles L, Tarrant C, Bion J. Explaining Matching Michigan: an ethnographic study of a patient safety program *Implementation Science* 2013, 8:70
15. Pleschberger S, Seymour J, Payne S, Deschepper R, Onwuteaka-Philipsen B, Rurup M. Interviews with end of life care for older people: reflections on six European studies *Qualitative Health Research* 2011, 21 (11) 1588-1600

- 1  
2  
3 16. Tod A, Lusambili A, Homer C, Abbott J, Cooke J, Stocks A, McDaid K. Understanding the  
4 factors influencing vulnerable older people keeping warm and well in winter: a qualitative  
5 study using social marketing techniques. *BMJ Open* 2012  
6  
7 17. Nettleton S, Neale J, Stevenson C. Sleeping at the margins: a qualitative study of  
8 homeless drug users who stay in emergency hostels and shelters. *Critical Public Health*  
9 2012, 22 (3) 319-328  
10  
11 18. Layder D: *Sociological Practice: Linking Theory and Research*. London: Sage; 1998.  
12  
13 19. Health Foundation. *Perspectives on Context*, 2014, London, Health Foundation  
14  
15 20. Taylor S, Dy S, Foy R, Hempel S, McDonald K, Ovretveit J. What context features might  
16 be important determinants of effectiveness of patient safety practice interventions? *BMJ*  
17 *Quality & Safety*, 2011, 20: 611-617  
18  
19 21. Dixon-Woods M, Baker R, Charles K, Dawson J, Jerzembek G, Martin G et al. Culture  
20 and behaviour in the English National Health Service: an overview of lessons from a large  
21 multi method study. *BMJ Quality & Safety* 2014, 23, 106-115  
22  
23 22. Coutler, A. et al. (2014). Collecting data on patient experience is not enough: they must  
24 be used to improve care. *BMJ*, doi: <http://dx.doi.org/10.1136/bmj.g2225/>  
25  
26 23. Gkeredakis, E. et al. Mind the Gap: understanding utilisation of evidence and policy in  
27 health care management practice. *Journal of Health Organization and Management*, 2011,  
28 25(3), pp. 298-314.  
29  
30 24. McMullen H, Griffiths C, Leber W, Greenhalgh T. Explaining high and low performers in  
31 complex intervention trials: a model based on diffusion of innovations theory. *Trials*, 2015,  
32 16: 242  
33  
34  
35  
36  
37  
38  
39  
40  
41  
42  
43  
44  
45  
46  
47  
48  
49  
50  
51  
52  
53  
54  
55  
56  
57  
58  
59  
60

**Appendix 1- Intervention summary**

| <b>Cyclical Activities</b>                                                                                                                                                                                                                                                                                                                                           | <b>Facilitative Processes</b>                                                                                                                                                                                                               | <b>Anticipated outcomes</b>                                                                                                                                                                                 |
|----------------------------------------------------------------------------------------------------------------------------------------------------------------------------------------------------------------------------------------------------------------------------------------------------------------------------------------------------------------------|---------------------------------------------------------------------------------------------------------------------------------------------------------------------------------------------------------------------------------------------|-------------------------------------------------------------------------------------------------------------------------------------------------------------------------------------------------------------|
| <pre> graph TD     A[Patient Measurement Tool of patient safety] --&gt; B[Measurement of ward safety]     C[Patient Reporting Tool of patient safety] --&gt; B     B --&gt; D[Feedback to wards]     D --&gt; E[Interpretation in Action Planning Meeting]     E --&gt; F[Implementation of actions &amp; monitoring]     F --&gt; A     F --&gt; C           </pre> | <p>Trust-level sign up</p> <p>'Independent' collection of patient feedback on safety by research team</p> <p>'Independent' production of feedback reports by research team</p> <p>Ward peer training</p> <p>Facilitated action planning</p> | <p>Improvements in patient safety at a ward level measurable by:</p> <p>Routinely collected data e.g. Patient Safety Thermometer</p> <p>PRASE measures</p> <p>Staff patient safety culture staff survey</p> |

**Appendix 2: Content of key intervention components**

| <b>Cyclical Activities</b>                                                                                                                                                                                                                                                                                                                                                                                                                                                                                                                                                                                                                                                                                                       | <b>Facilitative Processes</b>                                                                                                                                                                                                                                                                                                                                                                                                                                                                                                                                                                                                                                                                                                                                                                                                                                                                                                                                                                                                                                                                                                                                | <b>Anticipated Outcomes</b>                                                                                                                                                                                                                                                                                                                                                               |
|----------------------------------------------------------------------------------------------------------------------------------------------------------------------------------------------------------------------------------------------------------------------------------------------------------------------------------------------------------------------------------------------------------------------------------------------------------------------------------------------------------------------------------------------------------------------------------------------------------------------------------------------------------------------------------------------------------------------------------|--------------------------------------------------------------------------------------------------------------------------------------------------------------------------------------------------------------------------------------------------------------------------------------------------------------------------------------------------------------------------------------------------------------------------------------------------------------------------------------------------------------------------------------------------------------------------------------------------------------------------------------------------------------------------------------------------------------------------------------------------------------------------------------------------------------------------------------------------------------------------------------------------------------------------------------------------------------------------------------------------------------------------------------------------------------------------------------------------------------------------------------------------------------|-------------------------------------------------------------------------------------------------------------------------------------------------------------------------------------------------------------------------------------------------------------------------------------------------------------------------------------------------------------------------------------------|
| <p>The key activities that comprise PRASE are the measurement of patient feedback using two tools. The first is the Patient Measure of Organisational Safety – PMOS - a 44-item questionnaire which asks patients at the hospital bedside about safety concerns and issues [5, 6]. The second is a reporting proforma for patients to provide detailed safety incidents or positive experiences [7]. The questionnaire items are theoretically-informed from a systems understanding of patient safety whereby experience of care is understood to arise from a complex interaction of factors that include staff team-working and access to resources as well as more traditionally-considered factors such as the physical</p> | <p>The design of PRASE recognises that ward staff need support to implement the intervention. An understanding of the facilitative processes required was derived from a pilot study where the intervention was tested on six wards at a medium-sized Teaching hospital, prior to finalising its design [7]. Specific facilitative processes involved are:</p> <ul style="list-style-type: none"> <li>- Independent collection of patient feedback by the research team to enable not only objectivity but from a resource and logistics viewpoint as ward staff do not have the capacity to collect this data themselves</li> <li>- Independent production of feedback reports by research team</li> <li>- Negotiation with senior management by the research team to embed the intervention into usual practice</li> <li>- Ward staff training in interpretation of data and role playing of optimum action planning to enable them to tackle systemic issues effectively</li> <li>- Facilitation of the action planning meetings by a senior researcher to i) convene the meeting ii) encourage ward staff to devise action plans which tackle</li> </ul> | <p>It was hypothesized that the intervention would lead to safety improvements in terms of both ward culture and ward performance (distal outcomes) alongside a development of a shared, collaborative understanding of the patient's perspective of safety (proximal outcomes). For more detail on this, see Figure 2: Logic Model, which outlines the programme theory of the PRASE</p> |



|                                                                                                                                                                                                                                                                                                                                                                                                                                                                                                       |                                                                                                                                                                                                                                                                                                                                                                                                                         |                                           |
|-------------------------------------------------------------------------------------------------------------------------------------------------------------------------------------------------------------------------------------------------------------------------------------------------------------------------------------------------------------------------------------------------------------------------------------------------------------------------------------------------------|-------------------------------------------------------------------------------------------------------------------------------------------------------------------------------------------------------------------------------------------------------------------------------------------------------------------------------------------------------------------------------------------------------------------------|-------------------------------------------|
| <p>environment. After patient feedback has been collected it is collated and presented in a feedback report to each ward. Ward staff are then asked to interpret this feedback to identify and target areas for improvement. A multi-disciplinary team (MDT) approach is considered essential for enabling the root causes of, often systemic and complex, issues to be effectively addressed. Finally they are asked to implement agreed action plans and monitor progress in a cyclical manner.</p> | <p>systemic issues and discourage concentration only on short-term, simple solutions where this would be inappropriate to do so<br/>-Motivation of staff and cross team learning and support via the format of three pan Trust meeting involving representatives from the hospital executive team (Start Up meeting pre-trial, Mid-Point meeting half way through trial, Closing meeting after trial has concluded)</p> | <p>intervention.<br/>(see Appendix 5)</p> |
|-------------------------------------------------------------------------------------------------------------------------------------------------------------------------------------------------------------------------------------------------------------------------------------------------------------------------------------------------------------------------------------------------------------------------------------------------------------------------------------------------------|-------------------------------------------------------------------------------------------------------------------------------------------------------------------------------------------------------------------------------------------------------------------------------------------------------------------------------------------------------------------------------------------------------------------------|-------------------------------------------|

**Appendix 3: Trial design and results**

| <b>Trial design</b>                                                                                                                                                                                                                                                                                                                                                                                                                                                                                                                                                                                                                                                                                                                                                                                                                                                                                                                                                                                                                                                                                                                                                                                     | <b>Trial results</b>                                                                                                                                                                                                                                                                                                                                                                                                                                                                                                                                                        |
|---------------------------------------------------------------------------------------------------------------------------------------------------------------------------------------------------------------------------------------------------------------------------------------------------------------------------------------------------------------------------------------------------------------------------------------------------------------------------------------------------------------------------------------------------------------------------------------------------------------------------------------------------------------------------------------------------------------------------------------------------------------------------------------------------------------------------------------------------------------------------------------------------------------------------------------------------------------------------------------------------------------------------------------------------------------------------------------------------------------------------------------------------------------------------------------------------------|-----------------------------------------------------------------------------------------------------------------------------------------------------------------------------------------------------------------------------------------------------------------------------------------------------------------------------------------------------------------------------------------------------------------------------------------------------------------------------------------------------------------------------------------------------------------------------|
| <p>PRASE was trialled within a multi-centre, cluster, randomised controlled design. The study was undertaken across 33 hospital wards in three NHS Trusts (five hospital sites). Seventeen wards were randomly assigned to an intervention group and 16 wards to a control group. Feedback was collected from approximately 25 patients per ward, collated and fed back to staff for interpretation and action planning. This whole process was then repeated in a second cycle so staff were able to see changes to feedback over time.</p> <p>The study was powered to detect a small to medium difference (0.3) between the intervention and control groups with respect to a Primary Outcome which was the Patient Safety Thermometer (PST). PST data is routinely collected from every ward in England on a monthly basis and reports on harm free care associated with: i) pressure ulcers, ii) venous thromboembolisms, iii) catheter associated urinary tract infections and iv) falls. PMOS was chosen as a secondary outcome. This was obtained twice from the intervention wards within their intervention cycles. It was also taken at the same three time points in the control wards.</p> | <p>No significant effect of the intervention between the allocation groups was found for either of the primary outcomes PST (p=0.98) or PMOS (p=0.09) at 6 or 12 months, nor other secondary outcomes. However, a post hoc analysis on new harms (contained in the PST) found a non-significant increase in harm free care of 1.60 for intervention wards over control wards. All wards were retained throughout the trial. Patient response rate for completing the PMOS tool was 86%. Considerable further detail about the trial results can be found elsewhere [9].</p> |

#### Appendix 4 - Beech ward pen portrait

Facilitator's field notes

**Phase one** – This ward manager (WM) is exceptionally open to receiving patient feedback, wants to improve patient safety and experience on the ward and convened a small group of staff to discuss the feedback report. However, the other staff had not read the report and had been “pulled off” the ward to attend the meeting. The ward manager was engaged with the process but was very pressed for time and had accidentally double booked himself between the PRASE meeting and an infection control meeting. WM remarked that he had found the PRASE data useful and he listened to the opinion of his staff members when they put forward suggestion for change.

Taped APM discussion

The APG ended up making quite a lot of discussion about what looks on the surface to be not a lot of data i.e. little context to guide PMOS scores. Despite a lively discussion, one of action plans was a quick fix – to put boards up in the bays which showed staff photos with names and to have a board which shows all the different colour tunics.

Follow up phone interviews

The follow up phone interview found that this action plan had been achieved but that was due to a Trust wide initiative being implemented about the same issue rather than any effort on behalf of the ward.

Taped APM discussion

The other action plan was more far reaching and related to noise at night and re-educating staff to be quiet on the night shift. The WM intended to use the PRASE data from patients to let staff know how much noise at night bothered the patients and kept them awake during the night.

Follow up phone interviews

Instead of trying to enact this cultural change, the WM stated in the phone interview that he had found this too difficult and instead had ordered soft closing bins, checked the doors for soft closing and had looked into muting the buzzers (but had not done this as it created another patient safety problem). The WM noted in his phone interview that he found the orientation meeting useful and fully understood the aims and purpose of the study and his role in it as a result of attending this meeting. He also noted that some staff on the ward were aware of the study but it was hard to engage the majority of staff

Facilitator's field notes

**Phase two** – This APM was with just the WM who remained very enthusiastic towards the study and engaged with it on a personal level. The WM explained that he had wanted other staff to be at this APM but the ward was very short staffed that day. The WM had read the report carefully and thoughtfully and had already come up with several action plans which he wanted to enact as a result of the phase two data. His mood was very positive towards the study and he mentioned several times that he very much valued getting data back from his patients. The WM even said that he had been comparing the comments made in the feedback report with the comments made by patients in the Friends and Family test.

Taped APM discussion

The WM identified that the main issue was still noise at night and he decided to develop a newsletter to go out to all staff about the implications of noise at night for patients.

Follow up phone interviews

In the phone interview, the WM said that other priorities have led to this one sliding and that the Trust is more interested in cannulas and pressure sore prevention at the moment. This WM seems to really want to sort this issue out but is being prevented by external pressure from management to focus on other issues.

Taped APM discussion

The two other substantive action plans made were about contacting estates to see if something can be done about temperature extremities (this was achieved although unsure if estates had been out to rectify it) and to ask people at the senior sisters meeting what other wards were doing about when patients did not know who their consultant was. The latter had not been

Follow up phone interviews

1  
2  
3 done as the last two senior sisters meetings had been cancelled. The WM  
4 further reflected whether it was just down to patients forgetting who their  
5 consultant was.

6  
7 Follow up phone  
8 interviews

9 The WM attended the midpoint meeting and stated in the phone interview that  
10 he found it really useful. Part of this was having the Chief Nurse there and  
11 being able to discuss some of the problems which had been verified by the  
12 study directly with her. It was felt that having such a high level input was really  
13 good as it is rare that this happens. When asked about staff engagement with  
14 PRASE, the WM said that the study is regularly mentioned at staff briefings  
15 and there are numerous posters up. He feels confident that all the sisters  
16 know about the study but isn't sure about staff nurses and HCAs. He had a  
17 clear understanding of the study and why this was an important issue. He  
18 remarked to the phone interviewer that taking part in the study and receiving  
19 the patient feedback had been "invaluable" to him and praised the study  
20 design, methods, senior research fellows and fieldworkers.

21 **Engagement profile:** This ward is led by a nurse who is exceptionally well engaged with the  
22 study on a personal level and completely understands the aim and purpose of it. He  
23 attended every meeting asked of him and contributed heartily to them. However, the action  
24 plans made were – at times – weak and partially unrealised. **Engagement strong**  
25 **throughout, despite setbacks in action planning.** It is useful to state that engagement  
26 may have been consistently strong as the ward manager himself had a clear interest in  
27 improving patient safety, quality and experience and took part in all study components due to  
28 a personal interest.  
29  
30  
31  
32  
33  
34  
35  
36  
37  
38  
39  
40  
41  
42  
43  
44  
45  
46  
47  
48  
49  
50  
51  
52  
53  
54  
55  
56  
57  
58  
59  
60

1  
2  
3  
4  
5  
6  
7  
8  
9  
10  
11  
12  
13  
14  
15  
16  
17  
18  
19  
20  
21  
22  
23  
24  
25  
26  
27  
28  
29  
30  
31  
32  
33  
34  
35  
36  
37  
38  
39  
40  
41  
42  
43  
44  
45  
46  
47  
48  
49

### Appendix 5 - Logic Model: The PRASE Intervention

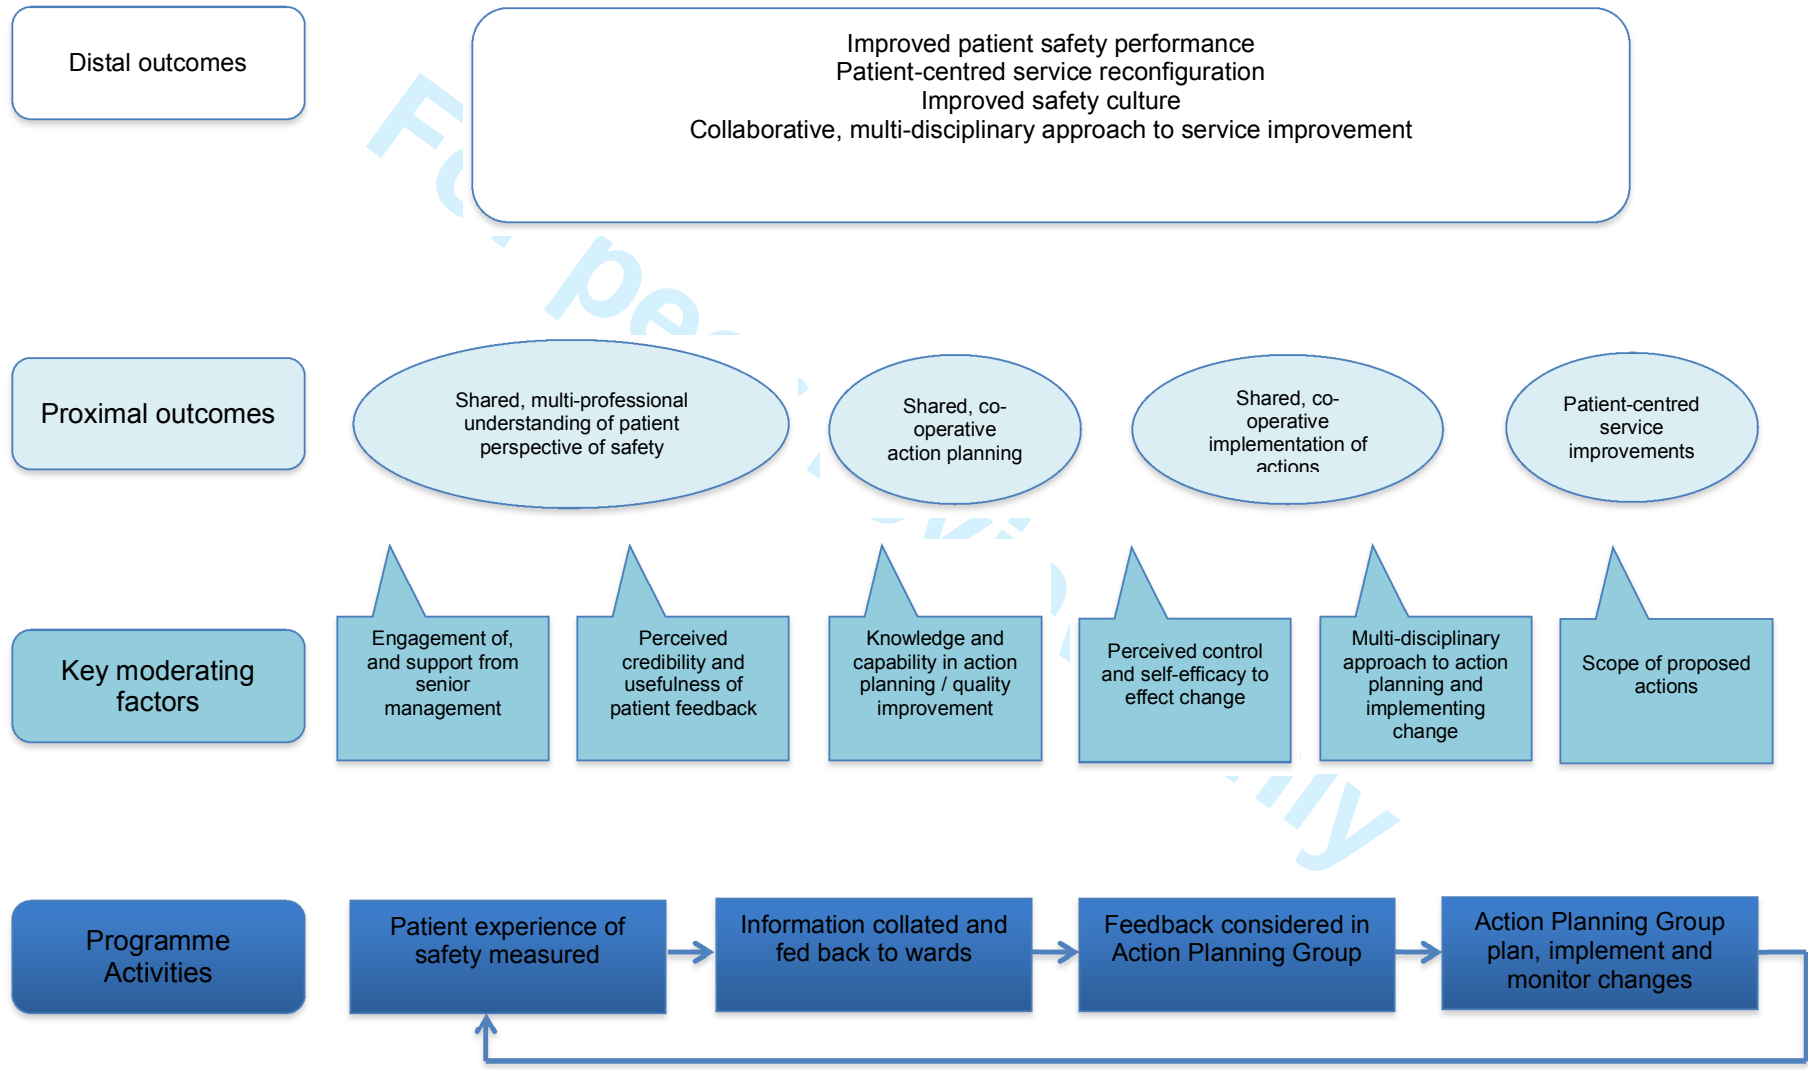

Figure 1|– Engagement typologies diagram

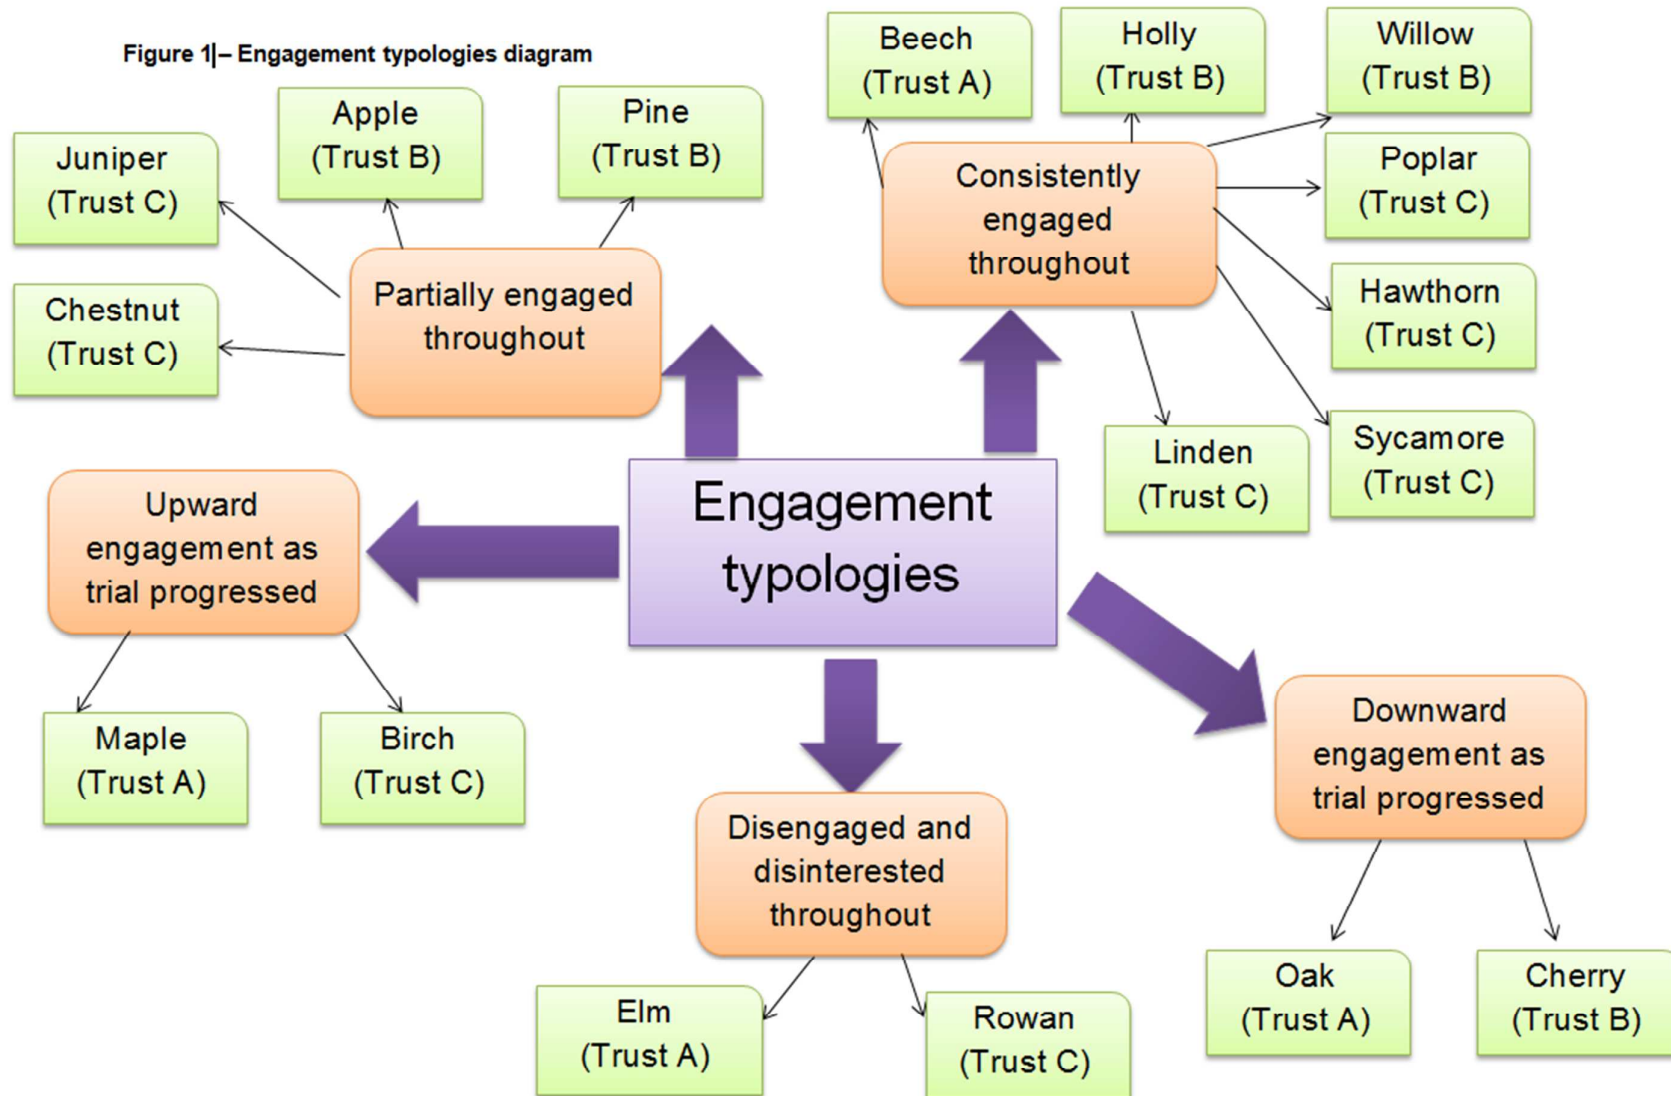

1  
2  
3  
4  
5  
6  
7  
8  
9  
10  
11  
12  
13  
14  
15  
16  
17  
18  
19  
20  
21  
22  
23  
24  
25  
26  
27  
28  
29  
30  
31  
32  
33  
34  
35  
36  
37  
38  
39  
40  
41  
42  
43  
44  
45  
46  
47  
48  
49

1  
2  
3  
4  
5  
6  
7  
8  
9  
10  
11  
12  
13  
14  
15  
16  
17  
18  
19  
20  
21  
22  
23  
24  
25  
26  
27  
28  
29  
30  
31  
32  
33  
34  
35  
36  
37  
38  
39  
40  
41  
42  
43  
44  
45  
46  
47  
48  
49

For peer review only

# BMJ Open

## Exploring how ward staff engage with the implementation of a patient safety intervention: A qualitative process evaluation

|                                 |                                                                                                                                                                                                                                                                                                                                                                                                                                                                                             |
|---------------------------------|---------------------------------------------------------------------------------------------------------------------------------------------------------------------------------------------------------------------------------------------------------------------------------------------------------------------------------------------------------------------------------------------------------------------------------------------------------------------------------------------|
| Journal:                        | <i>BMJ Open</i>                                                                                                                                                                                                                                                                                                                                                                                                                                                                             |
| Manuscript ID                   | bmjopen-2016-014558.R1                                                                                                                                                                                                                                                                                                                                                                                                                                                                      |
| Article Type:                   | Research                                                                                                                                                                                                                                                                                                                                                                                                                                                                                    |
| Date Submitted by the Author:   | 24-Feb-2017                                                                                                                                                                                                                                                                                                                                                                                                                                                                                 |
| Complete List of Authors:       | Sheard, Laura; Bradford Institute for Health Research, Marsh, Claire; Bradford Institute for Health Research<br>O'Hara, Jane; Bradford Institute for Health Research; University of Leeds, Medical Education<br>Armitage, Gerry; University of Bradford Faculty of Health Studies<br>Wright, John; Bradford Institute for Health Research<br>Lawton, Rebecca; University of Leeds, Institute of Psychological Sciences; Bradford Institute for Health Research, Quality and Safety Research |
| <b>Primary Subject Heading</b>: | Health services research                                                                                                                                                                                                                                                                                                                                                                                                                                                                    |
| Secondary Subject Heading:      | Qualitative research                                                                                                                                                                                                                                                                                                                                                                                                                                                                        |
| Keywords:                       | Organisation of health services < HEALTH SERVICES ADMINISTRATION & MANAGEMENT, Quality in health care < HEALTH SERVICES ADMINISTRATION & MANAGEMENT, QUALITATIVE RESEARCH                                                                                                                                                                                                                                                                                                                   |
|                                 |                                                                                                                                                                                                                                                                                                                                                                                                                                                                                             |

SCHOLARONE™  
Manuscripts

only

1  
2  
3 Exploring how ward staff engage with the implementation of a patient  
4 safety intervention: A qualitative process evaluation  
5  
6

7 Laura Sheard  
8 laura.sheard@bthft.nhs.uk  
9 Bradford Institute for Health Research, United Kingdom  
10

11 Claire Marsh  
12 claire.marsh@bthft.nhs.uk  
13 Bradford Institute for Health Research, United Kingdom  
14

15 Jane O'Hara  
16 jane.o'hara@bthft.nhs.uk  
17 Bradford Institute for Health Research & University of Leeds, United Kingdom  
18

19 Gerry Armitage  
20 g.r.armitage@brad.ac.uk  
21 University of Bradford, United Kingdom  
22

23 John Wright  
24 john.wright@bthft.nhs.uk  
25 Bradford Institute for Health Research, United Kingdom  
26

27 Rebecca Lawton  
28 r.j.lawton@leeds.ac.uk  
29 Bradford Institute for Health Research & University of Leeds, United Kingdom  
30

31 Corresponding author:  
32 Laura Sheard  
33 Bradford Institute for Health Research  
34 Bradford Teaching Hospitals  
35 Bradford Royal Infirmary  
36 Duckworth Lane  
37 Bradford  
38 BD9 6RJ  
39 United Kingdom  
40  
41  
42  
43  
44  
45  
46  
47  
48  
49  
50  
51  
52  
53  
54  
55  
56  
57  
58  
59  
60



**ABSTRACT**

*Objectives* – A patient safety intervention was tested in a 33 ward randomised controlled trial. No statistically significant difference between intervention and control wards was found. We conducted a process evaluation of the trial and our aim in this paper is to understand staff engagement across the 17 intervention wards.

*Design* – Large qualitative process evaluation of the implementation of a patient safety intervention.

*Setting and participants* – NHS staff based on 17 acute hospital wards located at five hospital sites in the North of England.

*Data* – We concentrate on three sources here: i) analysis of taped discussion between ward staff during action planning meetings ii) facilitators' field notes iii) follow up telephone interviews with staff focussing on whether action plans had been achieved. The analysis involved the use of pen portraits and adaptive theory.

*Findings* – First, there were palpable differences in the ways that the 17 ward teams engaged with the key components of the intervention. Five main engagement typologies were evident across the life course of the study: consistent, partial, increasing, decreasing and disinterested. Second, the intensity of support for the intervention at the level of the organisation does not predict the strength of engagement at the level of the individual ward team. Third, the standardisation of facilitative processes provided by the research team does not ensure that implementation standardisation of the intervention occurs by ward staff.

*Conclusions* - A dilution of the intervention occurred during the trial because wards engaged with PRASE in divergent ways, despite the standardisation of key components. Facilitative processes were not sufficiently adequate to enable intervention wards to successfully engage with PRASE components.

**STRENGTHS AND LIMITATIONS OF THIS STUDY**

- We devised a process evaluation that had several robust qualitative data collection methods which complemented each other, in order to build a comprehensive and holistic picture of how ward staff implemented the intervention
- Our approach allowed us to reveal how the differing ways in which staff teams engage with the intervention may impact on patient safety changes at a ward level
- Our novel analytic approach utilised pen portrait methodology in a differing way to how it has previously been used in health services research, in order to document the journey of 17 wards interacting with an intervention over an 18 month period
- We have little understanding of whether the implementation of PRASE may have gained traction and fuelled subsequent ward based change once the research team left the field
- The qualitative methods we chose were designed to capture a broad understanding of the contexts in which the intervention was implemented but had we known a priori that engagement was such a significant factor, we may have designed the process evaluation to specifically explore its influence.

## BACKGROUND

Measurement of patient safety has traditionally relied on information from staff such as incident reports or recording information about harms such as falls or pressure sores. Recently, patients have been emphasised as being an important detector for patient safety and likened to the 'smoke detectors' of safety [1]. There is an increasing recognition that hospitals need to find better ways to capture and respond to the concerns of patients regarding the quality and safety of their care [2-4]. However, patients are rarely asked about structural or procedural aspects of care which may contribute towards failures in patient safety. The Yorkshire Quality and Safety group have developed a patient safety intervention called Patient Reporting and Action for a Safe Environment (PRASE). This intervention firstly elicits patient perceptions on how a ward is performing on a series of issues which are known to contribute towards patient safety incidents and secondly assists staff to interpret patient feedback to aid service improvements. This paper provides an account of a qualitative process evaluation of a randomised controlled trial (RCT) where PRASE was tested. PRASE was designed [5, 6], tested for feasibility [7] and trialled [8, 9] between 2010 and 2015. This period has been charted as an era of paradigm shift for patient safety research when the dominant 'measure and manage' orthodoxy has been enriched by approaches sensitive to setting and socio-cultural/ political influences [10]. It became essential for a process evaluation to capture the nuances involved in the PRASE implementation.

Process evaluations have been used to explain sub-optimum outcome effects, specifically whether there was a 'fault' with the intervention itself, its key components or with delivery [11]. Latterly, they are often not only concerned with adherence to original plans, but also with broader issues such as unintended consequences or the strengths and weaknesses of the intervention itself [12]. Some process evaluations have been able to identify a precise 'pinch point' or problem with an essential component of the intervention that caused it to fail. In a UK trial of peer led HIV prevention for gay men in London, no effect was shown. A qualitative process evaluation [13] revealed that the essential component of 'peer educator' had not played out as intended during the course of the trial due to recruitment problems and the inability of peer educators to confidently communicate harm reduction messages to intended targets. Other process evaluations have been able to point to more general cultural or structural reasons why an intervention may not have succeeded. Dixon-Woods et al [14] evaluated why a U.S. developed patient safety intervention - regarding decreasing central line infections in intensive care units - struggled with implementation after the intervention was transferred to a U.K. setting. A post-hoc qualitative evaluation revealed multiple reasons why, largely the result of cultural differences between the U.S and U.K. settings. It is clear from these examples that process evaluations can support the largely 'experimental' aim of RCTs by identifying specific 'pinch points' within an intervention itself or within the context that will help to explain success or failure.

The components of the intervention have been reported in detail elsewhere [8], and the results of the randomised controlled trial which demonstrated no statistically significant effect between the intervention and control wards [9]. A feasibility study was undertaken prior to commencement of the full RCT and details of our logic model and moderating factors are reported in the feasibility write up [7]. Here, we provide a synopsis of the intervention and results of the trial for the reader to be able to view our process evaluation in context. Appendix 1 provides a detailed summary of the cyclical activities and facilitative processes of the intervention that were trialled, alongside anticipated outcomes. Appendix 2 describes the trial design and results. Briefly, this was a cyclical study with two phases of: i) collecting patient feedback about safety from patients at the bedside ii) collation of this data and ward staff interpreting it iii) ward staff action planning to improve patient safety iv) plans then being implemented and monitored.

## METHODS

We conducted a robust process evaluation involving differing qualitative and quantitative methods [8] which gathered comprehensive data about all 17 intervention wards. We drew upon a published framework [12] for designing process evaluations of cluster randomised controlled trials. The main a priori research question was: 'where does the intervention work, how and why?' [8]. In this paper, we have chosen to focus on the 'how?' and 'why?' and present a detailed picture of how staff engaged with the intervention. We now apply our original research question to understand how and why the intervention did *not* work, given the intervention did not have a significant effect on outcomes. Six mixed methods were used in the wider process evaluation but due to the extent and depth of the data collected, we focused intensively on three qualitative methods for the purpose of this paper. The methods described below are those most pertinent to exploring how staff engaged with the intervention in the ways they did, and why. Data was collected between August 2013 to November 2014. NHS ethical approval was granted in March 2013.

### *1. In depth analysis of taped discussion between ward staff*

Action planning meetings (APMs) were digitally recorded for all 17 wards at both phases. At phase two, one ward did not meet so we considered the recordings of 33 APMs. These ranged in length from 27 to 80 minutes (average 43 minutes). Our examination focused on which areas of patient feedback staff chose to make action plans on and which areas they chose not to. We wrote detailed notes whilst listening to the voice file. We structured our notes under the headings: i) Issues seen as important where actions were made (and why) ii) Issues seen as important where no actions were made (and why not) iii) Issues dismissed and reasons for this iv) Comments made by staff about PRASE process/ study/ team v) Comments made by staff about the ward or hospital context.

### *2. Facilitator's field notes*

These notes were written shortly after the APM had finished and captured: i) implicit dynamics between staff, such as body language, tone of voice and other non-verbal cues ii) environmental factors, such as descriptions of the physical space where the meeting was held iii) facilitator's overall impressions. Field notes were brief and gave a 'snapshot' of the meeting. There were three facilitators across the 17 intervention wards and each facilitator worked with the same wards across both phases of the study, to ensure continuity.

### *3. Follow-up telephone interviews conducted with the APM lead*

The purpose of these short, structured phone interviews was to ascertain whether action plans had been successfully implemented or not and why. They were conducted around six months after the APM, with the 'PRASE lead' for each ward. Each ward was responsible for nominating a named member of ward staff - who was part of the action planning meeting - to be the PRASE lead. This could be any member of the team but was more often than not the person who volunteered for the role was a senior nurse. A structured interview guide was used. Researchers had a proforma in front of them which contained details about each action plan per ward and they asked the PRASE lead whether each action plan had been implemented – yes, no or partially. Open questioning then continued to understand the factors surrounding this. Five additional questions were asked which focussed on the PRASE lead's opinion of the facilitative processes embedded in the study.

For the purpose of this paper, we wanted to understand **qualitatively** how wards had engaged (or not) with the PRASE intervention. Implementation fidelity (which captures adherence to specific intervention components) is reported quantitatively elsewhere [9]. Engagement of staff with an intervention can be considered as closely aligned but different from this, referring more to the differing approaches and attitudes that staff take to the task in hand (implementation of different components of the intervention). This is different to whether they have simply delivered the task or not. We decided not to adhere to a numerical/scale definition of 'engagement' whereby differing wards attained a binary

1  
2  
3 definition of either 'engaged' or 'disengaged' with the intervention. Instead, we undertook a  
4 nuanced analysis of staff approaches and attitudes to: conducting an action planning  
5 meeting, creating quality action plans and implementation of these action plans. We  
6 explored 'engagement' as a concept that we define as the 'depth' and 'nature' of ward teams'  
7 approaches and attitudes to the intervention.  
8

9 Informed by this understanding of engagement, a synthesis of the above data sources has  
10 provided us with a rich account of the '**engagement trajectory**' of each ward and this was  
11 realised by creating a pen portrait of engagement. Pen portraits have been used previously  
12 in applied health research in fields as diverse as: end of life care [15], vulnerable old people  
13 being enabled to keep warm in their homes [16] and sleeping practices amongst homeless  
14 drug users [17]. Previously, they have provided a narrative account of a 'typical' participant in  
15 qualitative studies or as an analytic aide memoir. We used them in a slightly different manner  
16 to document the 'journey' of the wards throughout the trial from the perspective of the  
17 researcher who had worked closely with these wards for over 18 months. There is a lack of  
18 methodological literature pertaining to the construction of a pen portrait and this has been  
19 left to the discretion of individual research teams. We created a basic structure for the pen  
20 portraits which centred on the writing of a linear, longitudinal account of how each ward had  
21 engaged with relevant key components of the intervention and the contextual factors which  
22 influenced this, ensuring that all three data sources were drawn upon. We did not use an  
23 existing theory or framework on which to extract the data for the pen portraits as we wanted  
24 the emergent findings to arise inductively from the data set. As staff engagement was our  
25 focus, we included as much material on this as possible (along with explanatory factors and  
26 necessary description). We excluded minutiae which did not add to the 'big picture' of the  
27 ward team's engagement to maintain a focussed pen portrait. The pen portrait for Holly ward  
28 is shown in Appendix 3 with the prose annotated as an illustration of how portraits were  
29 constructed from the three data sources outlined above.  
30

31 Researchers took into account all the information contained within the pen portrait and  
32 attributed an overall 'engagement trajectory' label to each ward. Author A wrote all pen  
33 portraits for Trusts A and B and Author B for Trust C. We categorised the 17 different ward  
34 engagement trajectories into five main 'engagement typologies', which emerged from an  
35 analytical session centring mainly on consensus discussion between Author A and Author B.  
36 We report three overarching themes in this paper, which are described in detail in the  
37 Findings section which follows. The above categorisation of engagement typologies led to  
38 the content of the first theme. After we were confident of the findings of this first theme, we  
39 then used the differences in engagement detailed in this theme to progress to themes two  
40 and three. To achieve this, we looked between and across the engagement trajectories of all  
41 17 wards in order to understand how engagement with the intervention related to  
42 components of local implementation. We returned to the detail of the pen portraits to  
43 understand commonality and difference and from this we developed the coding framework  
44 for themes two and three. We then checked our assumptions by testing the data in the pen  
45 portraits against our initial coding framework. After minor adaptations, we then coded the data  
46 in all 17 pen portraits. Overall, we used techniques derived from 'adaptive theory' [18] which  
47 allows for high level frameworks and conceptualisations to emerge from data rather than  
48 descriptive themes. Adaptive theory proposes a continual engagement between the arising  
49 empirical data and arising theoretical interpretations of the research, working in a continuous  
50 cycle with each cycle generating new explorations.  
51  
52  
53  
54  
55  
56  
57  
58  
59  
60

## FINDINGS

We now set out to understand the ways in which the 17 intervention wards engaged with the intervention. We are interested in how a multiplicity of engagement styles could have made an already complex intervention become hyper complicated in its implementation phase. This 'hyper complexity' may have served to dilute key elements of the intervention. By 'dilution' we mean 'non-standardisation' of the intervention group, thereby reducing the potential for this to be meaningfully compared with a control group. We explore three high level themes, which emerged from the data. Firstly, we will describe how there were palpable differences in the ways that ward teams engaged with the intervention. Next, we will look at how support for the intervention at the level of the Trust does not indicate ward level support. Lastly, we will demonstrate that standardisation of facilitative processes by the research team does not ensure this filters down to implementation standardisation by ward staff. All quotation extracts are taken from pen portrait notes and all ward names have been ascribed a pseudonym.

### *1. The same intervention can be interacted with in highly divergent ways*

We were able to distinguish the intervention wards into five main 'engagement typologies' (Appendix 4). They are:

- Consistently engaged throughout (7 wards)
- Partially engaged throughout (4 wards)
- Increasing engagement as trial progressed (2 wards)
- Decreasing engagement as trial progressed (2 wards)
- Disengaged and disinterested throughout (2 wards)

Consistently engaged – This represents the largest category of how wards chose to participate in the trial with 7 out of the 17 residing here. These wards were fully signed up to the ethos of listening to and acting on patient feedback. They took part in a high proportion of the key components of the cyclical activities and made quality action plans which were largely implemented in both phases. A quality action plan can be defined as one which seeks to address issues identified in the patient data and was realistic, relatively timely and more than likely to be achieved. Motivation to take part in the research was high and improving patient safety was even higher.

Partially engaged – These four wards generally did everything asked of them by the research team and largely participated in intervention components but were sometimes lacklustre in their motivation towards improving patient safety. At times, it felt like action planning was just 'going through the motions'. The ability of staff to implement action plans was mixed although this was sometimes due to external factors rather than inertia on the part of the ward staff themselves.

Increasing engagement – These two wards began their involvement with the trial in an ambivalent and – in the case of Maple ward – even hostile manner. However, as the study progressed and the ward staff began to understand what the research team were trying to achieve, engagement with the study solidified. The similarity between these two wards (despite being at different Trusts) is that the turning point for their engagement was attendance at the peer centred Mid-Point Meeting. This is reflected in Maple ward's complete U-turn with implementation of quality action plans at phase two as compared with partial implementation of weak action plans at phase one.

Decreasing engagement – Conversely, another two wards engaged with the study relatively well at the beginning but, over time, slipped in their level of interest and involvement. Cherry ward is the only ward across all 17 who did not meet in an APM in phase two. The follow up telephone interview revealed that the ward manager for Cherry did not believe the study was a priority. Oak ward had ambitious plans for their phase one action planning but had become

1  
2  
3 dejected by the amount of time their plan was taking to come into effect. Subsequently, they  
4 declined to make an action plan in the phase two APM and appeared disinterested in the  
5 study.  
6

7 Disengaged and disinterested – Although these two wards met in APMs for both phases of  
8 the trial, they were not interested in using the PRASE data to improve patient safety and  
9 viewed the study as a burden. However, the reasons for this response differed. Rowan were  
10 a low performing ward whose ward manager preferred to concentrate on the other initiatives  
11 rather than our research study. Elm ward were outwardly hostile to the ethos of the study,  
12 critical of the comments their patients had made to researchers and defensive of staff  
13 members. Despite agreeing to hold an APM, they consistently refused to make action plans.  
14

15 Through an examination of these differing engagement trajectories, we can unpick where  
16 parts of the intervention may have led to divergent strategies for local implementation of the  
17 intervention on a ward-by-ward basis. These findings from 'on the ground' implementation by  
18 ward teams directly contradict some of the core assumptions held by the research team at  
19 the outset of intervention development - namely, that by providing facilitative processes,  
20 wards would be able to implement in a uniform manner. It is this aspect of a chasm between  
21 implementation expectations and reality which we now turn our attention to.  
22

## 23 *2. Trust-level support for an intervention does not predict the strength of ward-level* 24 *engagement*

25 A key assumption was that strong corporate, managerial-level support by the three  
26 participating Trusts would facilitate high-level engagement by wards. However an  
27 examination of the differing types of engagement trajectories, shown in Figure 1, throw doubt  
28 on this assumption and we can find little consistency in engagement style between the  
29 wards at the same Trust. For instance, Trust A is a small district general hospital in a semi-  
30 rural, affluent area. This Trust prides itself on being a forward thinking, cohesive workplace  
31 and senior management support for this intervention was exceptionally strong. However,  
32 when reduced down to the level of the ward, we can see that the four intervention wards at  
33 Trust A are represented across four distinct engagement trajectories (Consistent = Beech,  
34 Increasing = Maple, Decreasing = Oak, Disengaged = Elm). Engagement trajectories for  
35 each of the other two Trusts also differed considerably by ward. The implication here is that  
36 corporate culture - and receptivity to patient feedback at the level of the organisation - is not  
37 a simple predictor of engagement at ward level.  
38

39 Unpicking these differences further, we find that despite a uniform message about the  
40 importance of a multi-disciplinary approach to the study, wards seem to have interpreted this  
41 differently. Oak ward convened a strong first multi-disciplinary APG with representatives from  
42 nursing, allied health professionals and support staff. In contrast, on some wards PRASE  
43 remained led and implemented by just one or two nursing staff. For example, Maple's first  
44 APG consisted of just the ward manager and pen portrait notes illustrate why:  
45

46 *A very tense meeting held with just the ward manager who appeared overtly stressed*  
47 *and about to implode. It was clear at this first APM that the ward manager had not*  
48 *understood the purpose of the study and became upset by some of the negative*  
49 *comments which her patients had made in the report. It was a difficult APM to*  
50 *convene as the ward manager thought she had to solve everything by herself and*  
51 *this was partially reinforced by the fact that she had not invited any of her staff to the*  
52 *APM (Maple, Trust A)*  
53

54  
55 The research team never envisaged that the intervention would be taken on by just one or  
56 two members of ward staff and this was actively discouraged throughout but still persisted in  
57 five wards at phase one and six wards at phase two, across the 17 intervention wards. It is  
58 difficult to suggest a clear reason why this happened but it was often related to:  
59  
60

- Front line issues, such as no staff available to be released from direct patient care to attend APG
- A minority of ward managers viewing the study as yet another patient safety initiative that they just needed to 'get on with'
- A misunderstanding of the multi-disciplinary nature of the intervention.

Of most interest is the severe paucity of medical staff involved in the intervention with only four wards (all at Trust C) involving a medic. This was unforeseen at the outset and may have contributed to action plans that were narrower in scope than those generated by a strong MDT. Even those wards who managed to convene a strong multi-disciplinary APG in phase one were often not able to sustain this level of input going into phase two. Towards the end of the study, it was disappointing to see that PRASE had unwittingly become badged as a 'nursing initiative'. Medical and allied health professional input declined over time and the workload was disproportionately being shouldered by individual Ward Managers (managerial nurses) who were for the most part already overloaded in their daily clinical roles.

Furthermore, an assumption was that a tight, coherent and most importantly *consistent* group of staff would engage with the intervention throughout the 14 months of staff involvement. In reality, staff movement around the NHS estate was high. This led to difficulties regarding ownership of action planning with some staff reluctant to proceed with action plans devised by their predecessors and others not believing it was worth the effort to become involved in the study if they were moving on shortly. A few ward teams changed their personnel completely between phase one and two of the study due to managerial reorganisation:

*A massive change in staffing took place around the latter part of Phase one with a new Ward Manager and 80-85% change in ward staff. The second phone interview revealed that other ward initiatives were taking place...the whole PRASE process was never wholly embraced because of intense ward improvement work, and staff flux, taking place at the same time (Chestnut ward, Trust C)*

It was never anticipated that such wholesale change would take place at the level of the individual ward teams within the lifetime of the trial and the intervention was unprepared for this. There was little formal capacity to continually re-introduce PRASE to new ward staff, despite researchers having to perform this ad hoc and unexpected role. Critically, it points to ownership of the intervention on the ground as a key factor in success. The engagement with the intervention becomes weak if it is passed around large numbers of different staff or if staff groups change on a dramatic scale.

### *3. Standardisation of facilitative processes by the research team does not necessarily ensure implementation standardisation by ward staff*

A key intention of the facilitative processes was to ensure standardisation of implementation by ward staff. The process evaluation found that, in reality, these uniform training and facilitative processes resulted in little standardisation of approach to action planning regarding a) the issues which staff chose to focus on or b) whether the action plans were successfully implemented (or not). Our pen portraits point to three main issues that appear to underpin why:

- Implementation of action plans were often related to buy in and collegiate working with other departments, some of whom were not willing to spend time, resource and effort on an issue which was not their own
- Existing pan-Trust safety and quality campaigns were prioritised over and above PRASE, to differing degrees which variably helped or hindered PRASE intentions
- Success was often the result of a complex interplay between the personal will of the staff involved in the APG and whether the study fitted into current ward priorities



1  
2  
3  
4 The following pen portrait excerpt from Apple ward exemplifies the first identified issue  
5 regarding buy in from other departments. This ward had several negative comments from  
6 patients that pain relief was not being given in a timely manner. To address this, the APG  
7 decided they needed assistance from pharmacy but this was not forthcoming and APG  
8 members were disappointed. This led to the contradictory position in phase two of  
9 engagement still being very present but the act of action planning itself becoming tokenistic:  
10

11 *This ward stayed engaged with the project the entire way through despite setbacks with*  
12 *their earliest action plan. The ward manager in particular clearly understood the purpose*  
13 *of the study and was sympathetic to receiving patient feedback. However, inertia may*  
14 *have crept in as their 'outside the box' thinking in phase one did not get any buy in from*  
15 *the pharmacy department. Action planning in phase two then became perfunctory even*  
16 *though engagement was still high (Apple, Trust B)*  
17

18 The second issue of other safety campaigns being prioritised above this study relates to the  
19 capacity with which ward staff have within their normal clinical roles to be able to undertake  
20 improvement work. In several of the pen portraits, PRASE was described as “just one of  
21 many improvement initiatives which this ward are involved in”. Wards were under pressure  
22 to take part in hospital wide initiatives that executive teams had deemed to be of most  
23 importance. Whilst there was senior support for PRASE, it was not always significant in  
24 comparison to other initiatives. In some cases, the existence of other high profile campaigns  
25 supported staff in achieving their PRASE action plans. Trust C launched a well-received  
26 “Hello my name is...” patient experience campaign tying into national acknowledgement of  
27 the need for staff to introduce themselves and communicate better with patients at the  
28 bedside. On the wards where PRASE feedback had also drawn attention to this need, staff  
29 were supported to respond (through badges, awareness training and senior-support) to do  
30 so.  
31

32 However, the flip-side of attention on more high-profile campaigns meant that – for some  
33 wards – PRASE became sidelined. Associated with this was a feeling of patient safety and  
34 quality ‘fatigue’ with the amount of initiatives in this area felt too numerous and therefore  
35 burdensome on staff time:  
36

37 *I got the sense that the ward manager saw PRASE as just another audit which she*  
38 *needed to go through the motions of...At one point during phase two, she admitted*  
39 *that in phase one she did not see the value in the study as she thought it just*  
40 *replicated other patient experience measures her ward is involved in. However, now*  
41 *she appreciates how it is different from the other measures...Working out where*  
42 *PRASE fitted in with other initiatives seemed to be a big issue for this ward manager*  
43 *(Pine Ward, Trust B)*  
44

45 One strong finding to emerge was the use of PRASE data to reinforce safety or quality  
46 issues which the ward staff knew about tacitly but did not have robust data about in order to  
47 report to senior management. This finding emerged as a divisive issue. Some wards were  
48 pleased that the PRASE study reinforced staff opinion about the ward or validated on a  
49 larger scale the results of local audits. However, a minority of staff became irritated and  
50 instead viewed it as duplication.  
51  
52  
53  
54  
55  
56  
57  
58  
59  
60

## DISCUSSION

As introduced at the outset, some process evaluations are able to reveal specific 'pinch points' within the intervention itself [13], or within the overall setting in which it was applied [14], which help to explain why no effect was seen. The Consolidated Framework for Advancing Implementation Research advocates the 'inner setting' of an organisation as being influential in whether or not implementation can be achieved, where attention must be paid to the domains of: structural characteristics, networks and communications, culture, implementation climate [19]. Our process evaluation found that this inner setting was so varied between wards within the intervention group that this led to a general 'dilution' of intervention implementation. We found striking differences between wards across all the above domains of 'inner setting' – stability of ward teams, quality of relationships between different wards, basic assumptions towards receiving patient feedback and a learning climate (or lack of one). Significantly, we saw changes to the 'inner setting' constructs over time. The in-depth analysis of what happened within the intervention group generates useful insights for implementation of, and staff engagement with, patient safety initiatives to which we will now turn our attention.

The improvement of patient safety is already acknowledged as a cultural issue and the importance of factors such as teamwork, leadership and organisational processes operating at and between multiple levels [20]. Navigating this territory - particularly the link between 'sharp end' ward safety initiatives and 'blunt end' corporate planning - has been documented as a necessary challenge. Initiatives which do not pay adequate attention in this regard are at best destined to fail, and at worst may over-burden already de-motivated staff [21]. The facilitative processes incorporated into PRASE were designed to help address this challenge. These processes arose from the findings of feasibility testing of the intervention [7] where our research team found that, for example, access to senior management at regular intervals and assistance in interpreting patient feedback were important factors which may support action planning. The assumption was that by providing these processes, staff would be better placed to successfully navigate complex organisational territory. It was anticipated this would allow some uniformity amongst the intervention group. In actuality, the facilitative processes were not adequate to ensure any such uniformity.

Dixon-Woods et al (2011) [22] developed a post theorisation of why impressive results were seen in the original Michigan intervention - to decrease central line infections - in the U.S. Six reasons are proposed as to why the program worked. Of particular applicability is the 'creation of a networked community' where ward teams came together to build rapport and support for each other whilst identifying and resolving common barriers. Although part of the facilitative processes within the PRASE intervention aimed to attend to this need, it is likely that the community of wards involved in the study never reached a critical threshold in becoming an organic community who regularly reached out to each other. Further, specific leaders were targeted in the Michigan programme including hospital executives and clinical team leaders. This involvement of leaders at differing levels of the organisation is theorised as being integral to the success of the programme. Conversely, we found that involving senior management and matrons prior to the start of the study and then throughout its entirety had minimal effect on strengthening engagement with the intervention on the ground by frontline ward staff. Questions regarding the ability of senior management to support consistency of intervention adoption throughout an organisation, and the processes required to enable this further, were raised by our study and certainly warrant further exploration.

In this study, the relationships between different parts and levels of the organisation from senior management to ward teams to individuals were vital in achieving success. When these levels align well, as they appeared to do in one Trust - with respect to a culture shift around introducing and communicating to patients via an external patient experience campaign - it appears that much can be achieved. When they do not – e.g. Apple ward who did not get buy in from the pharmacy department - staff at the ward level can become

1  
2  
3 frustrated and demotivated. We therefore question the capacity of an externally designed  
4 intervention, even one with significant resources and facilitative processes, to provide the  
5 mechanisms to be continually adaptive to the organisational alignment between the sharp  
6 and blunt end at differing institutions. The challenges revealed here are about deeper  
7 organisational culture, systems and processes that need longer-term development.  
8  
9

10 Our findings support the growing understanding that emphasis in patient safety research  
11 must continue to shift from the measure and manage orthodoxy of data collection to  
12 interpretation and process [10]. In this research, the collection of patient feedback was the  
13 least problematic element. The complexity of what staff are being asked to do in  
14 interventions like PRASE (navigating multi-layered organisational systems to implement  
15 improvements) requires much more consideration. In the broader but related policy area of  
16 patient experience, the overt emphasis and huge resource allocated to collecting patient  
17 experience data has not been matched by efforts to utilise and evaluate the impact of  
18 feedback on service improvement [23]. There is increasing recognition that using data  
19 sources to change practice demands creativity and skills from staff; hence the tendency to  
20 present staff with data and expect change to happen as a result [24]. Our intervention  
21 considered these issues a priori and hence facilitative processes were built into the trial yet  
22 they were not sufficiently robust enough to ensure a standardised implementation across  
23 intervention wards.  
24

25 One interpretation of PRASE could be that it 'failed' due to showing no effect between the  
26 intervention and control wards. We believe this a simplistic view which does not take into  
27 account the wealth of positive benefits which patients and staff gained. Firstly, it showed that  
28 patients are able to give feedback about the safety and quality of care and that they want to  
29 do this en masse (our consent rate was 85% of those patients approached by researchers  
30 and the number of patients recruited to the study was 2400 across five different hospital  
31 sites). Secondly, the process evaluation showed that most staff *do* believe the patient voice  
32 is important and there is an imperative to listen to, and act on, this voice. Thirdly, despite  
33 local struggles, most staff do want to action plan to improve their patients' care. The majority  
34 of the wards were receptive to receiving patient feedback – it is when they tried to move  
35 improvement work forward that problems arose [25]. An additional gain which some staff  
36 identified was the ability of the patient feedback to allow staff to understand not only the  
37 patient perspective but also their priorities and to visualise the ward environment and  
38 systems 'through the eyes of the patient'.  
39

#### 40 *Limitations*

41 We cannot know whether positive attitudes towards patient involvement in patient safety  
42 have continued on the intervention wards after the trial was completed. Improvements that  
43 staff were working towards may have gained impetus since the research team left. Equally,  
44 involvement in the trial may have kick-started ideas which, although did not come to fruition  
45 within its life span, may now be fuelling ward level action. Conversely, staff may have felt  
46 disempowered to enact improvement to the ward environment if their PRASE action plans  
47 had floundered. We have no format for measuring this 'after effect' – either positive or  
48 negative – and little scope for knowing at what time point the evidence of a more long lasting  
49 effect may be captured.  
50

51  
52 Our pen portrait methodology is a culmination of all sources of qualitative data collected and  
53 has its inherent weaknesses. This methodology is still in its relative infancy in relation to the  
54 way in which we have utilised it here. We were careful to draw equally on all sources of data  
55 in order to build a comprehensive narrative of the engagement trajectory of each ward.  
56 However, a differing analysis paying attention to fewer sources or an unequal weighing of  
57 sources may have pulled the narrative account in a slightly different direction. Further, it was  
58 difficult to categorise some wards firmly into their allocated engagement typology and  
59  
60

1  
2  
3 arguably some could fit into several. Finally, process evaluation methods were developed a  
4 priori to the start of the trial so the design was very open. We devised a loose structure to  
5 capture qualitative intelligence on key trial processes. If prior knowledge existed that  
6 diversity of engagement within the intervention wards was to be so significant, it may have  
7 been possible to target a particular process evaluation framework for analysing outcomes in  
8 relation to this diversity, such as the 'diffusion of innovation model' [26]. It is a possibility that  
9 utilisation of differing methods may have provided other answers as to where different  
10 elements of the intervention worked, for whom and why.

## 11 12 **CONCLUSION**

13 Whereas previous process evaluations point towards specific pinch points or broader cultural  
14 issues to understand why an intervention showed no effect, this study points to an overall  
15 'dilution effect' of the intervention. This was largely due to wards engaging with the  
16 intervention in highly divergent manners despite the standardisation of key components by  
17 the research team. The facilitative processes were inadequate to ensure full engagement  
18 across all wards in the study. A disconnect existed between senior management support for  
19 the study and how ward staff on the ground engaged with it more locally. The above findings  
20 assist in explaining why the trial saw no effect between intervention and control wards.

## 21 22 23 **DECLARATIONS**

### 24 25 *Funding*

26 This study was funded by the National Institute for Health Research under its Programme  
27 Grants for Applied Research scheme ('Improving patient safety through the involvement of  
28 patients', RP-PG-0108-10049). The views expressed are those of the authors and not  
29 necessarily those of the NHS, the NIHR or the Department of Health

### 30 31 *Competing interests*

32 The authors declare they have no competing interests

### 33 34 *Authors' contributions*

35 RL, GA and JW are grant holders of the programme grant. LS devised the methodology of  
36 the process evaluation and wrote the qualitative protocol, with assistance from CM. LS, CM  
37 and JOH all collected data. LS and CM analysed and interpreted all data, with intellectual  
38 input from GA. LS and CM co-wrote the first draft of the paper. All authors edited the first  
39 draft of the paper. All authors read and approved the final manuscript.

### 40 41 *Ethics approval and consent to participate*

42 The study was approved by South Yorkshire NHS Research Ethics Committee on 15<sup>th</sup> March  
43 2013 (Ref: 13/YH/0077). All participants gave informed consent to take part in this study.

### 44 45 *Acknowledgements*

46 Thanks for Gemma Louch, Jane Heyhoe and Yvonne Birks for research assistance in  
47 conducting some of the telephone interviews

## 48 49 **FIGURE HEADINGS**

50 Appendix 1 – Key intervention components and anticipated outcomes

51 Appendix 2 – Trial design and results

52 Appendix 3 – Holly ward pen portrait

53 Appendix 4 – diagram of engagement typologies

**REFERENCES**

1. Bacon N. A smoke-alarm for patient safety and healthcare quality. Neil Bacon Blog2010 [Web Log]. Retrieved June 2015. <http://neilbacon.wordpress.com/2010/12/13/a-smoke-alarm-for-patient-safety-and-healthcare-quality/>
2. Francis R: Report of the Mid Staffordshire NHS Foundation Trust Public Inquiry. London: The Stationery Office; 2013.
3. Berwick D: Improving the safety of patients in England. London: Department of Health; 2013.
4. Keogh B: Review into the quality of care and treatment provided by 14 hospital trusts in England: overview report. London: Department of Health; 2013.
5. Giles S, Lawton R, Din I, McEachan R: Developing a patient measure of safety (PMOS). *BMJ Quality & Safety* 2013, 22:554-562.
6. McEachan R, Lawton R, O'Hara J, et al: Developing a reliable and valid patient measure of safety in hospitals (PMOS): a validation study. *BMJ Quality & Safety* 2014, 23:565-573.
7. O'Hara J, Lawton R, Armitage G, et al. The Patient Reporting and Action for a Safe Environment (PRASE) Intervention: A feasibility study. *BMC Health Services Research*, 2016, 16:676
8. Sheard L, O'Hara J, Armitage G, et al. Evaluating the PRASE patient safety intervention-a multi-centre, cluster trial with a qualitative process evaluation: study protocol for a randomised controlled trial. *Trials*, 2014, 15: 420.
9. Lawton et al. Can patient involvement improve patient safety? A cluster randomized control trial of the Patient Reporting and Action for a Safe Environment (PRASE) Intervention. *BMJ Quality & Safety*, 2017, doi: 1136/bmjqs-2016-005570
10. Lamont T & Warring J. Safety lessons: shifting paradigms and new directions for patient safety research *Journal of Health Services Research and Policy* 2015, 20 (15) 1-8
11. Oakley A, Strange V, Bonell C et al: Process evaluation in randomised controlled trials of complex interventions. *BMJ* 2006, 332:413-416.
12. Grant A, Treweek S, Dreischulte T et al. Process evaluations for cluster randomised trials of complex interventions: a proposed framework for design and reporting. *Trials*, 2013, 14:15
13. Elford J, Sherr L, Bolding G et al. Peer led HIV prevention among gay men in London: process evaluation *AIDS care* 2002, 14 (3) 351-360
14. Dixon-Woods M, Myles L, Tarrant C, Bion J. Explaining Matching Michigan: an ethnographic study of a patient safety program *Implementation Science* 2013, 8:70
15. Pleschberger S, Seymour J, Payne S, et al. Interviews with end of life care for older people: reflections on six European studies *Qualitative Health Research* 2011, 21 (11) 1588-1600

- 1  
2  
3 16. Tod A, Lusambili A, Homer C et al. Understanding the factors influencing vulnerable older  
4 people keeping warm and well in winter: a qualitative study using social marketing  
5 techniques. *BMJ Open* 2012  
6
- 7 17. Nettleton S, Neale J, Stevenson C. Sleeping at the margins: a qualitative study of  
8 homeless drug users who stay in emergency hostels and shelters. *Critical Public Health*  
9 2012, 22 (3) 319-328  
10
- 11 18. Layder D: *Sociological Practice: Linking Theory and Research*. London: Sage; 1998.  
12
- 13 19. Damschroder L, Aron D, Keith R et al. Fostering implementation of health services  
14 research findings into practice: a consolidated framework for advancing implementation  
15 science *Implementation Science*, 2009, 4:50  
16
- 17 20. Taylor S, Dy S, Foy R et al. What context features might be important determinants of  
18 effectiveness of patient safety practice interventions? *BMJ Quality & Safety*, 2011, 20: 611-  
19 617  
20
- 21 21. Dixon-Woods M, Baker R, Charles K, et al. Culture and behaviour in the English National  
22 Health Service: an overview of lessons from a large multi method study. *BMJ Quality &*  
23 *Safety* 2014, 23, 106-115  
24
- 25 22. Dixon-Woods M, Bosk C, Aveling E et al. Explaining Michigan: Developing an ex post  
26 theory of a quality improvement program. *Milbank Quarterly*, 2011, 89 (2) 167-205  
27
- 28 23. Coutler, A. et al. (2014). Collecting data on patient experience is not enough: they must  
29 be used to improve care. *BMJ*, doi: <http://dx.doi.org/10.1136/bmj.g2225/>  
30
- 31 24. Gkeredakis, E. et al. Mind the Gap: understanding utilisation of evidence and policy in  
32 health care management practice. *Journal of Health Organization and Management*, 2011,  
33 25(3), pp. 298-314.  
34
- 35 25. Sheard L, Marsh C, O'Hara J t al. The Patient Feedback Response Framework –  
36 Understanding why UK hospital staff find it difficult to make improvements based on patient  
37 feedback: A qualitative study. *Social Science & Medicine*, 2017, 178, 19-27  
38
- 39 26. McMullen H, Griffiths C, Leber W, Greenhalgh T. Explaining high and low performers in  
40 complex intervention trials: a model based on diffusion of innovations theory. *Trials*, 2015,  
41 16: 242  
42  
43  
44  
45  
46  
47  
48  
49  
50  
51  
52  
53  
54  
55  
56  
57  
58  
59  
60

**Appendix 1: Key intervention components and anticipated outcomes**

| <b>Cyclical Activities</b>                                                                                                                                                                                                                                                                                                                                                                                                                                                                                                                                                                                                                                                                                                                                                                                                                                                                                                                                                                                                                                                                                                                                                                                                                                                                                                                                                                                                      | <b>Facilitative Processes</b>                                                                                                                                                                                                                                                                                                                                                                                                                                                                                                                                                                                                                                                                                                                                                                                                                                                                                                                                                                                                                                                                                                                                                                                                                                                                                                                                                                                                                  | <b>Anticipated outcomes</b>                                                                                                                                                                                                                                                                                                                                                   |
|---------------------------------------------------------------------------------------------------------------------------------------------------------------------------------------------------------------------------------------------------------------------------------------------------------------------------------------------------------------------------------------------------------------------------------------------------------------------------------------------------------------------------------------------------------------------------------------------------------------------------------------------------------------------------------------------------------------------------------------------------------------------------------------------------------------------------------------------------------------------------------------------------------------------------------------------------------------------------------------------------------------------------------------------------------------------------------------------------------------------------------------------------------------------------------------------------------------------------------------------------------------------------------------------------------------------------------------------------------------------------------------------------------------------------------|------------------------------------------------------------------------------------------------------------------------------------------------------------------------------------------------------------------------------------------------------------------------------------------------------------------------------------------------------------------------------------------------------------------------------------------------------------------------------------------------------------------------------------------------------------------------------------------------------------------------------------------------------------------------------------------------------------------------------------------------------------------------------------------------------------------------------------------------------------------------------------------------------------------------------------------------------------------------------------------------------------------------------------------------------------------------------------------------------------------------------------------------------------------------------------------------------------------------------------------------------------------------------------------------------------------------------------------------------------------------------------------------------------------------------------------------|-------------------------------------------------------------------------------------------------------------------------------------------------------------------------------------------------------------------------------------------------------------------------------------------------------------------------------------------------------------------------------|
| <p>-Patient Measure of Organisational Safety (PMOS) - a 44 item questionnaire which asks patients at the hospital bedside about safety concerns and issues [5, 6].</p> <p>-The second is a reporting proforma for patients to provide detailed safety incidents or positive experiences [7].</p> <p>-The questionnaire items are theoretically-informed from a systems understanding of patient safety whereby experience of care is understood to arise from a complex interaction of factors that include staff team-working and access to resources as well as more traditionally-considered factors such as the physical environment</p> <p>- After patient feedback has been collected it is collated and presented in a feedback report to each ward. Ward staff are then asked to interpret this feedback to identify and target areas for improvement. Finally they are asked to implement agreed action plans and monitor progress in a cyclical manner.</p> <p>- Significant further detail about the cyclical activities is contained in the published protocol of the study [8] and the PRASE RCT results paper [9]</p> <div data-bbox="264 1029 761 1337" data-label="Diagram"> <pre> graph TD     A[Measurement of ward safety] --&gt; B[Feedback to wards]     B --&gt; C[Interpretation in Action Planning Meeting]     C --&gt; D[Implementation of actions &amp; monitoring]     D --&gt; A     </pre> </div> | <p>The design of PRASE recognises that ward staff need support to implement the intervention. An understanding of some of the facilitative processes required was derived from a feasibility study, prior to finalising its design [7]. Specific facilitative processes involved are:</p> <ul style="list-style-type: none"> <li>- <i>Independent collection of patient feedback by the research team</i> to enable not only objectivity but from a resource and logistics viewpoint as ward staff do not have the capacity to collect this data themselves</li> <li>- <i>Independent production of feedback reports by research team</i></li> <li>- <i>Negotiation with senior management</i> by the research team to embed the intervention into usual practice</li> <li>- <i>Ward staff training</i> in interpretation of data and role playing of optimum action planning to enable them to tackle systemic issues effectively</li> <li>- <i>Facilitation of the action planning meetings by a senior researcher</i> to i) convene the meeting ii) encourage ward staff to devise action plans which tackle systemic issues</li> <li>- <i>Motivation of staff and cross team learning and support</i> via the format of three pan Trust meeting involving representatives from the hospital senior management (Start Up meeting pre-trial, Mid-Point meeting half way through trial, Closing meeting after trial had concluded)</li> </ul> | <p>It was hypothesized that the intervention would lead to safety improvements in terms of both ward culture and ward performance (distal outcomes) alongside a development of a shared, collaborative understanding of the patient's perspective of safety (proximal outcomes). For more detail on this, consult the logic model developed from the feasibility work [7]</p> |

**Appendix 2: Trial design and results**

| <b>Trial design</b>                                                                                                                                                                                                                                                                                                                                                                                                                                                                                                                                                                                                                                                                                                                                                                                                                                                                                                                                                                                                                                                                                                                                                                                                                                                | <b>Trial results</b>                                                                                                                                                                                                                                                                                                                                                                                                                                                                                                                                                             |
|--------------------------------------------------------------------------------------------------------------------------------------------------------------------------------------------------------------------------------------------------------------------------------------------------------------------------------------------------------------------------------------------------------------------------------------------------------------------------------------------------------------------------------------------------------------------------------------------------------------------------------------------------------------------------------------------------------------------------------------------------------------------------------------------------------------------------------------------------------------------------------------------------------------------------------------------------------------------------------------------------------------------------------------------------------------------------------------------------------------------------------------------------------------------------------------------------------------------------------------------------------------------|----------------------------------------------------------------------------------------------------------------------------------------------------------------------------------------------------------------------------------------------------------------------------------------------------------------------------------------------------------------------------------------------------------------------------------------------------------------------------------------------------------------------------------------------------------------------------------|
| <p>PRASE was trialled within a multi-centre, cluster, randomised controlled trial. The study was undertaken across 33 hospital wards in three NHS Trusts (five hospital sites). Seventeen wards were randomly assigned to an intervention group and 16 wards to a control group. Feedback was collected from approximately 25 patients per ward, collated and fed back to staff for interpretation and action planning. This whole process was then repeated in a second cycle so staff were able to see changes to feedback over time.</p> <p>The study was powered to detect a small to medium difference (0.3) between the intervention and control groups with respect to a Primary Outcome which was the Patient Safety Thermometer (PST). PST data is routinely collected from every ward in England on a monthly basis and reports on harm free care associated with: i) pressure ulcers, ii) venous thromboembolisms, iii) catheter associated urinary tract infections and iv) falls. PMOS was chosen as a secondary outcome. This was obtained twice from the intervention wards within their intervention cycles. It was also taken at the same three time points in the control wards.</p> <p>For further detail, consult Sheard et al (2014) [8].</p> | <p>No significant effect of the intervention between the allocation groups was found for either of the primary outcomes PST (<math>p=0.98</math>) or PMOS (<math>p=0.09</math>) at 6 or 12 months, nor other secondary outcomes. However, a post hoc analysis on new harms (contained in the PST) found a non-significant increase in harm free care of 1.60 for intervention wards over control wards. All wards were retained throughout the trial. Patient response rate for completing the PMOS tool was 86%.</p> <p>For further detail, consult Lawton et al (2017) [9]</p> |



### Appendix 3 - Holly ward pen portrait

Facilitator's field notes

Phase one – The action planning meeting (APM) consisted of five staff who had all read the report before the meeting. These were: a sister, a staff nurse, a ward clerk and two HCAs. The ward manager had attended the Trust wide PRASE start-up session but was not able to come to the APM so the facilitator had to give an extensive introduction about the study to the group. The ward clerk did not understand what the term 'patient safety' meant so the facilitator had to go back to basics to make sure that everyone in the room knew what PRASE was about.

Taped APM discussion

Facilitator's field notes

The APM was difficult to convene as discussion tended to jump around. The ward clerk was very vocal and the rest of the group seemed to defer to her opinion, even the sister! Overall, this was a positive meeting and the group seemed engaged with the study by the end of it. The main action plan was to explore whether better systems/communication could be put in place between theatre and the ward to try to reduce the amount of patients who are starved all day only to have their operation cancelled at the last moment. This action plan was challenging in its approach as it sought to redesign well established systems.

Follow up phone interviews

The phone interview found that the action plan about changing the system of communication between theatre and ward was not realised at all because the theatre matron had not responded to the sister about this despite the sister requesting to meet about the issue several times.

Follow up phone interviews

Phase two – The sister attended the Trust wide PRASE midpoint meeting and reported that she found it useful especially to see that many of the problems which patients were reporting on her ward were the same across other wards in the Trust.

Taped APM discussion

Facilitator's field notes

The sister convened another APM although this was smaller in size than the APM in phase one. The failed action plan from phase one about improving communication between theatre and the ward was discussed again. There is acknowledgement that there are not enough qualified staff at night who are able to put a central line in and this is having a knock on effect on the ward.

1  
2  
3 An action plan was developed to talk to the central line team about this  
4 problem of lack of qualified staff.  
5  
6  
7

8  
9 Follow up phone  
10 interviews  
11

12 The follow up phone interview for this phase found that implementation had  
13 floundered. The APG were far reaching in what they want to happen but were  
14 dependent on other departments for buy in and the interest from personnel in  
15 other departments was just not there. The sister reported via the phone  
16 interview that the Trust are not interested in training more people to be  
17 qualified in putting central lines in and the theatre matron is still not interested  
18 in rectifying the issue of patients being starved on the ward for days at a time.  
19 This ward seemed to be less involved in other safety, quality and experience  
20 initiatives than other wards were (even at the same Trust).  
21  
22

23  
24  
25 Facilitator's field  
26 notes  
27

28 The sister was came in on her day off to attend the Trust wide Closing  
29 meeting. She was firmly committed to the study throughout and indeed to  
30 improving patient safety.  
31

32 **Engagement profile:** This ward team did everything that was asked of them and they were  
33 highly engaged as a group with the purpose of PRASE. They made some far reaching action  
34 plans which sought to challenge underlying structural barriers but made little progress with  
35 these when they tried to implement them as other departments on which they depended for  
36 buy in were not interested. **Engaged throughout despite organisational setbacks.**  
37  
38  
39  
40  
41  
42  
43  
44  
45  
46  
47  
48  
49  
50  
51  
52  
53  
54  
55  
56  
57  
58  
59  
60

Appendix 4 – Diagram of engagement typologies

1  
2  
3  
4  
5  
6  
7  
8  
9  
10  
11  
12  
13  
14  
15  
16  
17  
18  
19  
20  
21  
22  
23  
24  
25  
26  
27  
28  
29  
30  
31  
32  
33  
34  
35  
36  
37  
38  
39  
40  
41  
42  
43  
44  
45  
46  
47

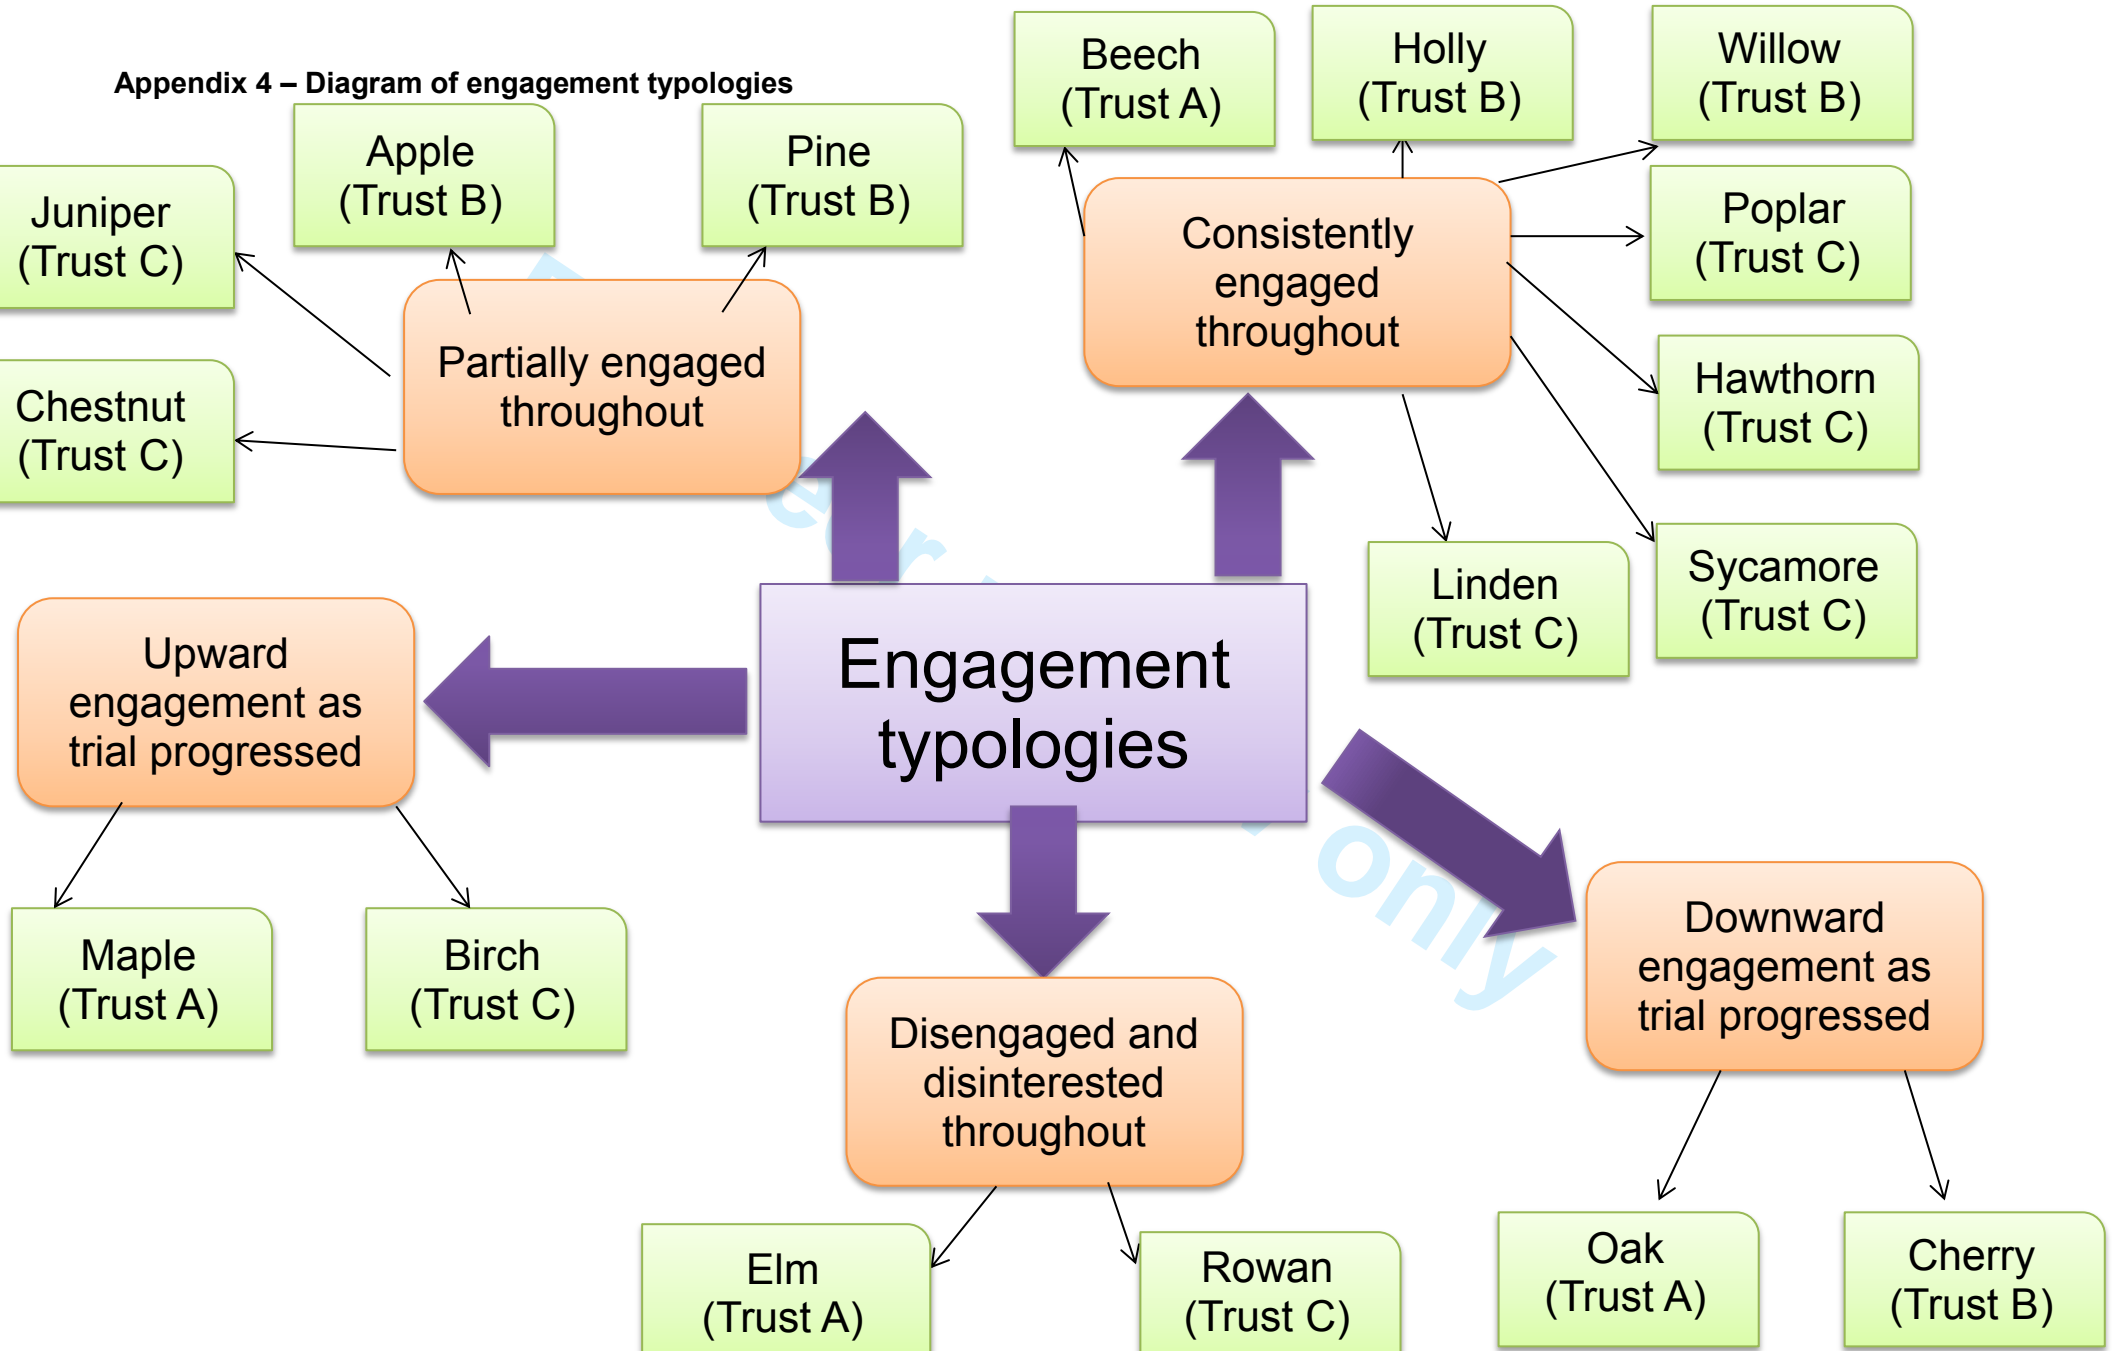

# BMJ Open

## Exploring how ward staff engage with the implementation of a patient safety intervention: A qualitative process evaluation

|                                 |                                                                                                                                                                                                                                                                                                                                                                                                                                                                                          |
|---------------------------------|------------------------------------------------------------------------------------------------------------------------------------------------------------------------------------------------------------------------------------------------------------------------------------------------------------------------------------------------------------------------------------------------------------------------------------------------------------------------------------------|
| Journal:                        | <i>BMJ Open</i>                                                                                                                                                                                                                                                                                                                                                                                                                                                                          |
| Manuscript ID                   | bmjopen-2016-014558.R2                                                                                                                                                                                                                                                                                                                                                                                                                                                                   |
| Article Type:                   | Research                                                                                                                                                                                                                                                                                                                                                                                                                                                                                 |
| Date Submitted by the Author:   | 31-Mar-2017                                                                                                                                                                                                                                                                                                                                                                                                                                                                              |
| Complete List of Authors:       | Sheard, Laura; Bradford Institute for Health Research, Marsh, Claire; Bradford Institute for Health Research O'Hara, Jane; Bradford Institute for Health Research; University of Leeds, Medical Education<br>Armitage, Gerry; University of Bradford Faculty of Health Studies<br>Wright, John; Bradford Institute for Health Research<br>Lawton, Rebecca; University of Leeds, Institute of Psychological Sciences; Bradford Institute for Health Research, Quality and Safety Research |
| <b>Primary Subject Heading</b>: | Health services research                                                                                                                                                                                                                                                                                                                                                                                                                                                                 |
| Secondary Subject Heading:      | Qualitative research                                                                                                                                                                                                                                                                                                                                                                                                                                                                     |
| Keywords:                       | Organisation of health services < HEALTH SERVICES ADMINISTRATION & MANAGEMENT, Quality in health care < HEALTH SERVICES ADMINISTRATION & MANAGEMENT, QUALITATIVE RESEARCH                                                                                                                                                                                                                                                                                                                |
|                                 |                                                                                                                                                                                                                                                                                                                                                                                                                                                                                          |

SCHOLARONE™  
Manuscripts

only

1  
2  
3 Exploring how ward staff engage with the implementation of a patient  
4 safety intervention: A qualitative process evaluation  
5  
6

7 Laura Sheard  
8 laura.sheard@bthft.nhs.uk  
9 Bradford Institute for Health Research, United Kingdom  
10

11 Claire Marsh  
12 claire.marsh@bthft.nhs.uk  
13 Bradford Institute for Health Research, United Kingdom  
14

15 Jane O'Hara  
16 jane.o'hara@bthft.nhs.uk  
17 Bradford Institute for Health Research & University of Leeds, United Kingdom  
18

19 Gerry Armitage  
20 g.r.armitage@brad.ac.uk  
21 University of Bradford, United Kingdom  
22

23 John Wright  
24 john.wright@bthft.nhs.uk  
25 Bradford Institute for Health Research, United Kingdom  
26

27 Rebecca Lawton  
28 r.j.lawton@leeds.ac.uk  
29 Bradford Institute for Health Research & University of Leeds, United Kingdom  
30

31 Corresponding author:  
32 Laura Sheard  
33 Bradford Institute for Health Research  
34 Bradford Teaching Hospitals  
35 Bradford Royal Infirmary  
36 Duckworth Lane  
37 Bradford  
38 BD9 6RJ  
39 United Kingdom  
40  
41  
42  
43  
44  
45  
46  
47  
48  
49  
50  
51  
52  
53  
54  
55  
56  
57  
58  
59  
60

## ABSTRACT

*Objectives* – A patient safety intervention was tested in a 33 ward randomised controlled trial. No statistically significant difference between intervention and control wards was found. We conducted a process evaluation of the trial and our aim in this paper is to understand staff engagement across the 17 intervention wards.

*Design* – Large qualitative process evaluation of the implementation of a patient safety intervention.

*Setting and participants* – NHS staff based on 17 acute hospital wards located at five hospital sites in the North of England.

*Data* – We concentrate on three sources here: i) analysis of taped discussion between ward staff during action planning meetings ii) facilitators' field notes iii) follow up telephone interviews with staff focussing on whether action plans had been achieved. The analysis involved the use of pen portraits and adaptive theory.

*Findings* – First, there were palpable differences in the ways that the 17 ward teams engaged with the key components of the intervention. Five main engagement typologies were evident across the life course of the study: consistent, partial, increasing, decreasing and disinterested. Second, the intensity of support for the intervention at the level of the organisation does not predict the strength of engagement at the level of the individual ward team. Third, the standardisation of facilitative processes provided by the research team does not ensure that implementation standardisation of the intervention occurs by ward staff.

*Conclusions* - A dilution of the intervention occurred during the trial because wards engaged with PRASE in divergent ways, despite the standardisation of key components. Facilitative processes were not sufficiently adequate to enable intervention wards to successfully engage with PRASE components.

**STRENGTHS AND LIMITATIONS OF THIS STUDY**

- We devised a process evaluation that had several robust qualitative data collection methods which complemented each other, in order to build a comprehensive and holistic picture of how ward staff implemented the intervention
- Our approach allowed us to reveal how the differing ways in which staff teams engage with the intervention may impact on patient safety changes at a ward level
- Our novel analytic approach utilised pen portrait methodology in a differing way to how it has previously been used in health services research, in order to document the journey of 17 wards interacting with an intervention over an 18 month period
- We have little understanding of whether the implementation of PRASE may have gained traction and fuelled subsequent ward based change once the research team left the field
- The qualitative methods we chose were designed to capture a broad understanding of the contexts in which the intervention was implemented but had we known a priori that engagement was such a significant factor, we may have designed the process evaluation to specifically explore its influence.

## BACKGROUND

Measurement of patient safety has traditionally relied on information from staff such as incident reports or recording information about harms such as falls or pressure sores. Recently, patients have been emphasised as being an important detector for patient safety and likened to the 'smoke detectors' of safety [1]. There is an increasing recognition that hospitals need to find better ways to capture and respond to the concerns of patients regarding the quality and safety of their care [2-4]. However, patients are rarely asked about structural or procedural aspects of care which may contribute towards failures in patient safety. The Yorkshire Quality and Safety group have developed a patient safety intervention called Patient Reporting and Action for a Safe Environment (PRASE). This intervention firstly elicits patient perceptions on how a ward is performing on a series of issues which are known to contribute towards patient safety incidents and secondly assists staff to interpret patient feedback to aid service improvements. This paper provides an account of a qualitative process evaluation of a randomised controlled trial (RCT) where PRASE was tested. PRASE was designed [5, 6], tested for feasibility [7] and trialled [8, 9] between 2010 and 2015. This period has been charted as an era of paradigm shift for patient safety research when the dominant 'measure and manage' orthodoxy has been enriched by approaches sensitive to setting and socio-cultural/ political influences [10]. It became essential for a process evaluation to capture the nuances involved in the PRASE implementation.

Process evaluations have been used to explain sub-optimum outcome effects, specifically whether there was a 'fault' with the intervention itself, its key components or with delivery [11]. Latterly, they are often not only concerned with adherence to original plans, but also with broader issues such as unintended consequences or the strengths and weaknesses of the intervention itself [12]. Some process evaluations have been able to identify a precise 'pinch point' or problem with an essential component of the intervention that caused it to fail. In a UK trial of peer led HIV prevention for gay men in London, no effect was shown. A qualitative process evaluation [13] revealed that the essential component of 'peer educator' had not played out as intended during the course of the trial due to recruitment problems and the inability of peer educators to confidently communicate harm reduction messages to intended targets. Other process evaluations have been able to point to more general cultural or structural reasons why an intervention may not have succeeded. Dixon-Woods et al [14] evaluated why a U.S. developed patient safety intervention - regarding decreasing central line infections in intensive care units - struggled with implementation after the intervention was transferred to a U.K. setting. A post-hoc qualitative evaluation revealed multiple reasons why, largely the result of cultural differences between the U.S and U.K. settings. It is clear from these examples that process evaluations can support the largely 'experimental' aim of RCTs by identifying specific 'pinch points' within an intervention itself or within the context that will help to explain success or failure.

The components of the intervention have been reported in detail elsewhere [8], and the results of the randomised controlled trial which demonstrated no statistically significant effect between the intervention and control wards [9]. A feasibility study was undertaken prior to commencement of the full RCT and details of our logic model and moderating factors are reported in the feasibility write up [7]. Here, we provide a synopsis of the intervention and results of the trial for the reader to be able to view our process evaluation in context. Appendix 1 provides a detailed summary of the cyclical activities and facilitative processes of the intervention that were trialled, alongside anticipated outcomes. Appendix 2 describes the trial design and results. Briefly, this was a cyclical study with two phases of: i) collecting patient feedback about safety from patients at the bedside ii) collation of this data and ward staff interpreting it iii) ward staff action planning to improve patient safety iv) plans then being implemented and monitored.



## METHODS

We conducted a robust process evaluation involving differing qualitative and quantitative methods [8] which gathered comprehensive data about all 17 intervention wards. We drew upon a published framework [12] for designing process evaluations of cluster randomised controlled trials. The main a priori research question was: 'where does the intervention work, how and why?' [8]. In this paper, we have chosen to focus on the 'how?' and 'why?' and present a detailed picture of how staff engaged with the intervention. We now apply our original research question to understand how and why the intervention did *not* work, given the intervention did not have a significant effect on outcomes. Six mixed methods were used in the wider process evaluation but due to the extent and depth of the data collected, we focused intensively on three qualitative methods for the purpose of this paper. The methods described below are those most pertinent to exploring how staff engaged with the intervention in the ways they did, and why. Data was collected between August 2013 to November 2014. NHS ethical approval was granted in March 2013.

### *1. In depth analysis of taped discussion between ward staff*

Action planning meetings (APMs) were digitally recorded for all 17 wards at both phases. At phase two, one ward did not meet so we considered the recordings of 33 APMs. These ranged in length from 27 to 80 minutes (average 43 minutes). Our examination focused on which areas of patient feedback staff chose to make action plans on and which areas they chose not to. We wrote detailed notes whilst listening to the voice file. We structured our notes under the headings: i) Issues seen as important where actions were made (and why) ii) Issues seen as important where no actions were made (and why not) iii) Issues dismissed and reasons for this iv) Comments made by staff about PRASE process/ study/ team v) Comments made by staff about the ward or hospital context.

### *2. Facilitator's field notes*

These notes were written shortly after the APM had finished and captured: i) implicit dynamics between staff, such as body language, tone of voice and other non-verbal cues ii) environmental factors, such as descriptions of the physical space where the meeting was held iii) facilitator's overall impressions. Field notes were brief and gave a 'snapshot' of the meeting. There were three facilitators across the 17 intervention wards and each facilitator worked with the same wards across both phases of the study, to ensure continuity. Field notes were also taken at key meetings and events held with Trust senior management personnel (particularly during set up and roll out of the study). These notes assisted in providing the research team with tacit knowledge of the culture of the site in which the intervention was being implemented.

### *3. Follow-up telephone interviews conducted with the APM lead*

The purpose of these short, structured phone interviews was to ascertain whether action plans had been successfully implemented or not and why. They were conducted around six months after the APM, with the 'PRASE lead' for each ward. Each ward was responsible for nominating a named member of ward staff - who was part of the action planning meeting - to be the PRASE lead. This could be any member of the team but was more often than not the person who volunteered for the role was a senior nurse. A structured interview guide was used. Researchers had a proforma in front of them which contained details about each action plan per ward and they asked the PRASE lead whether each action plan had been implemented – yes, no or partially. Open questioning then continued to understand the factors surrounding this. Five additional questions were asked which focussed on the PRASE lead's opinion of the facilitative processes embedded in the study.

For the purpose of this paper, we wanted to understand **qualitatively** how wards had engaged (or not) with the PRASE intervention. Implementation fidelity (which captures adherence to specific intervention components) is reported quantitatively elsewhere [9]. Engagement of staff with an intervention can be considered as closely aligned but different

1  
2  
3 from this, referring more to the differing approaches and attitudes that staff take to the task in  
4 hand (implementation of different components of the intervention). This is different to  
5 whether they have simply delivered the task or not. We decided not to adhere to a  
6 numerical/scale definition of 'engagement' whereby differing wards attained a binary  
7 definition of either 'engaged' or 'disengaged' with the intervention. Instead, we undertook a  
8 nuanced analysis of staff approaches and attitudes to: conducting an action planning  
9 meeting, creating quality action plans and implementation of these action plans. We  
10 explored 'engagement' as a concept that we define as the 'depth' and 'nature' of ward teams'  
11 approaches and attitudes to the intervention.  
12

13 Informed by this understanding of engagement, a synthesis of the above data sources has  
14 provided us with a rich account of the '**engagement trajectory**' of each ward and this was  
15 realised by creating a pen portrait of engagement. Pen portraits have been used previously  
16 in applied health research in fields as diverse as: end of life care [15], vulnerable old people  
17 being enabled to keep warm in their homes [16] and sleeping practices amongst homeless  
18 drug users [17]. Previously, they have provided a narrative account of a 'typical' participant in  
19 qualitative studies or as an analytic aide memoir. We used them in a slightly different manner  
20 to document the 'journey' of the wards throughout the trial from the perspective of the  
21 researcher who had worked closely with these wards for over 18 months. There is a lack of  
22 methodological literature pertaining to the construction of a pen portrait and this has been  
23 left to the discretion of individual research teams. We created a basic structure for the pen  
24 portraits which centred on the writing of a linear, longitudinal account of how each ward had  
25 engaged with relevant key components of the intervention and the contextual factors which  
26 influenced this, ensuring that all three data sources were drawn upon. We did not use an  
27 existing theory or framework on which to extract the data for the pen portraits as we wanted  
28 the emergent findings to arise inductively from the data set. As staff engagement was our  
29 focus, we included as much material on this as possible (along with explanatory factors and  
30 necessary description). We excluded minutiae which did not add to the 'big picture' of the  
31 ward team's engagement to maintain a focussed pen portrait. The pen portrait for Holly ward  
32 is shown in Appendix 3 with the prose annotated as an illustration of how portraits were  
33 constructed from the three data sources outlined above.  
34

35 Researchers took into account all the information contained within the pen portrait and  
36 attributed an overall 'engagement trajectory' label to each ward. Author A wrote all pen  
37 portraits for Trusts A and B and Author B for Trust C. We categorised the 17 different ward  
38 engagement trajectories into five main 'engagement typologies', which emerged from an  
39 analytical session centring mainly on consensus discussion between Author A and Author B.  
40 We report three overarching themes in this paper, which are described in detail in the  
41 Findings section which follows. The above categorisation of engagement typologies led to  
42 the content of the first theme. After we were confident of the findings of this first theme, we  
43 then used the differences in engagement detailed in this theme to progress to themes two  
44 and three. To achieve this, we looked between and across the engagement trajectories of all  
45 17 wards in order to understand how engagement with the intervention related to  
46 components of local implementation. We returned to the detail of the pen portraits to  
47 understand commonality and difference and from this we developed the coding framework  
48 for themes two and three. We then checked our assumptions by testing the data in the pen  
49 portraits against our initial coding framework. After minor adaptations, we then coded the data  
50 in all 17 pen portraits. Overall, we used techniques derived from 'adaptive theory' [18] which  
51 allows for high level frameworks and conceptualisations to emerge from data rather than  
52 descriptive themes. Adaptive theory proposes a continual engagement between the arising  
53 empirical data and arising theoretical interpretations of the research, working in a continuous  
54 cycle with each cycle generating new explorations.  
55  
56  
57  
58  
59  
60

## FINDINGS

We now set out to understand the ways in which the 17 intervention wards engaged with the intervention. We are interested in how a multiplicity of engagement styles could have made an already complex intervention become hyper complicated in its implementation phase. This 'hyper complexity' may have served to dilute key elements of the intervention. By 'dilution' we mean 'non-standardisation' of the intervention group, thereby reducing the potential for this to be meaningfully compared with a control group. We explore three high level themes, which emerged from the data. Firstly, we will describe how there were palpable differences in the ways that ward teams engaged with the intervention. Next, we will look at how support for the intervention at the level of the Trust does not indicate ward level support. Lastly, we will demonstrate that standardisation of facilitative processes by the research team does not ensure this filters down to implementation standardisation by ward staff. All quotation extracts are taken from pen portrait notes and all ward names have been ascribed a pseudonym.

### *1. The same intervention can be interacted with in highly divergent ways*

We were able to distinguish the intervention wards into five main 'engagement typologies' (Appendix 4). They are:

- Consistently engaged throughout (7 wards)
- Partially engaged throughout (4 wards)
- Increasing engagement as trial progressed (2 wards)
- Decreasing engagement as trial progressed (2 wards)
- Disengaged and disinterested throughout (2 wards)

Consistently engaged – This represents the largest category of how wards chose to participate in the trial with 7 out of the 17 residing here. These wards were fully signed up to the ethos of listening to and acting on patient feedback. They took part in a high proportion of the key components of the cyclical activities and made quality action plans which were largely implemented in both phases. A quality action plan can be defined as one which seeks to address issues identified in the patient data and was realistic, relatively timely and more than likely to be achieved. Motivation to take part in the research was high and improving patient safety was even higher.

Partially engaged – These four wards generally did everything asked of them by the research team and largely participated in intervention components but were sometimes lacklustre in their motivation towards improving patient safety. At times, it felt like action planning was just 'going through the motions'. The ability of staff to implement action plans was mixed although this was sometimes due to external factors rather than inertia on the part of the ward staff themselves.

Increasing engagement – These two wards began their involvement with the trial in an ambivalent and – in the case of Maple ward – even hostile manner. However, as the study progressed and the ward staff began to understand what the research team were trying to achieve, engagement with the study solidified. The similarity between these two wards (despite being at different Trusts) is that the turning point for their engagement was attendance at the peer centred Mid-Point Meeting. This is reflected in Maple ward's complete U-turn with implementation of quality action plans at phase two as compared with partial implementation of weak action plans at phase one.

Decreasing engagement – Conversely, another two wards engaged with the study relatively well at the beginning but, over time, slipped in their level of interest and involvement. Cherry ward is the only ward across all 17 who did not meet in an APM in phase two. The follow up telephone interview revealed that the ward manager for Cherry did not believe the study was a priority. Oak ward had ambitious plans for their phase one action planning but had become

dejected by the amount of time their plan was taking to come into effect. Subsequently, they declined to make an action plan in the phase two APM and appeared disinterested in the study.

Disengaged and disinterested – Although these two wards met in APMs for both phases of the trial, they were not interested in using the PRASE data to improve patient safety and viewed the study as a burden. However, the reasons for this response differed. Rowan were a low performing ward whose ward manager preferred to concentrate on the other initiatives rather than our research study. Elm ward were outwardly hostile to the ethos of the study, critical of the comments their patients had made to researchers and defensive of staff members. Despite agreeing to hold an APM, they consistently refused to make action plans.

Through an examination of these differing engagement trajectories, we can unpick where parts of the intervention may have led to divergent strategies for local implementation of the intervention on a ward-by-ward basis. These findings from 'on the ground' implementation by ward teams directly contradict some of the core assumptions held by the research team at the outset of intervention development - namely, that by providing facilitative processes, wards would be able to implement in a uniform manner. It is this aspect of a chasm between implementation expectations and reality which we now turn our attention to.

## *2. Trust-level support for an intervention does not predict the strength of ward-level engagement*

A key assumption was that strong corporate, managerial-level support by the three participating Trusts would facilitate high-level engagement by wards. However an examination of the differing types of engagement trajectories, shown in Figure 1, throw doubt on this assumption and we can find little consistency in engagement style between the wards at the same Trust. For instance, Trust A is a small district general hospital in a semi-rural, affluent area. This Trust prides itself on being a forward thinking, cohesive workplace and senior management support for this intervention was exceptionally strong. However, when reduced down to the level of the ward, we can see that the four intervention wards at Trust A are represented across four distinct engagement trajectories (Consistent = Beech, Increasing = Maple, Decreasing = Oak, Disengaged = Elm). Engagement trajectories for each of the other two Trusts also differed considerably by ward. The implication here is that corporate culture - and receptivity to patient feedback at the level of the organisation - is not a simple predictor of engagement at ward level.

Unpicking these differences further, we find that despite a uniform message about the importance of a multi-disciplinary approach to the study, wards seem to have interpreted this differently. Oak ward convened a strong first multi-disciplinary APG with representatives from nursing, allied health professionals and support staff. In contrast, on some wards PRASE remained led and implemented by just one or two nursing staff. For example, Maple's first APG consisted of just the ward manager and pen portrait notes illustrate why:

*A very tense meeting held with just the ward manager who appeared overtly stressed and about to implode. It was clear at this first APM that the ward manager had not understood the purpose of the study and became upset by some of the negative comments which her patients had made in the report. It was a difficult APM to convene as the ward manager thought she had to solve everything by herself and this was partially reinforced by the fact that she had not invited any of her staff to the APM (Maple, Trust A)*

The research team never envisaged that the intervention would be taken on by just one or two members of ward staff and this was actively discouraged throughout but still persisted in five wards at phase one and six wards at phase two, across the 17 intervention wards. It is difficult to suggest a clear reason why this happened but it was often related to:

- Front line issues, such as no staff available to be released from direct patient care to attend APG
- A minority of ward managers viewing the study as yet another patient safety initiative that they just needed to 'get on with'
- A misunderstanding of the multi-disciplinary nature of the intervention.

Of most interest is the severe paucity of medical staff involved in the intervention with only four wards (all at Trust C) involving a medic. This was unforeseen at the outset and may have contributed to action plans that were narrower in scope than those generated by a strong MDT. Even those wards who managed to convene a strong multi-disciplinary APG in phase one were often not able to sustain this level of input going into phase two. Towards the end of the study, it was disappointing to see that PRASE had unwittingly become badged as a 'nursing initiative'. Medical and allied health professional input declined over time and the workload was disproportionately being shouldered by individual Ward Managers (managerial nurses) who were for the most part already overloaded in their daily clinical roles.

Furthermore, an assumption was that a tight, coherent and most importantly *consistent* group of staff would engage with the intervention throughout the 14 months of staff involvement. In reality, staff movement around the NHS estate was high. This led to difficulties regarding ownership of action planning with some staff reluctant to proceed with action plans devised by their predecessors and others not believing it was worth the effort to become involved in the study if they were moving on shortly. A few ward teams changed their personnel completely between phase one and two of the study due to managerial reorganisation:

*A massive change in staffing took place around the latter part of Phase one with a new Ward Manager and 80-85% change in ward staff. The second phone interview revealed that other ward initiatives were taking place...the whole PRASE process was never wholly embraced because of intense ward improvement work, and staff flux, taking place at the same time (Chestnut ward, Trust C)*

It was never anticipated that such wholesale change would take place at the level of the individual ward teams within the lifetime of the trial and the intervention was unprepared for this. There was little formal capacity to continually re-introduce PRASE to new ward staff, despite researchers having to perform this ad hoc and unexpected role. Critically, it points to ownership of the intervention on the ground as a key factor in success. The engagement with the intervention becomes weak if it is passed around large numbers of different staff or if staff groups change on a dramatic scale.

### *3. Standardisation of facilitative processes by the research team does not necessarily ensure implementation standardisation by ward staff*

A key intention of the facilitative processes was to ensure standardisation of implementation by ward staff. The process evaluation found that, in reality, these uniform training and facilitative processes resulted in little standardisation of approach to action planning regarding a) the issues which staff chose to focus on or b) whether the action plans were successfully implemented (or not). Our pen portraits point to three main issues that appear to underpin why:

- Implementation of action plans were often related to buy in and collegiate working with other departments, some of whom were not willing to spend time, resource and effort on an issue which was not their own
- Existing pan-Trust safety and quality campaigns were prioritised over and above PRASE, to differing degrees which variably helped or hindered PRASE intentions
- Success was often the result of a complex interplay between the personal will of the staff involved in the APG and whether the study fitted into current ward priorities

1  
2  
3  
4 The following pen portrait excerpt from Apple ward exemplifies the first identified issue  
5 regarding buy in from other departments. This ward had several negative comments from  
6 patients that pain relief was not being given in a timely manner. To address this, the APG  
7 decided they needed assistance from pharmacy but this was not forthcoming and APG  
8 members were disappointed. This led to the contradictory position in phase two of  
9 engagement still being very present but the act of action planning itself becoming tokenistic:  
10

11 *This ward stayed engaged with the project the entire way through despite setbacks with*  
12 *their earliest action plan. The ward manager in particular clearly understood the purpose*  
13 *of the study and was sympathetic to receiving patient feedback. However, inertia may*  
14 *have crept in as their 'outside the box' thinking in phase one did not get any buy in from*  
15 *the pharmacy department. Action planning in phase two then became perfunctory even*  
16 *though engagement was still high (Apple, Trust B)*  
17

18 The second issue of other safety campaigns being prioritised above this study relates to the  
19 capacity with which ward staff have within their normal clinical roles to be able to undertake  
20 improvement work. In several of the pen portraits, PRASE was described as “just one of  
21 many improvement initiatives which this ward are involved in”. Wards were under pressure  
22 to take part in hospital wide initiatives that executive teams had deemed to be of most  
23 importance. Whilst there was senior support for PRASE, it was not always significant in  
24 comparison to other initiatives. In some cases, the existence of other high profile campaigns  
25 supported staff in achieving their PRASE action plans. Trust C launched a well-received  
26 “Hello my name is...” patient experience campaign tying into national acknowledgement of  
27 the need for staff to introduce themselves and communicate better with patients at the  
28 bedside. On the wards where PRASE feedback had also drawn attention to this need, staff  
29 were supported to respond (through badges, awareness training and senior-support) to do  
30 so.  
31

32 However, the flip-side of attention on more high-profile campaigns meant that – for some  
33 wards – PRASE became sidelined. Associated with this was a feeling of patient safety and  
34 quality ‘fatigue’ with the amount of initiatives in this area felt too numerous and therefore  
35 burdensome on staff time:  
36

37 *I got the sense that the ward manager saw PRASE as just another audit which she*  
38 *needed to go through the motions of...At one point during phase two, she admitted*  
39 *that in phase one she did not see the value in the study as she thought it just*  
40 *replicated other patient experience measures her ward is involved in. However, now*  
41 *she appreciates how it is different from the other measures...Working out where*  
42 *PRASE fitted in with other initiatives seemed to be a big issue for this ward manager*  
43 *(Pine Ward, Trust B)*  
44

45 One strong finding to emerge was the use of PRASE data to reinforce safety or quality  
46 issues which the ward staff knew about tacitly but did not have robust data about in order to  
47 report to senior management. This finding emerged as a divisive issue. Some wards were  
48 pleased that the PRASE study reinforced staff opinion about the ward or validated on a  
49 larger scale the results of local audits. However, a minority of staff became irritated and  
50 instead viewed it as duplication.  
51  
52  
53  
54  
55  
56  
57  
58  
59  
60

## DISCUSSION

As introduced at the outset, some process evaluations are able to reveal specific 'pinch points' within the intervention itself [13], or within the overall setting in which it was applied [14], which help to explain why no effect was seen. The Consolidated Framework for Advancing Implementation Research advocates the 'inner setting' of an organisation as being influential in whether or not implementation can be achieved, where attention must be paid to the domains of: structural characteristics, networks and communications, culture, implementation climate [19]. Our process evaluation found that this inner setting was so varied between wards within the intervention group that this led to a general 'dilution' of intervention implementation. We found striking differences between wards across all the above domains of 'inner setting' – stability of ward teams, quality of relationships between different wards, basic assumptions towards receiving patient feedback and a learning climate (or lack of one). Significantly, we saw changes to the 'inner setting' constructs over time. The in-depth analysis of what happened within the intervention group generates useful insights for implementation of, and staff engagement with, patient safety initiatives to which we will now turn our attention.

The improvement of patient safety is already acknowledged as a cultural issue and the importance of factors such as teamwork, leadership and organisational processes operating at and between multiple levels [20]. Navigating this territory - particularly the link between 'sharp end' ward safety initiatives and 'blunt end' corporate planning - has been documented as a necessary challenge. Initiatives which do not pay adequate attention in this regard are at best destined to fail, and at worst may over-burden already de-motivated staff [21]. The facilitative processes incorporated into PRASE were designed to help address this challenge. These processes arose from the findings of feasibility testing of the intervention [7] where our research team found that, for example, access to senior management at regular intervals and assistance in interpreting patient feedback were important factors which may support action planning. The assumption was that by providing these processes, staff would be better placed to successfully navigate complex organisational territory. It was anticipated this would allow some uniformity amongst the intervention group. In actuality, the facilitative processes were not adequate to ensure any such uniformity.

Dixon-Woods et al (2011) [22] developed a post theorisation of why impressive results were seen in the original Michigan intervention - to decrease central line infections - in the U.S. Six reasons are proposed as to why the program worked. Of particular applicability is the 'creation of a networked community' where ward teams came together to build rapport and support for each other whilst identifying and resolving common barriers. Although part of the facilitative processes within the PRASE intervention aimed to attend to this need, it is likely that the community of wards involved in the study never reached a critical threshold in becoming an organic community who regularly reached out to each other. Further, specific leaders were targeted in the Michigan programme including hospital executives and clinical team leaders. This involvement of leaders at differing levels of the organisation is theorised as being integral to the success of the programme. Conversely, we found that involving senior management and matrons prior to the start of the study and then throughout its entirety had minimal effect on strengthening engagement with the intervention on the ground by frontline ward staff. Questions regarding the ability of senior management to support consistency of intervention adoption throughout an organisation, and the processes required to enable this further, were raised by our study and certainly warrant further exploration.

In this study, the relationships between different parts and levels of the organisation from senior management to ward teams to individuals were vital in achieving success. When these levels align well, as they appeared to do in one Trust - with respect to a culture shift around introducing and communicating to patients via an external patient experience campaign - it appears that much can be achieved. When they do not – e.g. Apple ward who did not get buy in from the pharmacy department - staff at the ward level can become

1  
2  
3 frustrated and demotivated. We therefore question the capacity of an externally designed  
4 intervention, even one with significant resources and facilitative processes, to provide the  
5 mechanisms to be continually adaptive to the organisational alignment between the sharp  
6 and blunt end at differing institutions. The challenges revealed here are about deeper  
7 organisational culture, systems and processes that need longer-term development.  
8  
9

10 Our findings support the growing understanding that emphasis in patient safety research  
11 must continue to shift from the measure and manage orthodoxy of data collection to  
12 interpretation and process [10]. In this research, the collection of patient feedback was the  
13 least problematic element. The complexity of what staff are being asked to do in  
14 interventions like PRASE (navigating multi-layered organisational systems to implement  
15 improvements) requires much more consideration. In the broader but related policy area of  
16 patient experience, the overt emphasis and huge resource allocated to collecting patient  
17 experience data has not been matched by efforts to utilise and evaluate the impact of  
18 feedback on service improvement [23]. There is increasing recognition that using data  
19 sources to change practice demands creativity and skills from staff; hence the tendency to  
20 present staff with data and expect change to happen as a result [24]. Our intervention  
21 considered these issues a priori and hence facilitative processes were built into the trial yet  
22 they were not sufficiently robust enough to ensure a standardised implementation across  
23 intervention wards.  
24

25 One interpretation of PRASE could be that it 'failed' due to showing no effect between the  
26 intervention and control wards. We believe this a simplistic view which does not take into  
27 account the wealth of positive benefits which patients and staff gained. Firstly, it showed that  
28 patients are able to give feedback about the safety and quality of care and that they want to  
29 do this en masse (our consent rate was 85% of those patients approached by researchers  
30 and the number of patients recruited to the study was 2400 across five different hospital  
31 sites). Secondly, the process evaluation showed that most staff *do* believe the patient voice  
32 is important and there is an imperative to listen to, and act on, this voice. Thirdly, despite  
33 local struggles, most staff do want to action plan to improve their patients' care. The majority  
34 of the wards were receptive to receiving patient feedback – it is when they tried to move  
35 improvement work forward that problems arose [25]. An additional gain which some staff  
36 identified was the ability of the patient feedback to allow staff to understand not only the  
37 patient perspective but also their priorities and to visualise the ward environment and  
38 systems 'through the eyes of the patient'.  
39

#### 40 *Limitations*

41 We cannot know whether positive attitudes towards patient involvement in patient safety  
42 have continued on the intervention wards after the trial was completed. Improvements that  
43 staff were working towards may have gained impetus since the research team left. Equally,  
44 involvement in the trial may have kick-started ideas which, although did not come to fruition  
45 within its life span, may now be fuelling ward level action. Conversely, staff may have felt  
46 disempowered to enact improvement to the ward environment if their PRASE action plans  
47 had floundered. We have no format for measuring this 'after effect' – either positive or  
48 negative – and little scope for knowing at what time point the evidence of a more long lasting  
49 effect may be captured.  
50

51  
52 Our pen portrait methodology is a culmination of all sources of qualitative data collected and  
53 has its inherent weaknesses. This methodology is still in its relative infancy in relation to the  
54 way in which we have utilised it here. We were careful to draw equally on all sources of data  
55 in order to build a comprehensive narrative of the engagement trajectory of each ward.  
56 However, a differing analysis paying attention to fewer sources or an unequal weighing of  
57 sources may have pulled the narrative account in a slightly different direction. Further, it was  
58 difficult to categorise some wards firmly into their allocated engagement typology and  
59  
60



1  
2  
3 arguably some could fit into several. Finally, process evaluation methods were developed a  
4 priori to the start of the trial so the design was very open. We devised a loose structure to  
5 capture qualitative intelligence on key trial processes. If prior knowledge existed that  
6 diversity of engagement within the intervention wards was to be so significant, it may have  
7 been possible to target a particular process evaluation framework for analysing outcomes in  
8 relation to this diversity, such as the 'diffusion of innovation model' [26]. It is a possibility that  
9 utilisation of differing methods may have provided other answers as to where different  
10 elements of the intervention worked, for whom and why.

## 11 12 **CONCLUSION**

13 Whereas previous process evaluations point towards specific pinch points or broader cultural  
14 issues to understand why an intervention showed no effect, this study points to an overall  
15 'dilution effect' of the intervention. This was largely due to wards engaging with the  
16 intervention in highly divergent manners despite the standardisation of key components by  
17 the research team. The facilitative processes were inadequate to ensure full engagement  
18 across all wards in the study. A disconnect existed between senior management support for  
19 the study and how ward staff on the ground engaged with it more locally. The above findings  
20 assist in explaining why the trial saw no effect between intervention and control wards.

## 21 22 23 **DECLARATIONS**

### 24 25 *Funding*

26 This study was funded by the National Institute for Health Research under its Programme  
27 Grants for Applied Research scheme ('Improving patient safety through the involvement of  
28 patients', RP-PG-0108-10049). The views expressed are those of the authors and not  
29 necessarily those of the NHS, the NIHR or the Department of Health

### 30 31 *Competing interests*

32 The authors declare they have no competing interests

### 33 34 *Authors' contributions*

35 RL, GA and JW are grant holders of the programme grant. LS devised the methodology of  
36 the process evaluation and wrote the qualitative protocol, with assistance from CM. LS, CM  
37 and JOH all collected data. LS and CM analysed and interpreted all data, with intellectual  
38 input from GA. LS and CM co-wrote the first draft of the paper. All authors edited the first  
39 draft of the paper. All authors read and approved the final manuscript.

### 40 41 *Ethics approval and consent to participate*

42 The study was approved by South Yorkshire NHS Research Ethics Committee on 15<sup>th</sup> March  
43 2013 (Ref: 13/YH/0077). All participants gave informed consent to take part in this study.

### 44 45 *Acknowledgements*

46 Thanks for Gemma Louch, Jane Heyhoe and Yvonne Birks for research assistance in  
47 conducting some of the telephone interviews

### 48 49 *Data sharing statement*

50 Unpublished data is not available

## 51 52 53 **FIGURE HEADINGS**

54 Appendix 1 – Key intervention components and anticipated outcomes  
55 Appendix 2 – Trial design and results  
56 Appendix 3 – Holly ward pen portrait  
57 Appendix 4 – diagram of engagement typologies

**REFERENCES**

1. Bacon N. A smoke-alarm for patient safety and healthcare quality. Neil Bacon Blog2010 [Web Log]. Retrieved June 2015. <http://neilbacon.wordpress.com/2010/12/13/a-smoke-alarm-for-patient-safety-and-healthcare-quality/>
2. Francis R: Report of the Mid Staffordshire NHS Foundation Trust Public Inquiry. London: The Stationery Office; 2013.
3. Berwick D: Improving the safety of patients in England. London: Department of Health; 2013.
4. Keogh B: Review into the quality of care and treatment provided by 14 hospital trusts in England: overview report. London: Department of Health; 2013.
5. Giles S, Lawton R, Din I, McEachan R: Developing a patient measure of safety (PMOS). *BMJ Quality & Safety* 2013, 22:554-562.
6. McEachan R, Lawton R, O'Hara J, et al: Developing a reliable and valid patient measure of safety in hospitals (PMOS): a validation study. *BMJ Quality & Safety* 2014, 23:565-573.
7. O'Hara J, Lawton R, Armitage G, et al. The Patient Reporting and Action for a Safe Environment (PRASE) Intervention: A feasibility study. *BMC Health Services Research*, 2016, 16:676
8. Sheard L, O'Hara J, Armitage G, et al. Evaluating the PRASE patient safety intervention-a multi-centre, cluster trial with a qualitative process evaluation: study protocol for a randomised controlled trial. *Trials*, 2014, 15: 420.
9. Lawton et al. Can patient involvement improve patient safety? A cluster randomized control trial of the Patient Reporting and Action for a Safe Environment (PRASE) Intervention. *BMJ Quality & Safety*, 2017, doi: 1136/bmjqs-2016-005570
10. Lamont T & Warring J. Safety lessons: shifting paradigms and new directions for patient safety research *Journal of Health Services Research and Policy* 2015, 20 (15) 1-8
11. Oakley A, Strange V, Bonell C et al: Process evaluation in randomised controlled trials of complex interventions. *BMJ* 2006, 332:413-416.
12. Grant A, Treweek S, Dreischulte T et al. Process evaluations for cluster randomised trials of complex interventions: a proposed framework for design and reporting. *Trials*, 2013, 14:15
13. Elford J, Sherr L, Bolding G et al. Peer led HIV prevention among gay men in London: process evaluation *AIDS care* 2002, 14 (3) 351-360
14. Dixon-Woods M, Myles L, Tarrant C, Bion J. Explaining Matching Michigan: an ethnographic study of a patient safety program *Implementation Science* 2013, 8:70

- 1  
2  
3 15. Pleschberger S, Seymour J, Payne S, et al. Interviews with end of life care for older  
4 people: reflections on six European studies *Qualitative Health Research* 2011, 21 (11) 1588-  
5 1600  
6  
7 16. Tod A, Lusambili A, Homer C et al. Understanding the factors influencing vulnerable older  
8 people keeping warm and well in winter: a qualitative study using social marketing  
9 techniques. *BMJ Open* 2012  
10  
11 17. Nettleton S, Neale J, Stevenson C. Sleeping at the margins: a qualitative study of  
12 homeless drug users who stay in emergency hostels and shelters. *Critical Public Health*  
13 2012, 22 (3) 319-328  
14  
15 18. Layder D: *Sociological Practice: Linking Theory and Research*. London: Sage; 1998.  
16  
17 19. Damschroder L, Aron D, Keith R et al. Fostering implementation of health services  
18 research findings into practice: a consolidated framework for advancing implementation  
19 science *Implementation Science*, 2009, 4:50  
20  
21 20. Taylor S, Dy S, Foy R et al. What context features might be important determinants of  
22 effectiveness of patient safety practice interventions? *BMJ Quality & Safety*, 2011, 20: 611-  
23 617  
24  
25 21. Dixon-Woods M, Baker R, Charles K, et al. Culture and behaviour in the English National  
26 Health Service: an overview of lessons from a large multi method study. *BMJ Quality &*  
27 *Safety* 2014, 23, 106-115  
28  
29 22. Dixon-Woods M, Bosk C, Aveling E et al. Explaining Michigan: Developing an ex post  
30 theory of a quality improvement program. *Milbank Quarterly*, 2011, 89 (2) 167-205  
31  
32 23. Coutler, A. et al. (2014). Collecting data on patient experience is not enough: they must  
33 be used to improve care. *BMJ*, doi: <http://dx.doi.org/10.1136/bmj.g2225/>  
34  
35 24. Gkeredakis, E. et al. Mind the Gap: understanding utilisation of evidence and policy in  
36 health care management practice. *Journal of Health Organization and Management*, 2011,  
37 25(3), pp. 298-314.  
38  
39 25. Sheard L, Marsh C, O'Hara J t al. The Patient Feedback Response Framework –  
40 Understanding why UK hospital staff find it difficult to make improvements based on patient  
41 feedback: A qualitative study. *Social Science & Medicine*, 2017, 178, 19-27  
42  
43 26. McMullen H, Griffiths C, Leber W, Greenhalgh T. Explaining high and low performers in  
44 complex intervention trials: a model based on diffusion of innovations theory. *Trials*, 2015,  
45 16: 242  
46  
47  
48  
49  
50  
51  
52  
53  
54  
55  
56  
57  
58  
59  
60

### Appendix 1: Key intervention components and anticipated outcomes

| <b>Cyclical Activities</b>                                                                                                                                                                                                                                                                                                                                                                                                                                                                                                                                                                                                                                                                                                                                                                                                                                                                                                                                                                                                                                                                                                                                                                                                                                                                                                                                                                                                                   | <b>Facilitative Processes</b>                                                                                                                                                                                                                                                                                                                                                                                                                                                                                                                                                                                                                                                                                                                                                                                                                                                                                                                                                                                                                                                                                                                                                                                                                                                                                                                                                                                                                  | <b>Anticipated outcomes</b>                                                                                                                                                                                                                                                                                                                                                   |
|----------------------------------------------------------------------------------------------------------------------------------------------------------------------------------------------------------------------------------------------------------------------------------------------------------------------------------------------------------------------------------------------------------------------------------------------------------------------------------------------------------------------------------------------------------------------------------------------------------------------------------------------------------------------------------------------------------------------------------------------------------------------------------------------------------------------------------------------------------------------------------------------------------------------------------------------------------------------------------------------------------------------------------------------------------------------------------------------------------------------------------------------------------------------------------------------------------------------------------------------------------------------------------------------------------------------------------------------------------------------------------------------------------------------------------------------|------------------------------------------------------------------------------------------------------------------------------------------------------------------------------------------------------------------------------------------------------------------------------------------------------------------------------------------------------------------------------------------------------------------------------------------------------------------------------------------------------------------------------------------------------------------------------------------------------------------------------------------------------------------------------------------------------------------------------------------------------------------------------------------------------------------------------------------------------------------------------------------------------------------------------------------------------------------------------------------------------------------------------------------------------------------------------------------------------------------------------------------------------------------------------------------------------------------------------------------------------------------------------------------------------------------------------------------------------------------------------------------------------------------------------------------------|-------------------------------------------------------------------------------------------------------------------------------------------------------------------------------------------------------------------------------------------------------------------------------------------------------------------------------------------------------------------------------|
| <p>-Patient Measure of Organisational Safety (PMOS) - a 44 item questionnaire which asks patients at the hospital bedside about safety concerns and issues [5, 6].</p> <p>-The second is a reporting proforma for patients to provide detailed safety incidents or positive experiences [7].</p> <p>-The questionnaire items are theoretically-informed from a systems understanding of patient safety whereby experience of care is understood to arise from a complex interaction of factors that include staff team-working and access to resources as well as more traditionally-considered factors such as the physical environment</p> <p>- After patient feedback has been collected it is collated and presented in a feedback report to each ward. Ward staff are then asked to interpret this feedback to identify and target areas for improvement. Finally they are asked to implement agreed action plans and monitor progress in a cyclical manner.</p> <p>- Significant further detail about the cyclical activities is contained in the published protocol of the study [8] and the PRASE RCT results paper [9]</p> <div data-bbox="264 1029 761 1337" style="text-align: center;"> <pre> graph TD     A[Measurement of ward safety] --&gt; B[Feedback to wards]     B --&gt; C[Interpretation in Action Planning Meeting]     C --&gt; D[Implementation of actions &amp; monitoring]     D --&gt; A           </pre> </div> | <p>The design of PRASE recognises that ward staff need support to implement the intervention. An understanding of some of the facilitative processes required was derived from a feasibility study, prior to finalising its design [7]. Specific facilitative processes involved are:</p> <ul style="list-style-type: none"> <li>- <i>Independent collection of patient feedback by the research team</i> to enable not only objectivity but from a resource and logistics viewpoint as ward staff do not have the capacity to collect this data themselves</li> <li>- <i>Independent production of feedback reports by research team</i></li> <li>- <i>Negotiation with senior management</i> by the research team to embed the intervention into usual practice</li> <li>- <i>Ward staff training</i> in interpretation of data and role playing of optimum action planning to enable them to tackle systemic issues effectively</li> <li>- <i>Facilitation of the action planning meetings by a senior researcher</i> to i) convene the meeting ii) encourage ward staff to devise action plans which tackle systemic issues</li> <li>- <i>Motivation of staff and cross team learning and support</i> via the format of three pan Trust meeting involving representatives from the hospital senior management (Start Up meeting pre-trial, Mid-Point meeting half way through trial, Closing meeting after trial had concluded)</li> </ul> | <p>It was hypothesized that the intervention would lead to safety improvements in terms of both ward culture and ward performance (distal outcomes) alongside a development of a shared, collaborative understanding of the patient's perspective of safety (proximal outcomes). For more detail on this, consult the logic model developed from the feasibility work [7]</p> |

1  
2  
3  
4  
5  
6  
7  
8  
9  
10  
11  
12  
13  
14  
15  
16  
17  
18  
19  
20  
21  
22  
23  
24  
25  
26  
27  
28  
29  
30  
31  
32  
33  
34  
35  
36  
37  
38  
39  
40  
41  
42  
43  
44  
45  
46  
47

**Appendix 2: Trial design and results**

| <b>Trial design</b>                                                                                                                                                                                                                                                                                                                                                                                                                                                                                                                                                                                                                                                                                                                                                                                                                                                                                                                                                                                                                                                                                                                                                                                                                                                | <b>Trial results</b>                                                                                                                                                                                                                                                                                                                                                                                                                                                                                                                                   |
|--------------------------------------------------------------------------------------------------------------------------------------------------------------------------------------------------------------------------------------------------------------------------------------------------------------------------------------------------------------------------------------------------------------------------------------------------------------------------------------------------------------------------------------------------------------------------------------------------------------------------------------------------------------------------------------------------------------------------------------------------------------------------------------------------------------------------------------------------------------------------------------------------------------------------------------------------------------------------------------------------------------------------------------------------------------------------------------------------------------------------------------------------------------------------------------------------------------------------------------------------------------------|--------------------------------------------------------------------------------------------------------------------------------------------------------------------------------------------------------------------------------------------------------------------------------------------------------------------------------------------------------------------------------------------------------------------------------------------------------------------------------------------------------------------------------------------------------|
| <p>PRASE was trialled within a multi-centre, cluster, randomised controlled trial. The study was undertaken across 33 hospital wards in three NHS Trusts (five hospital sites). Seventeen wards were randomly assigned to an intervention group and 16 wards to a control group. Feedback was collected from approximately 25 patients per ward, collated and fed back to staff for interpretation and action planning. This whole process was then repeated in a second cycle so staff were able to see changes to feedback over time.</p> <p>The study was powered to detect a small to medium difference (0.3) between the intervention and control groups with respect to a Primary Outcome which was the Patient Safety Thermometer (PST). PST data is routinely collected from every ward in England on a monthly basis and reports on harm free care associated with: i) pressure ulcers, ii) venous thromboembolisms, iii) catheter associated urinary tract infections and iv) falls. PMOS was chosen as a secondary outcome. This was obtained twice from the intervention wards within their intervention cycles. It was also taken at the same three time points in the control wards.</p> <p>For further detail, consult Sheard et al (2014) [8].</p> | <p>No significant effect of the intervention between the allocation groups was found for either of the primary outcomes PST (p=0.98) or PMOS (p=0.09) at 6 or 12 months, nor other secondary outcomes. However, a post hoc analysis on new harms (contained in the PST) found a non-significant increase in harm free care of 1.60 for intervention wards over control wards. All wards were retained throughout the trial. Patient response rate for completing the PMOS tool was 86%.</p> <p>For further detail, consult Lawton et al (2017) [9]</p> |

### Appendix 3 - Holly ward pen portrait

Facilitator's field notes

Phase one – The action planning meeting (APM) consisted of five staff who had all read the report before the meeting. These were: a sister, a staff nurse, a ward clerk and two HCAs. The ward manager had attended the Trust wide PRASE start-up session but was not able to come to the APM so the facilitator had to give an extensive introduction about the study to the group. The ward clerk did not understand what the term 'patient safety' meant so the facilitator had to go back to basics to make sure that everyone in the room knew what PRASE was about.

Taped APM discussion

Facilitator's field notes

The APM was difficult to convene as discussion tended to jump around. The ward clerk was very vocal and the rest of the group seemed to defer to her opinion. Overall, this was a positive meeting and the group seemed engaged with the study by the end of it. The main action plan was to explore whether better systems/communication could be put in place between theatre and the ward to try to reduce the amount of patients who are starved all day only to have their operation cancelled at the last moment. This action plan was challenging in its approach as it sought to redesign well established systems.

Follow up phone interviews

The phone interview found that the action plan about changing the system of communication between theatre and ward was not realised at all because the theatre matron had not responded to the sister about this despite the sister requesting to meet about the issue several times.

Follow up phone interviews

Phase two – The sister attended the Trust wide PRASE midpoint meeting and reported that she found it useful especially to see that many of the problems which patients were reporting on her ward were the same across other wards in the Trust.

Taped APM discussion

Facilitator's field notes

The sister convened another APM although this was smaller in size than the APM in phase one. The failed action plan from phase one about improving communication between theatre and the ward was discussed again. There is acknowledgement that there are not enough qualified staff at night who are able to put a central line in and this is having a knock on effect on the ward. An action plan was developed to talk to the central line team about this problem of lack of qualified staff.

1  
2  
3  
4  
5  
6  
7  
8  
9  
10  
11  
12  
13  
14  
15  
16  
17  
18  
19  
20  
21  
22  
23  
24  
25  
26  
27  
28  
29  
30  
31  
32  
33  
34  
35  
36  
37  
38  
39  
40  
41  
42  
43  
44  
45  
46  
47  
48  
49  
50  
51  
52  
53  
54  
55  
56  
57  
58  
59  
60

Follow up phone interviews

The follow up phone interview for this phase found that implementation had floundered. The APG were far reaching in what they want to happen but were dependent on other departments for buy in and the interest from personnel in other departments was just not there. The sister reported via the phone interview that the Trust are not interested in training more people to be qualified in putting central lines in and the theatre matron is still not interested in rectifying the issue of patients being starved on the ward for days at a time. This ward seemed to be less involved in other safety, quality and experience initiatives than other wards were (even at the same Trust).

Facilitator's field notes

The sister came in on her day off to attend the Trust wide Closing meeting. She was firmly committed to the study throughout and indeed to improving patient safety.

**Engagement profile:** This ward team did everything that was asked of them and they were highly engaged as a group with the purpose of PRASE. They made some far reaching action plans which sought to challenge underlying structural barriers but made little progress with these when they tried to implement them as other departments on which they depended for buy in were not interested. **Engaged throughout despite organisational setbacks.**

Appendix 4 – Diagram of engagement typologies

1  
2  
3  
4  
5  
6  
7  
8  
9  
10  
11  
12  
13  
14  
15  
16  
17  
18  
19  
20  
21  
22  
23  
24  
25  
26  
27  
28  
29  
30  
31  
32  
33  
34  
35  
36  
37  
38  
39  
40  
41  
42  
43  
44  
45  
46  
47

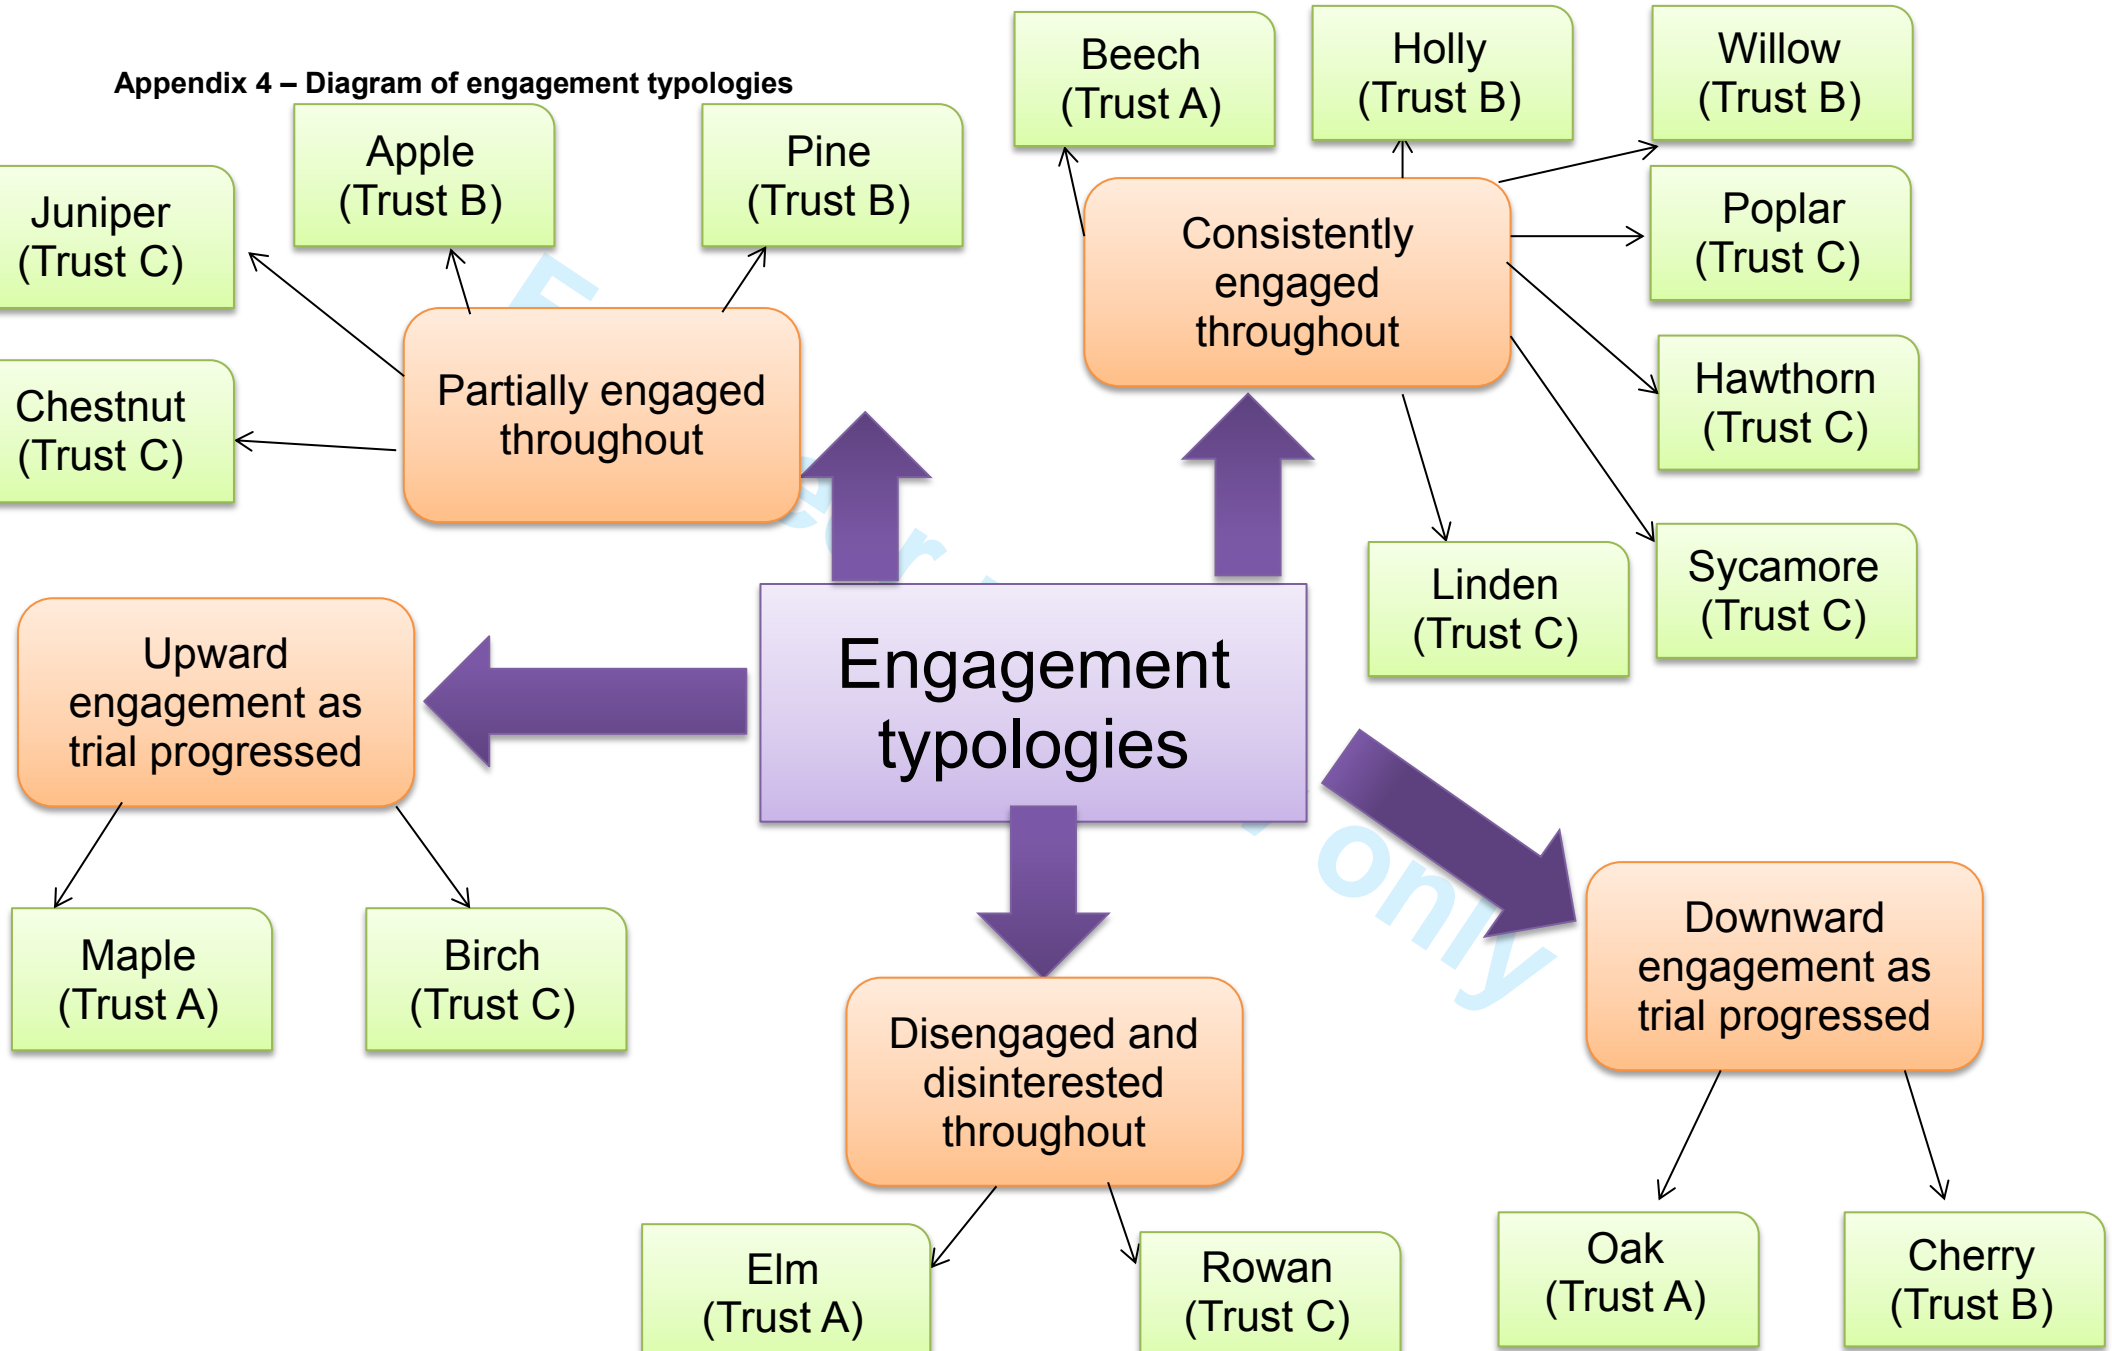



1  
2  
3 Exploring how ward staff engage with the implementation of a patient  
4 safety intervention: A qualitative process evaluation  
5  
6

7 Laura Sheard  
8 laura.sheard@bthft.nhs.uk  
9 Bradford Institute for Health Research, United Kingdom  
10

11 Claire Marsh  
12 claire.marsh@bthft.nhs.uk  
13 Bradford Institute for Health Research, United Kingdom  
14

15 Jane O'Hara  
16 jane.o'hara@bthft.nhs.uk  
17 Bradford Institute for Health Research & University of Leeds, United Kingdom  
18

19 Gerry Armitage  
20 g.r.armitage@brad.ac.uk  
21 University of Bradford, United Kingdom  
22

23 John Wright  
24 john.wright@bthft.nhs.uk  
25 Bradford Institute for Health Research, United Kingdom  
26

27 Rebecca Lawton  
28 r.j.lawton@leeds.ac.uk  
29 Bradford Institute for Health Research & University of Leeds, United Kingdom  
30

31 Corresponding author:  
32 Laura Sheard  
33 Bradford Institute for Health Research  
34 Bradford Teaching Hospitals  
35 Bradford Royal Infirmary  
36 Duckworth Lane  
37 Bradford  
38 BD9 6RJ  
39 United Kingdom  
40  
41  
42  
43  
44  
45  
46  
47  
48  
49  
50  
51  
52  
53  
54  
55  
56  
57  
58  
59  
60

## ABSTRACT

*Objectives* – A patient safety intervention was tested in a 33 ward randomised controlled trial. No statistically significant difference between intervention and control wards was found. We conducted a process evaluation of the trial and our aim in this paper is to understand staff engagement across the 17 intervention wards.

*Design* – Large qualitative process evaluation of the implementation of a patient safety intervention.

*Setting and participants* – NHS staff based on 17 acute hospital wards located at five hospital sites in the North of England.

*Data* – We concentrate on three sources here: i) analysis of taped discussion between ward staff during action planning meetings ii) facilitators' field notes iii) follow up telephone interviews with staff focussing on whether action plans had been achieved. The analysis involved the use of pen portraits and adaptive theory.

*Findings* – First, there were palpable differences in the ways that the 17 ward teams engaged with the key components of the intervention. Five main engagement typologies were evident across the life course of the study: consistent, partial, increasing, decreasing and disinterested. Second, the intensity of support for the intervention at the level of the organisation does not predict the strength of engagement at the level of the individual ward team. Third, the standardisation of facilitative processes provided by the research team does not ensure that implementation standardisation of the intervention occurs by ward staff.

*Conclusions* - A dilution of the intervention occurred during the trial because wards engaged with PRASE in divergent ways, despite the standardisation of key components. Facilitative processes were not sufficiently adequate to enable intervention wards to successfully engage with PRASE components.

## STRENGTHS AND LIMITATIONS OF THIS STUDY

- We devised a process evaluation that had several robust qualitative data collection methods which complemented each other, in order to build a comprehensive and holistic picture of how ward staff implemented the intervention
- Our approach allowed us to reveal how the differing ways in which staff teams engage with the intervention may impact on patient safety changes at a ward level
- Our novel analytic approach utilised pen portrait methodology in a differing way to how it has previously been used in health services research, in order to document the journey of 17 wards interacting with an intervention over an 18 month period
- We have little understanding of whether the implementation of PRASE may have gained traction and fuelled subsequent ward based change once the research team left the field
- The qualitative methods we chose were designed to capture a broad understanding of the contexts in which the intervention was implemented but had we known a priori that engagement was such a significant factor, we may have designed the process evaluation to specifically explore its influence.

## BACKGROUND

Measurement of patient safety has traditionally relied on information from staff such as incident reports or recording information about harms such as falls or pressure sores. Recently, patients have been emphasised as being an important detector for patient safety and likened to the 'smoke detectors' of safety [1]. There is an increasing recognition that hospitals need to find better ways to capture and respond to the concerns of patients regarding the quality and safety of their care [2-4]. However, patients are rarely asked about structural or procedural aspects of care which may contribute towards failures in patient safety. The Yorkshire Quality and Safety group have developed a patient safety intervention called Patient Reporting and Action for a Safe Environment (PRASE). This intervention firstly elicits patient perceptions on how a ward is performing on a series of issues which are known to contribute towards patient safety incidents and secondly assists staff to interpret patient feedback to aid service improvements. This paper provides an account of a qualitative process evaluation of a randomised controlled trial (RCT) where PRASE was tested. PRASE was designed [5, 6], tested for feasibility [7] and trialled [8, 9] between 2010 and 2015. This period has been charted as an era of paradigm shift for patient safety research when the dominant 'measure and manage' orthodoxy has been enriched by approaches sensitive to setting and socio-cultural/ political influences [10]. It became essential for a process evaluation to capture the nuances involved in the PRASE implementation.

Process evaluations have been used to explain sub-optimum outcome effects, specifically whether there was a 'fault' with the intervention itself, its key components or with delivery [11]. Latterly, they are often not only concerned with adherence to original plans, but also with broader issues such as unintended consequences or the strengths and weaknesses of the intervention itself [12]. Some process evaluations have been able to identify a precise 'pinch point' or problem with an essential component of the intervention that caused it to fail. In a UK trial of peer led HIV prevention for gay men in London, no effect was shown. A qualitative process evaluation [13] revealed that the essential component of 'peer educator' had not played out as intended during the course of the trial due to recruitment problems and the inability of peer educators to confidently communicate harm reduction messages to intended targets. Other process evaluations have been able to point to more general cultural or structural reasons why an intervention may not have succeeded. Dixon-Woods et al [14] evaluated why a U.S. developed patient safety intervention - regarding decreasing central line infections in intensive care units - struggled with implementation after the intervention was transferred to a U.K. setting. A post-hoc qualitative evaluation revealed multiple reasons why, largely the result of cultural differences between the U.S and U.K. settings. It is clear from these examples that process evaluations can support the largely 'experimental' aim of RCTs by identifying specific 'pinch points' within an intervention itself or within the context that will help to explain success or failure.

The components of the intervention have been reported in detail elsewhere [8], and the results of the randomised controlled trial which demonstrated no statistically significant effect between the intervention and control wards [9]. A feasibility study was undertaken prior to commencement of the full RCT and details of our logic model and moderating factors are reported in the feasibility write up [7]. Here, we provide a synopsis of the intervention and results of the trial for the reader to be able to view our process evaluation in context. Appendix 1 provides a detailed summary of the cyclical activities and facilitative processes of the intervention that were trialled, alongside anticipated outcomes. Appendix 2 describes the trial design and results. Briefly, this was a cyclical study with two phases of: i) collecting patient feedback about safety from patients at the bedside ii) collation of this data and ward staff interpreting it iii) ward staff action planning to improve patient safety iv) plans then being implemented and monitored.

## METHODS

We conducted a robust process evaluation involving differing qualitative and quantitative methods [8] which gathered comprehensive data about all 17 intervention wards. We drew upon a published framework [12] for designing process evaluations of cluster randomised controlled trials. The main a priori research question was: 'where does the intervention work, how and why?' [8]. In this paper, we have chosen to focus on the 'how?' and 'why?' and present a detailed picture of how staff engaged with the intervention. We now apply our original research question to understand how and why the intervention did *not* work, given the intervention did not have a significant effect on outcomes. Six mixed methods were used in the wider process evaluation but due to the extent and depth of the data collected, we focused intensively on three qualitative methods for the purpose of this paper. The methods described below are those most pertinent to exploring how staff engaged with the intervention in the ways they did, and why. Data was collected between August 2013 to November 2014. NHS ethical approval was granted in March 2013.

### *1. In depth analysis of taped discussion between ward staff*

Action planning meetings (APMs) were digitally recorded for all 17 wards at both phases. At phase two, one ward did not meet so we considered the recordings of 33 APMs. These ranged in length from 27 to 80 minutes (average 43 minutes). Our examination focused on which areas of patient feedback staff chose to make action plans on and which areas they chose not to. We wrote detailed notes whilst listening to the voice file. We structured our notes under the headings: i) Issues seen as important where actions were made (and why) ii) Issues seen as important where no actions were made (and why not) iii) Issues dismissed and reasons for this iv) Comments made by staff about PRASE process/ study/ team v) Comments made by staff about the ward or hospital context.

### *2. Facilitator's field notes*

These notes were written shortly after the APM had finished and captured: i) implicit dynamics between staff, such as body language, tone of voice and other non-verbal cues ii) environmental factors, such as descriptions of the physical space where the meeting was held iii) facilitator's overall impressions. Field notes were brief and gave a 'snapshot' of the meeting. There were three facilitators across the 17 intervention wards and each facilitator worked with the same wards across both phases of the study, to ensure continuity. Field notes were also taken at key meetings and events held with Trust senior management personnel (particularly during set up and roll out of the study). These notes assisted in providing the research team with tacit knowledge of the culture of the site in which the intervention was being implemented.

### *3. Follow-up telephone interviews conducted with the APM lead*

The purpose of these short, structured phone interviews was to ascertain whether action plans had been successfully implemented or not and why. They were conducted around six months after the APM, with the 'PRASE lead' for each ward. Each ward was responsible for nominating a named member of ward staff - who was part of the action planning meeting - to be the PRASE lead. This could be any member of the team but was more often than not the person who volunteered for the role was a senior nurse. A structured interview guide was used. Researchers had a proforma in front of them which contained details about each action plan per ward and they asked the PRASE lead whether each action plan had been implemented – yes, no or partially. Open questioning then continued to understand the factors surrounding this. Five additional questions were asked which focussed on the PRASE lead's opinion of the facilitative processes embedded in the study.

For the purpose of this paper, we wanted to understand **qualitatively** how wards had engaged (or not) with the PRASE intervention. Implementation fidelity (which captures adherence to specific intervention components) is reported quantitatively elsewhere [9]. Engagement of staff with an intervention can be considered as closely aligned but different

1  
2  
3 from this, referring more to the differing approaches and attitudes that staff take to the task in  
4 hand (implementation of different components of the intervention). This is different to  
5 whether they have simply delivered the task or not. We decided not to adhere to a  
6 numerical/scale definition of 'engagement' whereby differing wards attained a binary  
7 definition of either 'engaged' or 'disengaged' with the intervention. Instead, we undertook a  
8 nuanced analysis of staff approaches and attitudes to: conducting an action planning  
9 meeting, creating quality action plans and implementation of these action plans. We  
10 explored 'engagement' as a concept that we define as the 'depth' and 'nature' of ward teams'  
11 approaches and attitudes to the intervention.  
12

13 Informed by this understanding of engagement, a synthesis of the above data sources has  
14 provided us with a rich account of the '**engagement trajectory**' of each ward and this was  
15 realised by creating a pen portrait of engagement. Pen portraits have been used previously  
16 in applied health research in fields as diverse as: end of life care [15], vulnerable old people  
17 being enabled to keep warm in their homes [16] and sleeping practices amongst homeless  
18 drug users [17]. Previously, they have provided a narrative account of a 'typical' participant in  
19 qualitative studies or as an analytic aide memoir. We used them in a slightly different manner  
20 to document the 'journey' of the wards throughout the trial from the perspective of the  
21 researcher who had worked closely with these wards for over 18 months. There is a lack of  
22 methodological literature pertaining to the construction of a pen portrait and this has been  
23 left to the discretion of individual research teams. We created a basic structure for the pen  
24 portraits which centred on the writing of a linear, longitudinal account of how each ward had  
25 engaged with relevant key components of the intervention and the contextual factors which  
26 influenced this, ensuring that all three data sources were drawn upon. We did not use an  
27 existing theory or framework on which to extract the data for the pen portraits as we wanted  
28 the emergent findings to arise inductively from the data set. As staff engagement was our  
29 focus, we included as much material on this as possible (along with explanatory factors and  
30 necessary description). We excluded minutiae which did not add to the 'big picture' of the  
31 ward team's engagement to maintain a focussed pen portrait. The pen portrait for Holly ward  
32 is shown in Appendix 3 with the prose annotated as an illustration of how portraits were  
33 constructed from the three data sources outlined above.  
34

35 Researchers took into account all the information contained within the pen portrait and  
36 attributed an overall 'engagement trajectory' label to each ward. Author A wrote all pen  
37 portraits for Trusts A and B and Author B for Trust C. We categorised the 17 different ward  
38 engagement trajectories into five main 'engagement typologies', which emerged from an  
39 analytical session centring mainly on consensus discussion between Author A and Author B.  
40 We report three overarching themes in this paper, which are described in detail in the  
41 Findings section which follows. The above categorisation of engagement typologies led to  
42 the content of the first theme. After we were confident of the findings of this first theme, we  
43 then used the differences in engagement detailed in this theme to progress to themes two  
44 and three. To achieve this, we looked between and across the engagement trajectories of all  
45 17 wards in order to understand how engagement with the intervention related to  
46 components of local implementation. We returned to the detail of the pen portraits to  
47 understand commonality and difference and from this we developed the coding framework  
48 for themes two and three. We then checked our assumptions by testing the data in the pen  
49 portraits against our initial coding framework. After minor adaptations, we then coded the data  
50 in all 17 pen portraits. Overall, we used techniques derived from 'adaptive theory' [18] which  
51 allows for high level frameworks and conceptualisations to emerge from data rather than  
52 descriptive themes. Adaptive theory proposes a continual engagement between the arising  
53 empirical data and arising theoretical interpretations of the research, working in a continuous  
54 cycle with each cycle generating new explorations.  
55  
56  
57  
58  
59  
60

## FINDINGS

We now set out to understand the ways in which the 17 intervention wards engaged with the intervention. We are interested in how a multiplicity of engagement styles could have made an already complex intervention become hyper complicated in its implementation phase. This 'hyper complexity' may have served to dilute key elements of the intervention. By 'dilution' we mean 'non-standardisation' of the intervention group, thereby reducing the potential for this to be meaningfully compared with a control group. We explore three high level themes, which emerged from the data. Firstly, we will describe how there were palpable differences in the ways that ward teams engaged with the intervention. Next, we will look at how support for the intervention at the level of the Trust does not indicate ward level support. Lastly, we will demonstrate that standardisation of facilitative processes by the research team does not ensure this filters down to implementation standardisation by ward staff. All quotation extracts are taken from pen portrait notes and all ward names have been ascribed a pseudonym.

### *1. The same intervention can be interacted with in highly divergent ways*

We were able to distinguish the intervention wards into five main 'engagement typologies' (Appendix 4). They are:

- Consistently engaged throughout (7 wards)
- Partially engaged throughout (4 wards)
- Increasing engagement as trial progressed (2 wards)
- Decreasing engagement as trial progressed (2 wards)
- Disengaged and disinterested throughout (2 wards)

Consistently engaged – This represents the largest category of how wards chose to participate in the trial with 7 out of the 17 residing here. These wards were fully signed up to the ethos of listening to and acting on patient feedback. They took part in a high proportion of the key components of the cyclical activities and made quality action plans which were largely implemented in both phases. A quality action plan can be defined as one which seeks to address issues identified in the patient data and was realistic, relatively timely and more than likely to be achieved. Motivation to take part in the research was high and improving patient safety was even higher.

Partially engaged – These four wards generally did everything asked of them by the research team and largely participated in intervention components but were sometimes lacklustre in their motivation towards improving patient safety. At times, it felt like action planning was just 'going through the motions'. The ability of staff to implement action plans was mixed although this was sometimes due to external factors rather than inertia on the part of the ward staff themselves.

Increasing engagement – These two wards began their involvement with the trial in an ambivalent and – in the case of Maple ward – even hostile manner. However, as the study progressed and the ward staff began to understand what the research team were trying to achieve, engagement with the study solidified. The similarity between these two wards (despite being at different Trusts) is that the turning point for their engagement was attendance at the peer centred Mid-Point Meeting. This is reflected in Maple ward's complete U-turn with implementation of quality action plans at phase two as compared with partial implementation of weak action plans at phase one.

Decreasing engagement – Conversely, another two wards engaged with the study relatively well at the beginning but, over time, slipped in their level of interest and involvement. Cherry ward is the only ward across all 17 who did not meet in an APM in phase two. The follow up telephone interview revealed that the ward manager for Cherry did not believe the study was a priority. Oak ward had ambitious plans for their phase one action planning but had become

1  
2  
3 dejected by the amount of time their plan was taking to come into effect. Subsequently, they  
4 declined to make an action plan in the phase two APM and appeared disinterested in the  
5 study.  
6

7 Disengaged and disinterested – Although these two wards met in APMs for both phases of  
8 the trial, they were not interested in using the PRASE data to improve patient safety and  
9 viewed the study as a burden. However, the reasons for this response differed. Rowan were  
10 a low performing ward whose ward manager preferred to concentrate on the other initiatives  
11 rather than our research study. Elm ward were outwardly hostile to the ethos of the study,  
12 critical of the comments their patients had made to researchers and defensive of staff  
13 members. Despite agreeing to hold an APM, they consistently refused to make action plans.  
14

15 Through an examination of these differing engagement trajectories, we can unpick where  
16 parts of the intervention may have led to divergent strategies for local implementation of the  
17 intervention on a ward-by-ward basis. These findings from 'on the ground' implementation by  
18 ward teams directly contradict some of the core assumptions held by the research team at  
19 the outset of intervention development - namely, that by providing facilitative processes,  
20 wards would be able to implement in a uniform manner. It is this aspect of a chasm between  
21 implementation expectations and reality which we now turn our attention to.  
22

## 23 *2. Trust-level support for an intervention does not predict the strength of ward-level* 24 *engagement*

25 A key assumption was that strong corporate, managerial-level support by the three  
26 participating Trusts would facilitate high-level engagement by wards. However an  
27 examination of the differing types of engagement trajectories, shown in Figure 1, throw doubt  
28 on this assumption and we can find little consistency in engagement style between the  
29 wards at the same Trust. For instance, Trust A is a small district general hospital in a semi-  
30 rural, affluent area. This Trust prides itself on being a forward thinking, cohesive workplace  
31 and senior management support for this intervention was exceptionally strong. However,  
32 when reduced down to the level of the ward, we can see that the four intervention wards at  
33 Trust A are represented across four distinct engagement trajectories (Consistent = Beech,  
34 Increasing = Maple, Decreasing = Oak, Disengaged = Elm). Engagement trajectories for  
35 each of the other two Trusts also differed considerably by ward. The implication here is that  
36 corporate culture - and receptivity to patient feedback at the level of the organisation - is not  
37 a simple predictor of engagement at ward level.  
38

39 Unpicking these differences further, we find that despite a uniform message about the  
40 importance of a multi-disciplinary approach to the study, wards seem to have interpreted this  
41 differently. Oak ward convened a strong first multi-disciplinary APG with representatives from  
42 nursing, allied health professionals and support staff. In contrast, on some wards PRASE  
43 remained led and implemented by just one or two nursing staff. For example, Maple's first  
44 APG consisted of just the ward manager and pen portrait notes illustrate why:  
45

46  
47 *A very tense meeting held with just the ward manager who appeared overtly stressed*  
48 *and about to implode. It was clear at this first APM that the ward manager had not*  
49 *understood the purpose of the study and became upset by some of the negative*  
50 *comments which her patients had made in the report. It was a difficult APM to*  
51 *convene as the ward manager thought she had to solve everything by herself and*  
52 *this was partially reinforced by the fact that she had not invited any of her staff to the*  
53 *APM (Maple, Trust A)*  
54

55 The research team never envisaged that the intervention would be taken on by just one or  
56 two members of ward staff and this was actively discouraged throughout but still persisted in  
57 five wards at phase one and six wards at phase two, across the 17 intervention wards. It is  
58 difficult to suggest a clear reason why this happened but it was often related to:  
59  
60



- Front line issues, such as no staff available to be released from direct patient care to attend APG
- A minority of ward managers viewing the study as yet another patient safety initiative that they just needed to 'get on with'
- A misunderstanding of the multi-disciplinary nature of the intervention.

Of most interest is the severe paucity of medical staff involved in the intervention with only four wards (all at Trust C) involving a medic. This was unforeseen at the outset and may have contributed to action plans that were narrower in scope than those generated by a strong MDT. Even those wards who managed to convene a strong multi-disciplinary APG in phase one were often not able to sustain this level of input going into phase two. Towards the end of the study, it was disappointing to see that PRASE had unwittingly become badged as a 'nursing initiative'. Medical and allied health professional input declined over time and the workload was disproportionately being shouldered by individual Ward Managers (managerial nurses) who were for the most part already overloaded in their daily clinical roles.

Furthermore, an assumption was that a tight, coherent and most importantly *consistent* group of staff would engage with the intervention throughout the 14 months of staff involvement. In reality, staff movement around the NHS estate was high. This led to difficulties regarding ownership of action planning with some staff reluctant to proceed with action plans devised by their predecessors and others not believing it was worth the effort to become involved in the study if they were moving on shortly. A few ward teams changed their personnel completely between phase one and two of the study due to managerial reorganisation:

*A massive change in staffing took place around the latter part of Phase one with a new Ward Manager and 80-85% change in ward staff. The second phone interview revealed that other ward initiatives were taking place...the whole PRASE process was never wholly embraced because of intense ward improvement work, and staff flux, taking place at the same time (Chestnut ward, Trust C)*

It was never anticipated that such wholesale change would take place at the level of the individual ward teams within the lifetime of the trial and the intervention was unprepared for this. There was little formal capacity to continually re-introduce PRASE to new ward staff, despite researchers having to perform this ad hoc and unexpected role. Critically, it points to ownership of the intervention on the ground as a key factor in success. The engagement with the intervention becomes weak if it is passed around large numbers of different staff or if staff groups change on a dramatic scale.

### *3. Standardisation of facilitative processes by the research team does not necessarily ensure implementation standardisation by ward staff*

A key intention of the facilitative processes was to ensure standardisation of implementation by ward staff. The process evaluation found that, in reality, these uniform training and facilitative processes resulted in little standardisation of approach to action planning regarding a) the issues which staff chose to focus on or b) whether the action plans were successfully implemented (or not). Our pen portraits point to three main issues that appear to underpin why:

- Implementation of action plans were often related to buy in and collegiate working with other departments, some of whom were not willing to spend time, resource and effort on an issue which was not their own
- Existing pan-Trust safety and quality campaigns were prioritised over and above PRASE, to differing degrees which variably helped or hindered PRASE intentions
- Success was often the result of a complex interplay between the personal will of the staff involved in the APG and whether the study fitted into current ward priorities

1  
2  
3  
4 The following pen portrait excerpt from Apple ward exemplifies the first identified issue  
5 regarding buy in from other departments. This ward had several negative comments from  
6 patients that pain relief was not being given in a timely manner. To address this, the APG  
7 decided they needed assistance from pharmacy but this was not forthcoming and APG  
8 members were disappointed. This led to the contradictory position in phase two of  
9 engagement still being very present but the act of action planning itself becoming tokenistic:  
10

11 *This ward stayed engaged with the project the entire way through despite setbacks with*  
12 *their earliest action plan. The ward manager in particular clearly understood the purpose*  
13 *of the study and was sympathetic to receiving patient feedback. However, inertia may*  
14 *have crept in as their 'outside the box' thinking in phase one did not get any buy in from*  
15 *the pharmacy department. Action planning in phase two then became perfunctory even*  
16 *though engagement was still high (Apple, Trust B)*  
17

18 The second issue of other safety campaigns being prioritised above this study relates to the  
19 capacity with which ward staff have within their normal clinical roles to be able to undertake  
20 improvement work. In several of the pen portraits, PRASE was described as “just one of  
21 many improvement initiatives which this ward are involved in”. Wards were under pressure  
22 to take part in hospital wide initiatives that executive teams had deemed to be of most  
23 importance. Whilst there was senior support for PRASE, it was not always significant in  
24 comparison to other initiatives. In some cases, the existence of other high profile campaigns  
25 supported staff in achieving their PRASE action plans. Trust C launched a well-received  
26 “Hello my name is...” patient experience campaign tying into national acknowledgement of  
27 the need for staff to introduce themselves and communicate better with patients at the  
28 bedside. On the wards where PRASE feedback had also drawn attention to this need, staff  
29 were supported to respond (through badges, awareness training and senior-support) to do  
30 so.  
31

32 However, the flip-side of attention on more high-profile campaigns meant that – for some  
33 wards – PRASE became sidelined. Associated with this was a feeling of patient safety and  
34 quality ‘fatigue’ with the amount of initiatives in this area felt too numerous and therefore  
35 burdensome on staff time:  
36

37 *I got the sense that the ward manager saw PRASE as just another audit which she*  
38 *needed to go through the motions of...At one point during phase two, she admitted*  
39 *that in phase one she did not see the value in the study as she thought it just*  
40 *replicated other patient experience measures her ward is involved in. However, now*  
41 *she appreciates how it is different from the other measures...Working out where*  
42 *PRASE fitted in with other initiatives seemed to be a big issue for this ward manager*  
43 *(Pine Ward, Trust B)*  
44

45 One strong finding to emerge was the use of PRASE data to reinforce safety or quality  
46 issues which the ward staff knew about tacitly but did not have robust data about in order to  
47 report to senior management. This finding emerged as a divisive issue. Some wards were  
48 pleased that the PRASE study reinforced staff opinion about the ward or validated on a  
49 larger scale the results of local audits. However, a minority of staff became irritated and  
50 instead viewed it as duplication.  
51  
52  
53  
54  
55  
56  
57  
58  
59  
60

## DISCUSSION

As introduced at the outset, some process evaluations are able to reveal specific 'pinch points' within the intervention itself [13], or within the overall setting in which it was applied [14], which help to explain why no effect was seen. The Consolidated Framework for Advancing Implementation Research advocates the 'inner setting' of an organisation as being influential in whether or not implementation can be achieved, where attention must be paid to the domains of: structural characteristics, networks and communications, culture, implementation climate [19]. Our process evaluation found that this inner setting was so varied between wards within the intervention group that this led to a general 'dilution' of intervention implementation. We found striking differences between wards across all the above domains of 'inner setting' – stability of ward teams, quality of relationships between different wards, basic assumptions towards receiving patient feedback and a learning climate (or lack of one). Significantly, we saw changes to the 'inner setting' constructs over time. The in-depth analysis of what happened within the intervention group generates useful insights for implementation of, and staff engagement with, patient safety initiatives to which we will now turn our attention.

The improvement of patient safety is already acknowledged as a cultural issue and the importance of factors such as teamwork, leadership and organisational processes operating at and between multiple levels [20]. Navigating this territory - particularly the link between 'sharp end' ward safety initiatives and 'blunt end' corporate planning - has been documented as a necessary challenge. Initiatives which do not pay adequate attention in this regard are at best destined to fail, and at worst may over-burden already de-motivated staff [21]. The facilitative processes incorporated into PRASE were designed to help address this challenge. These processes arose from the findings of feasibility testing of the intervention [7] where our research team found that, for example, access to senior management at regular intervals and assistance in interpreting patient feedback were important factors which may support action planning. The assumption was that by providing these processes, staff would be better placed to successfully navigate complex organisational territory. It was anticipated this would allow some uniformity amongst the intervention group. In actuality, the facilitative processes were not adequate to ensure any such uniformity.

Dixon-Woods et al (2011) [22] developed a post theorisation of why impressive results were seen in the original Michigan intervention - to decrease central line infections - in the U.S. Six reasons are proposed as to why the program worked. Of particular applicability is the 'creation of a networked community' where ward teams came together to build rapport and support for each other whilst identifying and resolving common barriers. Although part of the facilitative processes within the PRASE intervention aimed to attend to this need, it is likely that the community of wards involved in the study never reached a critical threshold in becoming an organic community who regularly reached out to each other. Further, specific leaders were targeted in the Michigan programme including hospital executives and clinical team leaders. This involvement of leaders at differing levels of the organisation is theorised as being integral to the success of the programme. Conversely, we found that involving senior management and matrons prior to the start of the study and then throughout its entirety had minimal effect on strengthening engagement with the intervention on the ground by frontline ward staff. Questions regarding the ability of senior management to support consistency of intervention adoption throughout an organisation, and the processes required to enable this further, were raised by our study and certainly warrant further exploration.

In this study, the relationships between different parts and levels of the organisation from senior management to ward teams to individuals were vital in achieving success. When these levels align well, as they appeared to do in one Trust - with respect to a culture shift around introducing and communicating to patients via an external patient experience campaign - it appears that much can be achieved. When they do not – e.g. Apple ward who did not get buy in from the pharmacy department - staff at the ward level can become

1  
2  
3 frustrated and demotivated. We therefore question the capacity of an externally designed  
4 intervention, even one with significant resources and facilitative processes, to provide the  
5 mechanisms to be continually adaptive to the organisational alignment between the sharp  
6 and blunt end at differing institutions. The challenges revealed here are about deeper  
7 organisational culture, systems and processes that need longer-term development.  
8  
9

10 Our findings support the growing understanding that emphasis in patient safety research  
11 must continue to shift from the measure and manage orthodoxy of data collection to  
12 interpretation and process [10]. In this research, the collection of patient feedback was the  
13 least problematic element. The complexity of what staff are being asked to do in  
14 interventions like PRASE (navigating multi-layered organisational systems to implement  
15 improvements) requires much more consideration. In the broader but related policy area of  
16 patient experience, the overt emphasis and huge resource allocated to collecting patient  
17 experience data has not been matched by efforts to utilise and evaluate the impact of  
18 feedback on service improvement [23]. There is increasing recognition that using data  
19 sources to change practice demands creativity and skills from staff; hence the tendency to  
20 present staff with data and expect change to happen as a result [24]. Our intervention  
21 considered these issues a priori and hence facilitative processes were built into the trial yet  
22 they were not sufficiently robust enough to ensure a standardised implementation across  
23 intervention wards.  
24

25 One interpretation of PRASE could be that it 'failed' due to showing no effect between the  
26 intervention and control wards. We believe this a simplistic view which does not take into  
27 account the wealth of positive benefits which patients and staff gained. Firstly, it showed that  
28 patients are able to give feedback about the safety and quality of care and that they want to  
29 do this en masse (our consent rate was 85% of those patients approached by researchers  
30 and the number of patients recruited to the study was 2400 across five different hospital  
31 sites). Secondly, the process evaluation showed that most staff *do* believe the patient voice  
32 is important and there is an imperative to listen to, and act on, this voice. Thirdly, despite  
33 local struggles, most staff do want to action plan to improve their patients' care. The majority  
34 of the wards were receptive to receiving patient feedback – it is when they tried to move  
35 improvement work forward that problems arose [25]. An additional gain which some staff  
36 identified was the ability of the patient feedback to allow staff to understand not only the  
37 patient perspective but also their priorities and to visualise the ward environment and  
38 systems 'through the eyes of the patient'.  
39

#### 40 *Limitations*

41 We cannot know whether positive attitudes towards patient involvement in patient safety  
42 have continued on the intervention wards after the trial was completed. Improvements that  
43 staff were working towards may have gained impetus since the research team left. Equally,  
44 involvement in the trial may have kick-started ideas which, although did not come to fruition  
45 within its life span, may now be fuelling ward level action. Conversely, staff may have felt  
46 disempowered to enact improvement to the ward environment if their PRASE action plans  
47 had floundered. We have no format for measuring this 'after effect' – either positive or  
48 negative – and little scope for knowing at what time point the evidence of a more long lasting  
49 effect may be captured.  
50

51 Our pen portrait methodology is a culmination of all sources of qualitative data collected and  
52 has its inherent weaknesses. This methodology is still in its relative infancy in relation to the  
53 way in which we have utilised it here. We were careful to draw equally on all sources of data  
54 in order to build a comprehensive narrative of the engagement trajectory of each ward.  
55 However, a differing analysis paying attention to fewer sources or an unequal weighing of  
56 sources may have pulled the narrative account in a slightly different direction. Further, it was  
57 difficult to categorise some wards firmly into their allocated engagement typology and  
58  
59  
60

1  
2  
3 arguably some could fit into several. Finally, process evaluation methods were developed a  
4 priori to the start of the trial so the design was very open. We devised a loose structure to  
5 capture qualitative intelligence on key trial processes. If prior knowledge existed that  
6 diversity of engagement within the intervention wards was to be so significant, it may have  
7 been possible to target a particular process evaluation framework for analysing outcomes in  
8 relation to this diversity, such as the 'diffusion of innovation model' [26]. It is a possibility that  
9 utilisation of differing methods may have provided other answers as to where different  
10 elements of the intervention worked, for whom and why.

## 11 12 **CONCLUSION**

13 Whereas previous process evaluations point towards specific pinch points or broader cultural  
14 issues to understand why an intervention showed no effect, this study points to an overall  
15 'dilution effect' of the intervention. This was largely due to wards engaging with the  
16 intervention in highly divergent manners despite the standardisation of key components by  
17 the research team. The facilitative processes were inadequate to ensure full engagement  
18 across all wards in the study. A disconnect existed between senior management support for  
19 the study and how ward staff on the ground engaged with it more locally. The above findings  
20 assist in explaining why the trial saw no effect between intervention and control wards.

## 21 22 23 **DECLARATIONS**

### 24 25 *Funding*

26 This study was funded by the National Institute for Health Research under its Programme  
27 Grants for Applied Research scheme ('Improving patient safety through the involvement of  
28 patients', RP-PG-0108-10049). The views expressed are those of the authors and not  
29 necessarily those of the NHS, the NIHR or the Department of Health

### 30 31 *Competing interests*

32 The authors declare they have no competing interests

### 33 34 *Authors' contributions*

35 RL, GA and JW are grant holders of the programme grant. LS devised the methodology of  
36 the process evaluation and wrote the qualitative protocol, with assistance from CM. LS, CM  
37 and JOH all collected data. LS and CM analysed and interpreted all data, with intellectual  
38 input from GA. LS and CM co-wrote the first draft of the paper. All authors edited the first  
39 draft of the paper. All authors read and approved the final manuscript.

### 40 41 *Ethics approval and consent to participate*

42 The study was approved by South Yorkshire NHS Research Ethics Committee on 15<sup>th</sup> March  
43 2013 (Ref: 13/YH/0077). All participants gave informed consent to take part in this study.

### 44 45 *Acknowledgements*

46 Thanks for Gemma Louch, Jane Heyhoe and Yvonne Birks for research assistance in  
47 conducting some of the telephone interviews

### 48 49 *Data sharing statement*

50 Unpublished data is not available

## 51 52 53 **FIGURE HEADINGS**

54 Appendix 1 – Key intervention components and anticipated outcomes

55 Appendix 2 – Trial design and results

56 Appendix 3 – Holly ward pen portrait

57 Appendix 4 – diagram of engagement typologies

**REFERENCES**

1. Bacon N. A smoke-alarm for patient safety and healthcare quality. Neil Bacon Blog2010 [Web Log]. Retrieved June 2015. <http://neilbacon.wordpress.com/2010/12/13/a-smoke-alarm-for-patient-safety-and-healthcare-quality/>
2. Francis R: Report of the Mid Staffordshire NHS Foundation Trust Public Inquiry. London: The Stationery Office; 2013.
3. Berwick D: Improving the safety of patients in England. London: Department of Health; 2013.
4. Keogh B: Review into the quality of care and treatment provided by 14 hospital trusts in England: overview report. London: Department of Health; 2013.
5. Giles S, Lawton R, Din I, McEachan R: Developing a patient measure of safety (PMOS). *BMJ Quality & Safety* 2013, 22:554-562.
6. McEachan R, Lawton R, O'Hara J, et al: Developing a reliable and valid patient measure of safety in hospitals (PMOS): a validation study. *BMJ Quality & Safety* 2014, 23:565-573.
7. O'Hara J, Lawton R, Armitage G, et al. The Patient Reporting and Action for a Safe Environment (PRASE) Intervention: A feasibility study. *BMC Health Services Research*, 2016, 16:676
8. Sheard L, O'Hara J, Armitage G, et al. Evaluating the PRASE patient safety intervention-a multi-centre, cluster trial with a qualitative process evaluation: study protocol for a randomised controlled trial. *Trials*, 2014, 15: 420.
9. Lawton et al. Can patient involvement improve patient safety? A cluster randomized control trial of the Patient Reporting and Action for a Safe Environment (PRASE) Intervention. *BMJ Quality & Safety*, 2017, doi: 1136/bmjqs-2016-005570
10. Lamont T & Warring J. Safety lessons: shifting paradigms and new directions for patient safety research *Journal of Health Services Research and Policy* 2015, 20 (15) 1-8
11. Oakley A, Strange V, Bonell C et al: Process evaluation in randomised controlled trials of complex interventions. *BMJ* 2006, 332:413-416.
12. Grant A, Treweek S, Dreischulte T et al. Process evaluations for cluster randomised trials of complex interventions: a proposed framework for design and reporting. *Trials*, 2013, 14:15
13. Elford J, Sherr L, Bolding G et al. Peer led HIV prevention among gay men in London: process evaluation *AIDS care* 2002, 14 (3) 351-360
14. Dixon-Woods M, Myles L, Tarrant C, Bion J. Explaining Matching Michigan: an ethnographic study of a patient safety program *Implementation Science* 2013, 8:70
15. Pleschberger S, Seymour J, Payne S, et al. Interviews with end of life care for older people: reflections on six European studies *Qualitative Health Research* 2011, 21 (11) 1588-1600

- 1  
2  
3 16. Tod A, Lusambili A, Homer C et al. Understanding the factors influencing vulnerable older  
4 people keeping warm and well in winter: a qualitative study using social marketing  
5 techniques. *BMJ Open* 2012  
6
- 7 17. Nettleton S, Neale J, Stevenson C. Sleeping at the margins: a qualitative study of  
8 homeless drug users who stay in emergency hostels and shelters. *Critical Public Health*  
9 2012, 22 (3) 319-328  
10
- 11 18. Layder D: *Sociological Practice: Linking Theory and Research*. London: Sage; 1998.  
12
- 13 19. Damschroder L, Aron D, Keith R et al. Fostering implementation of health services  
14 research findings into practice: a consolidated framework for advancing implementation  
15 science *Implementation Science*, 2009, 4:50  
16
- 17 20. Taylor S, Dy S, Foy R et al. What context features might be important determinants of  
18 effectiveness of patient safety practice interventions? *BMJ Quality & Safety*, 2011, 20: 611-  
19 617  
20
- 21 21. Dixon-Woods M, Baker R, Charles K, et al. Culture and behaviour in the English National  
22 Health Service: an overview of lessons from a large multi method study. *BMJ Quality &*  
23 *Safety* 2014, 23, 106-115  
24
- 25 22. Dixon-Woods M, Bosk C, Aveling E et al. Explaining Michigan: Developing an ex post  
26 theory of a quality improvement program. *Milbank Quarterly*, 2011, 89 (2) 167-205  
27
- 28 23. Coutler, A. et al. (2014). Collecting data on patient experience is not enough: they must  
29 be used to improve care. *BMJ*, doi: <http://dx.doi.org/10.1136/bmj.g2225/>  
30
- 31 24. Gkeredakis, E. et al. Mind the Gap: understanding utilisation of evidence and policy in  
32 health care management practice. *Journal of Health Organization and Management*, 2011,  
33 25(3), pp. 298-314.  
34
- 35 25. Sheard L, Marsh C, O'Hara J t al. The Patient Feedback Response Framework –  
36 Understanding why UK hospital staff find it difficult to make improvements based on patient  
37 feedback: A qualitative study. *Social Science & Medicine*, 2017, 178, 19-27  
38
- 39 26. McMullen H, Griffiths C, Leber W, Greenhalgh T. Explaining high and low performers in  
40 complex intervention trials: a model based on diffusion of innovations theory. *Trials*, 2015,  
41 16: 242  
42  
43  
44  
45  
46  
47  
48  
49  
50  
51  
52  
53  
54  
55  
56  
57  
58  
59  
60

# BMJ Open

## Exploring how ward staff engage with the implementation of a patient safety intervention: A UK based qualitative process evaluation

|                                 |                                                                                                                                                                                                                                                                                                                                                                                                                                                                                             |
|---------------------------------|---------------------------------------------------------------------------------------------------------------------------------------------------------------------------------------------------------------------------------------------------------------------------------------------------------------------------------------------------------------------------------------------------------------------------------------------------------------------------------------------|
| Journal:                        | <i>BMJ Open</i>                                                                                                                                                                                                                                                                                                                                                                                                                                                                             |
| Manuscript ID                   | bmjopen-2016-014558.R3                                                                                                                                                                                                                                                                                                                                                                                                                                                                      |
| Article Type:                   | Research                                                                                                                                                                                                                                                                                                                                                                                                                                                                                    |
| Date Submitted by the Author:   | 02-May-2017                                                                                                                                                                                                                                                                                                                                                                                                                                                                                 |
| Complete List of Authors:       | Sheard, Laura; Bradford Institute for Health Research, Marsh, Claire; Bradford Institute for Health Research<br>O'Hara, Jane; Bradford Institute for Health Research; University of Leeds, Medical Education<br>Armitage, Gerry; University of Bradford Faculty of Health Studies<br>Wright, John; Bradford Institute for Health Research<br>Lawton, Rebecca; University of Leeds, Institute of Psychological Sciences; Bradford Institute for Health Research, Quality and Safety Research |
| <b>Primary Subject Heading</b>: | Health services research                                                                                                                                                                                                                                                                                                                                                                                                                                                                    |
| Secondary Subject Heading:      | Qualitative research                                                                                                                                                                                                                                                                                                                                                                                                                                                                        |
| Keywords:                       | Organisation of health services < HEALTH SERVICES ADMINISTRATION & MANAGEMENT, Quality in health care < HEALTH SERVICES ADMINISTRATION & MANAGEMENT, QUALITATIVE RESEARCH                                                                                                                                                                                                                                                                                                                   |
|                                 |                                                                                                                                                                                                                                                                                                                                                                                                                                                                                             |

SCHOLARONE™  
Manuscripts

only



1  
2  
3 Exploring how ward staff engage with the implementation of a patient  
4 safety intervention: A UK based qualitative process evaluation  
5  
6

7 Laura Sheard  
8 laura.sheard@bthft.nhs.uk  
9 Bradford Institute for Health Research, United Kingdom  
10

11 Claire Marsh  
12 claire.marsh@bthft.nhs.uk  
13 Bradford Institute for Health Research, United Kingdom  
14

15 Jane O'Hara  
16 jane.o'hara@bthft.nhs.uk  
17 Bradford Institute for Health Research & University of Leeds, United Kingdom  
18

19 Gerry Armitage  
20 g.r.armitage@brad.ac.uk  
21 University of Bradford, United Kingdom  
22

23 John Wright  
24 john.wright@bthft.nhs.uk  
25 Bradford Institute for Health Research, United Kingdom  
26

27 Rebecca Lawton  
28 r.j.lawton@leeds.ac.uk  
29 Bradford Institute for Health Research & University of Leeds, United Kingdom  
30

31 Corresponding author:  
32 Laura Sheard  
33 Bradford Institute for Health Research  
34 Bradford Teaching Hospitals  
35 Bradford Royal Infirmary  
36 Duckworth Lane  
37 Bradford  
38 BD9 6RJ  
39 United Kingdom  
40  
41  
42  
43  
44  
45  
46  
47  
48  
49  
50  
51  
52  
53  
54  
55  
56  
57  
58  
59  
60

## ABSTRACT

*Objectives* – A patient safety intervention was tested in a 33 ward randomised controlled trial. No statistically significant difference between intervention and control wards was found. We conducted a process evaluation of the trial and our aim in this paper is to understand staff engagement across the 17 intervention wards.

*Design* – Large qualitative process evaluation of the implementation of a patient safety intervention.

*Setting and participants* – NHS staff based on 17 acute hospital wards located at five hospital sites in the North of England.

*Data* – We concentrate on three sources here: i) analysis of taped discussion between ward staff during action planning meetings ii) facilitators' field notes iii) follow up telephone interviews with staff focussing on whether action plans had been achieved. The analysis involved the use of pen portraits and adaptive theory.

*Findings* – First, there were palpable differences in the ways that the 17 ward teams engaged with the key components of the intervention. Five main engagement typologies were evident across the life course of the study: consistent, partial, increasing, decreasing and disengaged. Second, the intensity of support for the intervention at the level of the organisation does not predict the strength of engagement at the level of the individual ward team. Third, the standardisation of facilitative processes provided by the research team does not ensure that implementation standardisation of the intervention occurs by ward staff.

*Conclusions* - A dilution of the intervention occurred during the trial because wards engaged with PRASE in divergent ways, despite the standardisation of key components. Facilitative processes were not sufficiently adequate to enable intervention wards to successfully engage with PRASE components.

**STRENGTHS AND LIMITATIONS OF THIS STUDY**

- We devised a process evaluation that had several robust qualitative data collection methods which complemented each other, in order to build a comprehensive and holistic picture of how ward staff implemented the intervention
- Our approach allowed us to reveal how the differing ways in which staff teams engage with the intervention may impact on patient safety changes at a ward level
- Our novel analytic approach utilised pen portrait methodology in a differing way to how it has previously been used in health services research, in order to document the journey of 17 wards interacting with an intervention over an 18 month period
- We have little understanding of whether the implementation of PRASE may have gained traction and fuelled subsequent ward based change once the research team left the field
- The qualitative methods we chose were designed to capture a broad understanding of the contexts in which the intervention was implemented but had we known a priori that engagement was such a significant factor, we may have designed the process evaluation to specifically explore its influence.

## BACKGROUND

Measurement of patient safety has traditionally relied on information from staff such as incident reports or recording information about harms such as falls or pressure sores. Recently, patients have been emphasised as being an important detector for patient safety and likened to the 'smoke detectors' of safety [1]. There is an increasing recognition that hospitals need to find better ways to capture and respond to the concerns of patients regarding the quality and safety of their care [2-4]. However, patients are rarely asked about structural or procedural aspects of care which may contribute towards failures in patient safety. The Yorkshire Quality and Safety group have developed a patient safety intervention called Patient Reporting and Action for a Safe Environment (PRASE). This intervention firstly elicits patient perceptions on how a ward is performing on a series of issues which are known to contribute towards patient safety incidents and secondly assists staff to interpret patient feedback to aid service improvements. This paper provides an account of a qualitative process evaluation of a randomised controlled trial (RCT) where PRASE was tested. PRASE was designed [5, 6], tested for feasibility [7] and trialled [8, 9] between 2010 and 2015. This period has been charted as an era of paradigm shift for patient safety research when the dominant 'measure and manage' orthodoxy has been enriched by approaches sensitive to setting and socio-cultural/ political influences [10]. It became essential for a process evaluation to capture the nuances involved in the PRASE implementation.

Process evaluations have been used to explain sub-optimum outcome effects, specifically whether there was a 'fault' with the intervention itself, its key components or with delivery [11]. Latterly, they are often not only concerned with adherence to original plans, but also with broader issues such as unintended consequences or the strengths and weaknesses of the intervention itself [12]. Some process evaluations have been able to identify a precise 'pinch point' or problem with an essential component of the intervention that caused it to fail. In a UK trial of peer led HIV prevention for gay men in London, no effect was shown. A qualitative process evaluation [13] revealed that the essential component of 'peer educator' had not played out as intended during the course of the trial due to recruitment problems and the inability of peer educators to confidently communicate harm reduction messages to intended targets. Other process evaluations have been able to point to more general cultural or structural reasons why an intervention may not have succeeded. Dixon-Woods et al [14] evaluated why a U.S. developed patient safety intervention - regarding decreasing central line infections in intensive care units - struggled with implementation after the intervention was transferred to a U.K. setting. A post-hoc qualitative evaluation revealed multiple reasons why, largely the result of cultural differences between the U.S and U.K. settings. It is clear from these examples that process evaluations can support the largely 'experimental' aim of RCTs by identifying specific 'pinch points' within an intervention itself or within the context that will help to explain success or failure.

The components of the intervention have been reported in detail elsewhere [8], and the results of the randomised controlled trial which demonstrated no statistically significant effect between the intervention and control wards [9]. A feasibility study was undertaken prior to commencement of the full RCT and details of our logic model and moderating factors are reported in the feasibility write up [7]. Here, we provide a synopsis of the intervention and results of the trial for the reader to be able to view our process evaluation in context. Appendix 1 provides a detailed summary of the cyclical activities and facilitative processes of the intervention that were trialled, alongside anticipated outcomes. Appendix 2 describes the trial design and results. Briefly, this was a cyclical study with two phases of: i) collecting patient feedback about safety from patients at the bedside ii) collation of this data and ward staff interpreting it iii) ward staff action planning to improve patient safety iv) plans then being implemented and monitored.

## METHODS

We conducted a robust process evaluation involving differing qualitative and quantitative methods [8] which gathered comprehensive data about all 17 intervention wards. We drew upon a published framework [12] for designing process evaluations of cluster randomised controlled trials. The main a priori research question was: 'where does the intervention work, how and why?' [8]. In this paper, we have chosen to focus on the 'how?' and 'why?' and present a detailed picture of how staff engaged with the intervention. We now apply our original research question to understand how and why the intervention did *not* work, given the intervention did not have a significant effect on outcomes. Six mixed methods were used in the wider process evaluation but due to the extent and depth of the data collected, we focused intensively on three qualitative methods for the purpose of this paper. The methods described below are those most pertinent to exploring how staff engaged with the intervention in the ways they did, and why. Data was collected between August 2013 to November 2014. NHS ethical approval was granted in March 2013. LS, CM and JOH undertook method one and two. LS and CM conducted method three. LS is a sociologist, JOH is a psychologist and CM has a background in sustainability. All were working as researchers on this study and educated to doctorate level in their respective fields.

### *1. In depth analysis of taped discussion between ward staff*

Action planning meetings (APMs) were digitally recorded for all 17 wards at both phases. At phase two, one ward did not meet so we considered the recordings of 33 APMs. These ranged in length from 27 to 80 minutes (average 43 minutes). Our examination focused on which areas of patient feedback staff chose to make action plans on and which areas they chose not to. We wrote detailed notes whilst listening to the voice file. We structured our notes under the headings: i) Issues seen as important where actions were made (and why) ii) Issues seen as important where no actions were made (and why not) iii) Issues dismissed and reasons for this iv) Comments made by staff about PRASE process/ study/ team v) Comments made by staff about the ward or hospital context.

### *2. Facilitator's field notes*

These notes were written shortly after the APM had finished and captured: i) implicit dynamics between staff, such as body language, tone of voice and other non-verbal cues ii) environmental factors, such as descriptions of the physical space where the meeting was held iii) facilitator's overall impressions. Field notes were brief and gave a 'snapshot' of the meeting. There were three facilitators (LS, CM and JOH) across the 17 intervention wards and each facilitator worked with the same wards across both phases of the study, to ensure continuity. Field notes were also taken at key meetings and events held with Trust senior management personnel (particularly during set up and roll out of the study). These notes assisted in providing the research team with tacit knowledge of the culture of the site in which the intervention was being implemented.

### *3. Follow-up telephone interviews conducted with the APM lead*

The purpose of these short, structured phone interviews was to ascertain whether action plans had been successfully implemented or not and why. They were conducted around six months after the APM, with the 'PRASE lead' for each ward. Each ward was responsible for nominating a named member of ward staff - who was part of the action planning meeting - to be the PRASE lead. This could be any member of the team but was more often than not the person who volunteered for the role was a senior nurse. A structured interview guide was used. Researchers had a proforma in front of them which contained details about each action plan per ward and they asked the PRASE lead whether each action plan had been implemented – yes, no or partially. Open questioning then continued to understand the factors surrounding this. Five additional questions were asked which focussed on the PRASE lead's opinion of the facilitative processes embedded in the study.

1  
2  
3 For the purpose of this paper, we wanted to understand **qualitatively** how wards had  
4 engaged (or not) with the PRASE intervention. Implementation fidelity (which captures  
5 adherence to specific intervention components) is reported quantitatively elsewhere [9].  
6 Engagement of staff with an intervention can be considered as closely aligned but different  
7 from this, referring more to the differing approaches and attitudes that staff take to the task in  
8 hand (implementation of different components of the intervention). This is different to  
9 whether they have simply delivered the task or not. We decided not to adhere to a  
10 numerical/scale definition of 'engagement' whereby differing wards attained a binary  
11 definition of either 'engaged' or 'disengaged' with the intervention. Instead, we undertook a  
12 nuanced analysis of staff approaches and attitudes to: conducting an action planning  
13 meeting, creating quality action plans and implementation of these action plans. We  
14 explored 'engagement' as a concept that we define as the 'depth' and 'nature' of ward teams'  
15 approaches and attitudes to the intervention.  
16

17 Informed by this understanding of engagement, a synthesis of the above data sources has  
18 provided us with a rich account of the '**engagement trajectory**' of each ward and this was  
19 realised by creating a pen portrait of engagement. Pen portraits have been used previously  
20 in applied health research in fields as diverse as: end of life care [15], vulnerable old people  
21 being enabled to keep warm in their homes [16] and sleeping practices amongst homeless  
22 drug users [17]. Previously, they have provided a narrative account of a 'typical' participant in  
23 qualitative studies or as an analytic aide memoir. We used them in a slightly different manner  
24 to document the 'journey' of the wards throughout the trial from the perspective of the  
25 researcher who had worked closely with these wards for over 18 months. There is a lack of  
26 methodological literature pertaining to the construction of a pen portrait and this has been  
27 left to the discretion of individual research teams. We created a basic structure for the pen  
28 portraits which centred on the writing of a linear, longitudinal account of how each ward had  
29 engaged with relevant key components of the intervention and the contextual factors which  
30 influenced this, ensuring that all three data sources were drawn upon. We did not use an  
31 existing theory or framework on which to extract the data for the pen portraits as we wanted  
32 the emergent findings to arise inductively from the data set. As staff engagement was our  
33 focus, we included as much material on this as possible (along with explanatory factors and  
34 necessary description). We excluded minutiae which did not add to the 'big picture' of the  
35 ward team's engagement to maintain a focussed pen portrait. The pen portrait for Holly ward  
36 is shown in Appendix 3 with the prose annotated as an illustration of how portraits were  
37 constructed from the three data sources outlined above.  
38

39 Researchers took into account all the information contained within the pen portrait and  
40 attributed an overall 'engagement trajectory' label to each ward. Author A wrote all pen  
41 portraits for Trusts A and B and Author B for Trust C. We categorised the 17 different ward  
42 engagement trajectories into five main 'engagement typologies', which emerged from an  
43 analytical session centring mainly on consensus discussion between Author A and Author B.  
44 We report three overarching themes in this paper, which are described in detail in the  
45 Findings section which follows. The above categorisation of engagement typologies led to  
46 the content of the first theme. After we were confident of the findings of this first theme, we  
47 then used the differences in engagement detailed in this theme to progress to themes two  
48 and three. To achieve this, we looked between and across the engagement trajectories of all  
49 17 wards in order to understand how engagement with the intervention related to  
50 components of local implementation. We returned to the detail of the pen portraits to  
51 understand commonality and difference and from this we developed the coding framework  
52 for themes two and three. We then checked our assumptions by testing the data in the pen  
53 portraits against our initial coding framework. After minor adaptations, we then coded the data  
54 in all 17 pen portraits. Overall, we used techniques derived from 'adaptive theory' [18] which  
55 allows for high level frameworks and conceptualisations to emerge from data rather than  
56 descriptive themes. Adaptive theory proposes a continual engagement between the arising  
57  
58  
59  
60

empirical data and arising theoretical interpretations of the research, working in a continuous cycle with each cycle generating new explorations.

## FINDINGS

We now set out to understand the ways in which the 17 intervention wards engaged with the intervention. We are interested in how a multiplicity of engagement styles could have made an already complex intervention become hyper complicated in its implementation phase. This 'hyper complexity' may have served to dilute key elements of the intervention. By 'dilution' we mean 'non-standardisation' of the intervention group, thereby reducing the potential for this to be meaningfully compared with a control group. We explore three high level themes, which emerged from the data. Firstly, we will describe how there were palpable differences in the ways that ward teams engaged with the intervention. Next, we will look at how support for the intervention at the level of the Trust does not indicate ward level support. Lastly, we will demonstrate that standardisation of facilitative processes by the research team does not ensure this filters down to implementation standardisation by ward staff. All quotation extracts are taken from pen portrait notes and all ward names have been ascribed a pseudonym.

### *1. The same intervention can be interacted with in highly divergent ways*

We were able to distinguish the intervention wards into five main 'engagement typologies' (Appendix 4). They are:

- Consistently engaged throughout (7 wards)
- Partially engaged throughout (4 wards)
- Increasing engagement as trial progressed (2 wards)
- Decreasing engagement as trial progressed (2 wards)
- Disengaged throughout (2 wards)

Consistently engaged – This represents the largest category of how wards chose to participate in the trial with 7 out of the 17 residing here. These wards were fully signed up to the ethos of listening to and acting on patient feedback. They took part in a high proportion of the key components of the cyclical activities and made quality action plans which were largely implemented in both phases. A quality action plan can be defined as one which seeks to address issues identified in the patient data and was realistic, relatively timely and more than likely to be achieved. Motivation to take part in the research was high and improving patient safety was even higher.

Partially engaged – These four wards generally did everything asked of them by the research team and largely participated in intervention components but were sometimes lacklustre in their motivation towards improving patient safety. At times, it felt like action planning was just 'going through the motions'. The ability of staff to implement action plans was mixed although this was sometimes due to external factors rather than inertia on the part of the ward staff themselves.

Increasing engagement – These two wards began their involvement with the trial in an ambivalent and – in the case of Maple ward – even hostile manner. However, as the study progressed and the ward staff began to understand what the research team were trying to achieve, engagement with the study solidified. The similarity between these two wards (despite being at different Trusts) is that the turning point for their engagement was attendance at the peer centred Mid-Point Meeting. This is reflected in Maple ward's complete U-turn with implementation of quality action plans at phase two as compared with partial implementation of weak action plans at phase one.

1  
2  
3 Decreasing engagement – Conversely, another two wards engaged with the study relatively  
4 well at the beginning but, over time, slipped in their level of interest and involvement. Cherry  
5 ward is the only ward across all 17 who did not meet in an APM in phase two. The follow up  
6 telephone interview revealed that the ward manager for Cherry did not believe the study was  
7 a priority. Oak ward had ambitious plans for their phase one action planning but had become  
8 dejected by the amount of time their plan was taking to come into effect. Subsequently, they  
9 declined to make an action plan in the phase two APM and appeared disengaged in the  
10 study.

11  
12 Disengaged throughout – Although these two wards met in APMs for both phases of the trial,  
13 they were not interested in using the PRASE data to improve patient safety and viewed the  
14 study as a burden. However, the reasons for this response differed. Rowan were a low  
15 performing ward whose ward manager preferred to concentrate on the other initiatives rather  
16 than our research study. Elm ward were outwardly hostile to the ethos of the study, critical of  
17 the comments their patients had made to researchers and defensive of staff members.  
18 Despite agreeing to hold an APM, they consistently refused to make action plans.

19  
20 Through an examination of these differing engagement trajectories, we can unpick where  
21 parts of the intervention may have led to divergent strategies for local implementation of the  
22 intervention on a ward-by-ward basis. These findings from ‘on the ground’ implementation by  
23 ward teams directly contradict some of the core assumptions held by the research team at  
24 the outset of intervention development - namely, that by providing facilitative processes,  
25 wards would be able to implement in a uniform manner. It is this aspect of a chasm between  
26 implementation expectations and reality which we now turn our attention to.

## 28 *2. Trust-level support for an intervention does not predict the strength of ward-level 29 engagement*

30 A key assumption was that strong corporate, managerial-level support by the three  
31 participating Trusts would facilitate high-level engagement by wards. However an  
32 examination of the differing types of engagement trajectories, shown in Appendix 4, throw  
33 doubt on this assumption and we can find little consistency in engagement style between the  
34 wards at the same Trust. For instance, Trust A is a small district general hospital in a semi-  
35 rural, affluent area. This Trust prides itself on being a forward thinking, cohesive workplace  
36 and senior management support for this intervention was exceptionally strong. However,  
37 when reduced down to the level of the ward, we can see that the four intervention wards at  
38 Trust A are represented across four distinct engagement trajectories (Consistent = Beech,  
39 Increasing = Maple, Decreasing = Oak, Disengaged = Elm). Engagement trajectories for  
40 each of the other two Trusts also differed considerably by ward. The implication here is that  
41 corporate culture - and receptivity to patient feedback at the level of the organisation - is not  
42 a simple predictor of engagement at ward level.

43  
44  
45 Unpicking these differences further, we find that despite a uniform message about the  
46 importance of a multi-disciplinary approach to the study, wards seem to have interpreted this  
47 differently. Oak ward convened a strong first multi-disciplinary APG with representatives from  
48 nursing, allied health professionals and support staff. In contrast, on some wards PRASE  
49 remained led and implemented by just one or two nursing staff. For example, Maple’s first  
50 APG consisted of just the ward manager and pen portrait notes illustrate why:

51  
52 *A very tense meeting held with just the ward manager who appeared overtly stressed  
53 and about to implode. It was clear at this first APM that the ward manager had not  
54 understood the purpose of the study and became upset by some of the negative  
55 comments which her patients had made in the report. It was a difficult APM to  
56 convene as the ward manager thought she had to solve everything by herself and  
57 this was partially reinforced by the fact that she had not invited any of her staff to the  
58 APM (Maple, Trust A)*



1  
2  
3  
4 The research team never envisaged that the intervention would be taken on by just one or  
5 two members of ward staff and this was actively discouraged throughout but still persisted in  
6 five wards at phase one and six wards at phase two, across the 17 intervention wards. It is  
7 difficult to suggest a clear reason why this happened but it was often related to:

- 8 • Front line issues, such as no staff available to be released from direct patient care to  
9 attend APG
- 10 • A minority of ward managers viewing the study as yet another patient safety initiative  
11 that they just needed to 'get on with'
- 12 • A misunderstanding of the multi-disciplinary nature of the intervention.

13 Of most interest is the severe paucity of medical staff involved in the intervention with only  
14 four wards (all at Trust C) involving a medic. This was unforeseen at the outset and may  
15 have contributed to action plans that were narrower in scope than those generated by a  
16 strong MDT. Even those wards who managed to convene a strong multi-disciplinary APG in  
17 phase one were often not able to sustain this level of input going into phase two. Towards  
18 the end of the study, it was disappointing to see that PRASE had unwittingly become badged  
19 as a 'nursing initiative'. Medical and allied health professional input declined over time and  
20 the workload was disproportionately being shouldered by individual Ward Managers  
21 (managerial nurses) who were for the most part already overloaded in their daily clinical  
22 roles.  
23

24 Furthermore, an assumption was that a tight, coherent and most importantly *consistent*  
25 group of staff would engage with the intervention throughout the 14 months of staff  
26 involvement. In reality, staff movement around the NHS estate was high. This led to  
27 difficulties regarding ownership of action planning with some staff reluctant to proceed with  
28 action plans devised by their predecessors and others not believing it was worth the effort to  
29 become involved in the study if they were moving on shortly. A few ward teams changed  
30 their personnel completely between phase one and two of the study due to managerial  
31 reorganisation:  
32

33  
34 *A massive change in staffing took place around the latter part of Phase one with a*  
35 *new Ward Manager and 80-85% change in ward staff. The second phone interview*  
36 *revealed that other ward initiatives were taking place...the whole PRASE process*  
37 *was never wholly embraced because of intense ward improvement work, and staff*  
38 *flux, taking place at the same time (Chestnut ward, Trust C)*  
39

40 It was never anticipated that such wholesale change would take place at the level of the  
41 individual ward teams within the lifetime of the trial and the intervention was unprepared for  
42 this. There was little formal capacity to continually re-introduce PRASE to new ward staff,  
43 despite researchers having to perform this ad hoc and unexpected role. Critically, it points to  
44 ownership of the intervention on the ground as a key factor in success. The engagement  
45 with the intervention becomes weak if it is passed around large numbers of different staff or  
46 if staff groups change on a dramatic scale.  
47

### 48 *3. Standardisation of facilitative processes by the research team does not necessarily* 49 *ensure implementation standardisation by ward staff*

50 A key intention of the facilitative processes was to ensure standardisation of implementation  
51 by ward staff. The process evaluation found that, in reality, these uniform training and  
52 facilitative processes resulted in little standardisation of approach to action planning  
53 regarding a) the issues which staff chose to focus on or b) whether the action plans were  
54 successfully implemented (or not). Our pen portraits point to three main issues that appear  
55 to underpin why:  
56  
57  
58  
59  
60

- Implementation of action plans were often related to buy in and collegiate working with other departments, some of whom were not willing to spend time, resource and effort on an issue which was not their own
- Existing pan-Trust safety and quality campaigns were prioritised over and above PRASE, to differing degrees which variably helped or hindered PRASE intentions
- Success was often the result of a complex interplay between the personal will of the staff involved in the APG and whether the study fitted into current ward priorities

The following pen portrait excerpt from Apple ward exemplifies the first identified issue regarding buy in from other departments. This ward had several negative comments from patients that pain relief was not being given in a timely manner. To address this, the APG decided they needed assistance from pharmacy but this was not forthcoming and APG members were disappointed. This led to the contradictory position in phase two of engagement still being very present but the act of action planning itself becoming tokenistic:

*This ward stayed engaged with the project the entire way through despite setbacks with their earliest action plan. The ward manager in particular clearly understood the purpose of the study and was sympathetic to receiving patient feedback. However, inertia may have crept in as their 'outside the box' thinking in phase one did not get any buy in from the pharmacy department. Action planning in phase two then became perfunctory even though engagement was still high (Apple, Trust B)*

The second issue of other safety campaigns being prioritised above this study relates to the capacity with which ward staff have within their normal clinical roles to be able to undertake improvement work. In several of the pen portraits, PRASE was described as “just one of many improvement initiatives which this ward are involved in”. Wards were under pressure to take part in hospital wide initiatives that executive teams had deemed to be of most importance. Whilst there was senior support for PRASE, it was not always significant in comparison to other initiatives. In some cases, the existence of other high profile campaigns supported staff in achieving their PRASE action plans. Trust C launched a well-received “Hello my name is...” patient experience campaign tying into national acknowledgement of the need for staff to introduce themselves and communicate better with patients at the bedside. On the wards where PRASE feedback had also drawn attention to this need, staff were supported to respond (through badges, awareness training and senior-support) to do so.

However, the flip-side of attention on more high-profile campaigns meant that – for some wards – PRASE became sidelined. Associated with this was a feeling of patient safety and quality ‘fatigue’ with the amount of initiatives in this area felt too numerous and therefore burdensome on staff time:

*I got the sense that the ward manager saw PRASE as just another audit which she needed to go through the motions of...At one point during phase two, she admitted that in phase one she did not see the value in the study as she thought it just replicated other patient experience measures her ward is involved in. However, now she appreciates how it is different from the other measures...Working out where PRASE fitted in with other initiatives seemed to be a big issue for this ward manager (Pine Ward, Trust B)*

One strong finding to emerge was the use of PRASE data to reinforce safety or quality issues which the ward staff knew about tacitly but did not have robust data about in order to report to senior management. This finding emerged as a divisive issue. Some wards were pleased that the PRASE study reinforced staff opinion about the ward or validated on a larger scale the results of local audits. However, a minority of staff became irritated and instead viewed it as duplication.

## DISCUSSION

As introduced at the outset, some process evaluations are able to reveal specific 'pinch points' within the intervention itself [13], or within the overall setting in which it was applied [14], which help to explain why no effect was seen. The Consolidated Framework for Advancing Implementation Research advocates the 'inner setting' of an organisation as being influential in whether or not implementation can be achieved, where attention must be paid to the domains of: structural characteristics, networks and communications, culture, implementation climate [19]. Our process evaluation found that this inner setting was so varied between wards within the intervention group that this led to a general 'dilution' of intervention implementation. We found striking differences between wards across all the above domains of 'inner setting' – stability of ward teams, quality of relationships between different wards, basic assumptions towards receiving patient feedback and a learning climate (or lack of one). Significantly, we saw changes to the 'inner setting' constructs over time. The in-depth analysis of what happened within the intervention group generates useful insights for implementation of, and staff engagement with, patient safety initiatives to which we will now turn our attention.

The improvement of patient safety is already acknowledged as a cultural issue and the importance of factors such as teamwork, leadership and organisational processes operating at and between multiple levels [20]. Navigating this territory - particularly the link between 'sharp end' ward safety initiatives and 'blunt end' corporate planning - has been documented as a necessary challenge. Initiatives which do not pay adequate attention in this regard are at best destined to fail, and at worst may over-burden already de-motivated staff [21]. The facilitative processes incorporated into PRASE were designed to help address this challenge. These processes arose from the findings of feasibility testing of the intervention [7] where our research team found that, for example, access to senior management at regular intervals and assistance in interpreting patient feedback were important factors which may support action planning. The assumption was that by providing these processes, staff would be better placed to successfully navigate complex organisational territory. It was anticipated this would allow some uniformity amongst the intervention group. In actuality, the facilitative processes were not adequate to ensure any such uniformity.

Dixon-Woods et al (2011) [22] developed a post theorisation of why impressive results were seen in the original Michigan intervention - to decrease central line infections - in the U.S. Six reasons are proposed as to why the program worked. Of particular applicability is the 'creation of a networked community' where ward teams came together to build rapport and support for each other whilst identifying and resolving common barriers. Although part of the facilitative processes within the PRASE intervention aimed to attend to this need, it is likely that the community of wards involved in the study never reached a critical threshold in becoming an organic community who regularly reached out to each other. Further, specific leaders were targeted in the Michigan programme including hospital executives and clinical team leaders. This involvement of leaders at differing levels of the organisation is theorised as being integral to the success of the programme. Conversely, we found that involving senior management and matrons prior to the start of the study and then throughout its entirety had minimal effect on strengthening engagement with the intervention on the ground by frontline ward staff. Questions regarding the ability of senior management to support consistency of intervention adoption throughout an organisation, and the processes required to enable this further, were raised by our study and certainly warrant further exploration.

In this study, the relationships between different parts and levels of the organisation from senior management to ward teams to individuals were vital in achieving success. When these levels align well, as they appeared to do in one Trust - with respect to a culture shift around introducing and communicating to patients via an external patient experience campaign - it appears that much can be achieved. When they do not – e.g. Apple ward who did not get buy in from the pharmacy department - staff at the ward level can become

1  
2  
3 frustrated and demotivated. We therefore question the capacity of an externally designed  
4 intervention, even one with significant resources and facilitative processes, to provide the  
5 mechanisms to be continually adaptive to the organisational alignment between the sharp  
6 and blunt end at differing institutions. The challenges revealed here are about deeper  
7 organisational culture, systems and processes that need longer-term development.  
8  
9

10 Our findings support the growing understanding that emphasis in patient safety research  
11 must continue to shift from the measure and manage orthodoxy of data collection to  
12 interpretation and process [10]. In this research, the collection of patient feedback was the  
13 least problematic element. The complexity of what staff are being asked to do in  
14 interventions like PRASE (navigating multi-layered organisational systems to implement  
15 improvements) requires much more consideration. In the broader but related policy area of  
16 patient experience, the overt emphasis and huge resource allocated to collecting patient  
17 experience data has not been matched by efforts to utilise and evaluate the impact of  
18 feedback on service improvement [23]. There is increasing recognition that using data  
19 sources to change practice demands creativity and skills from staff; hence the tendency to  
20 present staff with data and expect change to happen as a result [24]. Our intervention  
21 considered these issues a priori and hence facilitative processes were built into the trial yet  
22 they were not sufficiently robust enough to ensure a standardised implementation across  
23 intervention wards.  
24

25 One interpretation of PRASE could be that it 'failed' due to showing no effect between the  
26 intervention and control wards. We believe this a simplistic view which does not take into  
27 account the wealth of positive benefits which patients and staff gained. Firstly, it showed that  
28 patients are able to give feedback about the safety and quality of care and that they want to  
29 do this en masse (our consent rate was 85% of those patients approached by researchers  
30 and the number of patients recruited to the study was 2400 across five different hospital  
31 sites). Secondly, the process evaluation showed that most staff *do* believe the patient voice  
32 is important and there is an imperative to listen to, and act on, this voice. Thirdly, despite  
33 local struggles, most staff do want to action plan to improve their patients' care. The majority  
34 of the wards were receptive to receiving patient feedback – it is when they tried to move  
35 improvement work forward that problems arose [25]. An additional gain which some staff  
36 identified was the ability of the patient feedback to allow staff to understand not only the  
37 patient perspective but also their priorities and to visualise the ward environment and  
38 systems 'through the eyes of the patient'.  
39

#### 40 *Limitations*

41 We cannot know whether positive attitudes towards patient involvement in patient safety  
42 have continued on the intervention wards after the trial was completed. Improvements that  
43 staff were working towards may have gained impetus since the research team left. Equally,  
44 involvement in the trial may have kick-started ideas which, although did not come to fruition  
45 within its life span, may now be fuelling ward level action. Conversely, staff may have felt  
46 disempowered to enact improvement to the ward environment if their PRASE action plans  
47 had floundered. We have no format for measuring this 'after effect' – either positive or  
48 negative – and little scope for knowing at what time point the evidence of a more long lasting  
49 effect may be captured.  
50

51 Our pen portrait methodology is a culmination of all sources of qualitative data collected and  
52 has its inherent weaknesses. This methodology is still in its relative infancy in relation to the  
53 way in which we have utilised it here. We were careful to draw equally on all sources of data  
54 in order to build a comprehensive narrative of the engagement trajectory of each ward.  
55 However, a differing analysis paying attention to fewer sources or an unequal weighing of  
56 sources may have pulled the narrative account in a slightly different direction. Further, it was  
57 difficult to categorise some wards firmly into their allocated engagement typology and  
58  
59  
60

1  
2  
3 arguably some could fit into several. Finally, process evaluation methods were developed a  
4 priori to the start of the trial so the design was very open. We devised a loose structure to  
5 capture qualitative intelligence on key trial processes. If prior knowledge existed that  
6 diversity of engagement within the intervention wards was to be so significant, it may have  
7 been possible to target a particular process evaluation framework for analysing outcomes in  
8 relation to this diversity, such as the 'diffusion of innovation model' [26]. It is a possibility that  
9 utilisation of differing methods may have provided other answers as to where different  
10 elements of the intervention worked, for whom and why.

## 11 12 **CONCLUSION**

13 Whereas previous process evaluations point towards specific pinch points or broader cultural  
14 issues to understand why an intervention showed no effect, this study points to an overall  
15 'dilution effect' of the intervention. This was largely due to wards engaging with the  
16 intervention in highly divergent manners despite the standardisation of key components by  
17 the research team. The facilitative processes were inadequate to ensure full engagement  
18 across all wards in the study. A disconnect existed between senior management support for  
19 the study and how ward staff on the ground engaged with it more locally. The above findings  
20 assist in explaining why the trial saw no effect between intervention and control wards.

## 21 22 23 **DECLARATIONS**

### 24 25 *Funding*

26 This study was funded by the National Institute for Health Research under its Programme  
27 Grants for Applied Research scheme ('Improving patient safety through the involvement of  
28 patients', RP-PG-0108-10049). The views expressed are those of the authors and not  
29 necessarily those of the NHS, the NIHR or the Department of Health

### 30 31 *Competing interests*

32 The authors declare they have no competing interests

### 33 34 *Authors' contributions*

35 RL, GA and JW are grant holders of the programme grant. LS devised the methodology of  
36 the process evaluation and wrote the qualitative protocol, with assistance from CM. LS, CM  
37 and JOH all collected data. LS and CM analysed and interpreted all data, with intellectual  
38 input from GA. LS and CM co-wrote the first draft of the paper. All authors edited the first  
39 draft of the paper. All authors read and approved the final manuscript.

### 40 41 *Ethics approval and consent to participate*

42 The study was approved by South Yorkshire NHS Research Ethics Committee on 15<sup>th</sup> March  
43 2013 (Ref: 13/YH/0077). All participants gave informed consent to take part in this study.

### 44 45 *Acknowledgements*

46 Thanks for Gemma Louch, Jane Heyhoe and Yvonne Birks for research assistance in  
47 conducting some of the telephone interviews

### 48 49 *Data sharing statement*

50 Unpublished data is not available

## 51 52 53 **FIGURE HEADINGS**

54 Appendix 1 – Key intervention components and anticipated outcomes

55 Appendix 2 – Trial design and results

56 Appendix 3 – Holly ward pen portrait

57 Appendix 4 – diagram of engagement typologies

**REFERENCES**

1. Bacon N. A smoke-alarm for patient safety and healthcare quality. Neil Bacon Blog2010 [Web Log]. Retrieved June 2015. <http://neilbacon.wordpress.com/2010/12/13/a-smoke-alarm-for-patient-safety-and-healthcare-quality/>
2. Francis R: Report of the Mid Staffordshire NHS Foundation Trust Public Inquiry. London: The Stationery Office; 2013.
3. Berwick D: Improving the safety of patients in England. London: Department of Health; 2013.
4. Keogh B: Review into the quality of care and treatment provided by 14 hospital trusts in England: overview report. London: Department of Health; 2013.
5. Giles S, Lawton R, Din I, McEachan R: Developing a patient measure of safety (PMOS). *BMJ Quality & Safety* 2013, 22:554-562.
6. McEachan R, Lawton R, O'Hara J, et al: Developing a reliable and valid patient measure of safety in hospitals (PMOS): a validation study. *BMJ Quality & Safety* 2014, 23:565-573.
7. O'Hara J, Lawton R, Armitage G, et al. The Patient Reporting and Action for a Safe Environment (PRASE) Intervention: A feasibility study. *BMC Health Services Research*, 2016, 16:676
8. Sheard L, O'Hara J, Armitage G, et al. Evaluating the PRASE patient safety intervention-a multi-centre, cluster trial with a qualitative process evaluation: study protocol for a randomised controlled trial. *Trials*, 2014, 15: 420.
9. Lawton et al. Can patient involvement improve patient safety? A cluster randomized control trial of the Patient Reporting and Action for a Safe Environment (PRASE) Intervention. *BMJ Quality & Safety*, 2017, doi: 1136/bmjqs-2016-005570
10. Lamont T & Warring J. Safety lessons: shifting paradigms and new directions for patient safety research *Journal of Health Services Research and Policy* 2015, 20 (15) 1-8
11. Oakley A, Strange V, Bonell C et al: Process evaluation in randomised controlled trials of complex interventions. *BMJ* 2006, 332:413-416.
12. Grant A, Treweek S, Dreischulte T et al. Process evaluations for cluster randomised trials of complex interventions: a proposed framework for design and reporting. *Trials*, 2013, 14:15
13. Elford J, Sherr L, Bolding G et al. Peer led HIV prevention among gay men in London: process evaluation *AIDS care* 2002, 14 (3) 351-360
14. Dixon-Woods M, Myles L, Tarrant C, Bion J. Explaining Matching Michigan: an ethnographic study of a patient safety program *Implementation Science* 2013, 8:70
15. Pleschberger S, Seymour J, Payne S, et al. Interviews with end of life care for older people: reflections on six European studies *Qualitative Health Research* 2011, 21 (11) 1588-1600

- 1  
2  
3 16. Tod A, Lusambili A, Homer C et al. Understanding the factors influencing vulnerable older  
4 people keeping warm and well in winter: a qualitative study using social marketing  
5 techniques. *BMJ Open* 2012  
6
- 7 17. Nettleton S, Neale J, Stevenson C. Sleeping at the margins: a qualitative study of  
8 homeless drug users who stay in emergency hostels and shelters. *Critical Public Health*  
9 2012, 22 (3) 319-328  
10
- 11 18. Layder D: *Sociological Practice: Linking Theory and Research*. London: Sage; 1998.  
12
- 13 19. Damschroder L, Aron D, Keith R et al. Fostering implementation of health services  
14 research findings into practice: a consolidated framework for advancing implementation  
15 science *Implementation Science*, 2009, 4:50  
16
- 17 20. Taylor S, Dy S, Foy R et al. What context features might be important determinants of  
18 effectiveness of patient safety practice interventions? *BMJ Quality & Safety*, 2011, 20: 611-  
19 617  
20
- 21 21. Dixon-Woods M, Baker R, Charles K, et al. Culture and behaviour in the English National  
22 Health Service: an overview of lessons from a large multi method study. *BMJ Quality &*  
23 *Safety* 2014, 23, 106-115  
24
- 25 22. Dixon-Woods M, Bosk C, Aveling E et al. Explaining Michigan: Developing an ex post  
26 theory of a quality improvement program. *Milbank Quarterly*, 2011, 89 (2) 167-205  
27
- 28 23. Coutler, A. et al. (2014). Collecting data on patient experience is not enough: they must  
29 be used to improve care. *BMJ*, doi: <http://dx.doi.org/10.1136/bmj.g2225/>  
30
- 31 24. Gkeredakis, E. et al. Mind the Gap: understanding utilisation of evidence and policy in  
32 health care management practice. *Journal of Health Organization and Management*, 2011,  
33 25(3), pp. 298-314.  
34
- 35 25. Sheard L, Marsh C, O'Hara J t al. The Patient Feedback Response Framework –  
36 Understanding why UK hospital staff find it difficult to make improvements based on patient  
37 feedback: A qualitative study. *Social Science & Medicine*, 2017, 178, 19-27  
38
- 39 26. McMullen H, Griffiths C, Leber W, Greenhalgh T. Explaining high and low performers in  
40 complex intervention trials: a model based on diffusion of innovations theory. *Trials*, 2015,  
41 16: 242  
42  
43  
44  
45  
46  
47  
48  
49  
50  
51  
52  
53  
54  
55  
56  
57  
58  
59  
60

**Appendix 1: Key intervention components and anticipated outcomes**

| <b>Cyclical Activities</b>                                                                                                                                                                                                                                                                                                                                                                                                                                                                                                                                                                                                                                                                                                                                                                                                                                                                                                                                                                                                                                                                                                                                                                                                                                                                                                                                                                                                      | <b>Facilitative Processes</b>                                                                                                                                                                                                                                                                                                                                                                                                                                                                                                                                                                                                                                                                                                                                                                                                                                                                                                                                                                                                                                                                                                                                                                                                                                                                                                                                                                                                                  | <b>Anticipated outcomes</b>                                                                                                                                                                                                                                                                                                                                                   |
|---------------------------------------------------------------------------------------------------------------------------------------------------------------------------------------------------------------------------------------------------------------------------------------------------------------------------------------------------------------------------------------------------------------------------------------------------------------------------------------------------------------------------------------------------------------------------------------------------------------------------------------------------------------------------------------------------------------------------------------------------------------------------------------------------------------------------------------------------------------------------------------------------------------------------------------------------------------------------------------------------------------------------------------------------------------------------------------------------------------------------------------------------------------------------------------------------------------------------------------------------------------------------------------------------------------------------------------------------------------------------------------------------------------------------------|------------------------------------------------------------------------------------------------------------------------------------------------------------------------------------------------------------------------------------------------------------------------------------------------------------------------------------------------------------------------------------------------------------------------------------------------------------------------------------------------------------------------------------------------------------------------------------------------------------------------------------------------------------------------------------------------------------------------------------------------------------------------------------------------------------------------------------------------------------------------------------------------------------------------------------------------------------------------------------------------------------------------------------------------------------------------------------------------------------------------------------------------------------------------------------------------------------------------------------------------------------------------------------------------------------------------------------------------------------------------------------------------------------------------------------------------|-------------------------------------------------------------------------------------------------------------------------------------------------------------------------------------------------------------------------------------------------------------------------------------------------------------------------------------------------------------------------------|
| <p>-Patient Measure of Organisational Safety (PMOS) - a 44 item questionnaire which asks patients at the hospital bedside about safety concerns and issues [5, 6].</p> <p>-The second is a reporting proforma for patients to provide detailed safety incidents or positive experiences [7].</p> <p>-The questionnaire items are theoretically-informed from a systems understanding of patient safety whereby experience of care is understood to arise from a complex interaction of factors that include staff team-working and access to resources as well as more traditionally-considered factors such as the physical environment</p> <p>- After patient feedback has been collected it is collated and presented in a feedback report to each ward. Ward staff are then asked to interpret this feedback to identify and target areas for improvement. Finally they are asked to implement agreed action plans and monitor progress in a cyclical manner.</p> <p>- Significant further detail about the cyclical activities is contained in the published protocol of the study [8] and the PRASE RCT results paper [9]</p> <div data-bbox="264 1029 761 1332" data-label="Diagram"> <pre> graph TD     A[Measurement of ward safety] --&gt; B[Feedback to wards]     B --&gt; C[Interpretation in Action Planning Meeting]     C --&gt; D[Implementation of actions &amp; monitoring]     D --&gt; A     </pre> </div> | <p>The design of PRASE recognises that ward staff need support to implement the intervention. An understanding of some of the facilitative processes required was derived from a feasibility study, prior to finalising its design [7]. Specific facilitative processes involved are:</p> <ul style="list-style-type: none"> <li>- <i>Independent collection of patient feedback by the research team</i> to enable not only objectivity but from a resource and logistics viewpoint as ward staff do not have the capacity to collect this data themselves</li> <li>- <i>Independent production of feedback reports by research team</i></li> <li>- <i>Negotiation with senior management</i> by the research team to embed the intervention into usual practice</li> <li>- <i>Ward staff training</i> in interpretation of data and role playing of optimum action planning to enable them to tackle systemic issues effectively</li> <li>- <i>Facilitation of the action planning meetings by a senior researcher</i> to i) convene the meeting ii) encourage ward staff to devise action plans which tackle systemic issues</li> <li>- <i>Motivation of staff and cross team learning and support</i> via the format of three pan Trust meeting involving representatives from the hospital senior management (Start Up meeting pre-trial, Mid-Point meeting half way through trial, Closing meeting after trial had concluded)</li> </ul> | <p>It was hypothesized that the intervention would lead to safety improvements in terms of both ward culture and ward performance (distal outcomes) alongside a development of a shared, collaborative understanding of the patient's perspective of safety (proximal outcomes). For more detail on this, consult the logic model developed from the feasibility work [7]</p> |



**Appendix 2: Trial design and results**

| <b>Trial design</b>                                                                                                                                                                                                                                                                                                                                                                                                                                                                                                                                                                                                                                                                                                                                                                                                                                                                                                                                                                                                                                                                                                                                                                                                                                                | <b>Trial results</b>                                                                                                                                                                                                                                                                                                                                                                                                                                                                                                                                                             |
|--------------------------------------------------------------------------------------------------------------------------------------------------------------------------------------------------------------------------------------------------------------------------------------------------------------------------------------------------------------------------------------------------------------------------------------------------------------------------------------------------------------------------------------------------------------------------------------------------------------------------------------------------------------------------------------------------------------------------------------------------------------------------------------------------------------------------------------------------------------------------------------------------------------------------------------------------------------------------------------------------------------------------------------------------------------------------------------------------------------------------------------------------------------------------------------------------------------------------------------------------------------------|----------------------------------------------------------------------------------------------------------------------------------------------------------------------------------------------------------------------------------------------------------------------------------------------------------------------------------------------------------------------------------------------------------------------------------------------------------------------------------------------------------------------------------------------------------------------------------|
| <p>PRASE was trialled within a multi-centre, cluster, randomised controlled trial. The study was undertaken across 33 hospital wards in three NHS Trusts (five hospital sites). Seventeen wards were randomly assigned to an intervention group and 16 wards to a control group. Feedback was collected from approximately 25 patients per ward, collated and fed back to staff for interpretation and action planning. This whole process was then repeated in a second cycle so staff were able to see changes to feedback over time.</p> <p>The study was powered to detect a small to medium difference (0.3) between the intervention and control groups with respect to a Primary Outcome which was the Patient Safety Thermometer (PST). PST data is routinely collected from every ward in England on a monthly basis and reports on harm free care associated with: i) pressure ulcers, ii) venous thromboembolisms, iii) catheter associated urinary tract infections and iv) falls. PMOS was chosen as a secondary outcome. This was obtained twice from the intervention wards within their intervention cycles. It was also taken at the same three time points in the control wards.</p> <p>For further detail, consult Sheard et al (2014) [8].</p> | <p>No significant effect of the intervention between the allocation groups was found for either of the primary outcomes PST (<math>p=0.98</math>) or PMOS (<math>p=0.09</math>) at 6 or 12 months, nor other secondary outcomes. However, a post hoc analysis on new harms (contained in the PST) found a non-significant increase in harm free care of 1.60 for intervention wards over control wards. All wards were retained throughout the trial. Patient response rate for completing the PMOS tool was 86%.</p> <p>For further detail, consult Lawton et al (2017) [9]</p> |

### Appendix 3 - Holly ward pen portrait

Facilitator's field notes

Phase one – The action planning meeting (APM) consisted of five staff who had all read the report before the meeting. These were: a sister, a staff nurse, a ward clerk and two HCAs. The ward manager had attended the Trust wide PRASE start-up session but was not able to come to the APM so the facilitator had to give an extensive introduction about the study to the group. The ward clerk did not understand what the term 'patient safety' meant so the facilitator had to go back to basics to make sure that everyone in the room knew what PRASE was about.

Taped APM discussion

Facilitator's field notes

The APM was difficult to convene as discussion tended to jump around. The ward clerk was very vocal and the rest of the group seemed to defer to her opinion. Overall, this was a positive meeting and the group seemed engaged with the study by the end of it. The main action plan was to explore whether better systems/communication could be put in place between theatre and the ward to try to reduce the amount of patients who are starved all day only to have their operation cancelled at the last moment. This action plan was challenging in its approach as it sought to redesign well established systems.

Follow up phone interviews

The phone interview found that the action plan about changing the system of communication between theatre and ward was not realised at all because the theatre matron had not responded to the sister about this despite the sister requesting to meet about the issue several times.

Follow up phone interviews

Phase two – The sister attended the Trust wide PRASE midpoint meeting and reported that she found it useful especially to see that many of the problems which patients were reporting on her ward were the same across other wards in the Trust.

Taped APM discussion

Facilitator's field notes

The sister convened another APM although this was smaller in size than the APM in phase one. The failed action plan from phase one about improving communication between theatre and the ward was discussed again. There is acknowledgement that there are not enough qualified staff at night who are able to put a central line in and this is having a knock on effect on the ward. An action plan was developed to talk to the central line team about this problem of lack of qualified staff.

1  
2  
3  
4  
5  
6  
7  
8  
9  
10  
11  
12  
13  
14  
15  
16  
17  
18  
19  
20  
21  
22  
23  
24  
25  
26  
27  
28  
29  
30  
31  
32  
33  
34  
35  
36  
37  
38  
39  
40  
41  
42  
43  
44  
45  
46  
47  
48  
49  
50  
51  
52  
53  
54  
55  
56  
57  
58  
59  
60

Follow up phone interviews

The follow up phone interview for this phase found that implementation had floundered. The APG were far reaching in what they want to happen but were dependent on other departments for buy in and the interest from personnel in other departments was just not there. The sister reported via the phone interview that the Trust are not interested in training more people to be qualified in putting central lines in and the theatre matron is still not interested in rectifying the issue of patients being starved on the ward for days at a time. This ward seemed to be less involved in other safety, quality and experience initiatives than other wards were (even at the same Trust).

Facilitator's field notes

The sister came in on her day off to attend the Trust wide Closing meeting. She was firmly committed to the study throughout and indeed to improving patient safety.

**Engagement profile:** This ward team did everything that was asked of them and they were highly engaged as a group with the purpose of PRASE. They made some far reaching action plans which sought to challenge underlying structural barriers but made little progress with these when they tried to implement them as other departments on which they depended for buy in were not interested. **Engaged throughout despite organisational setbacks.**

Appendix 4 – Diagram of engagement typologies

1  
2  
3  
4  
5  
6  
7  
8  
9  
10  
11  
12  
13  
14  
15  
16  
17  
18  
19  
20  
21  
22  
23  
24  
25  
26  
27  
28  
29  
30  
31  
32  
33  
34  
35  
36  
37  
38  
39  
40  
41  
42  
43  
44  
45  
46  
47

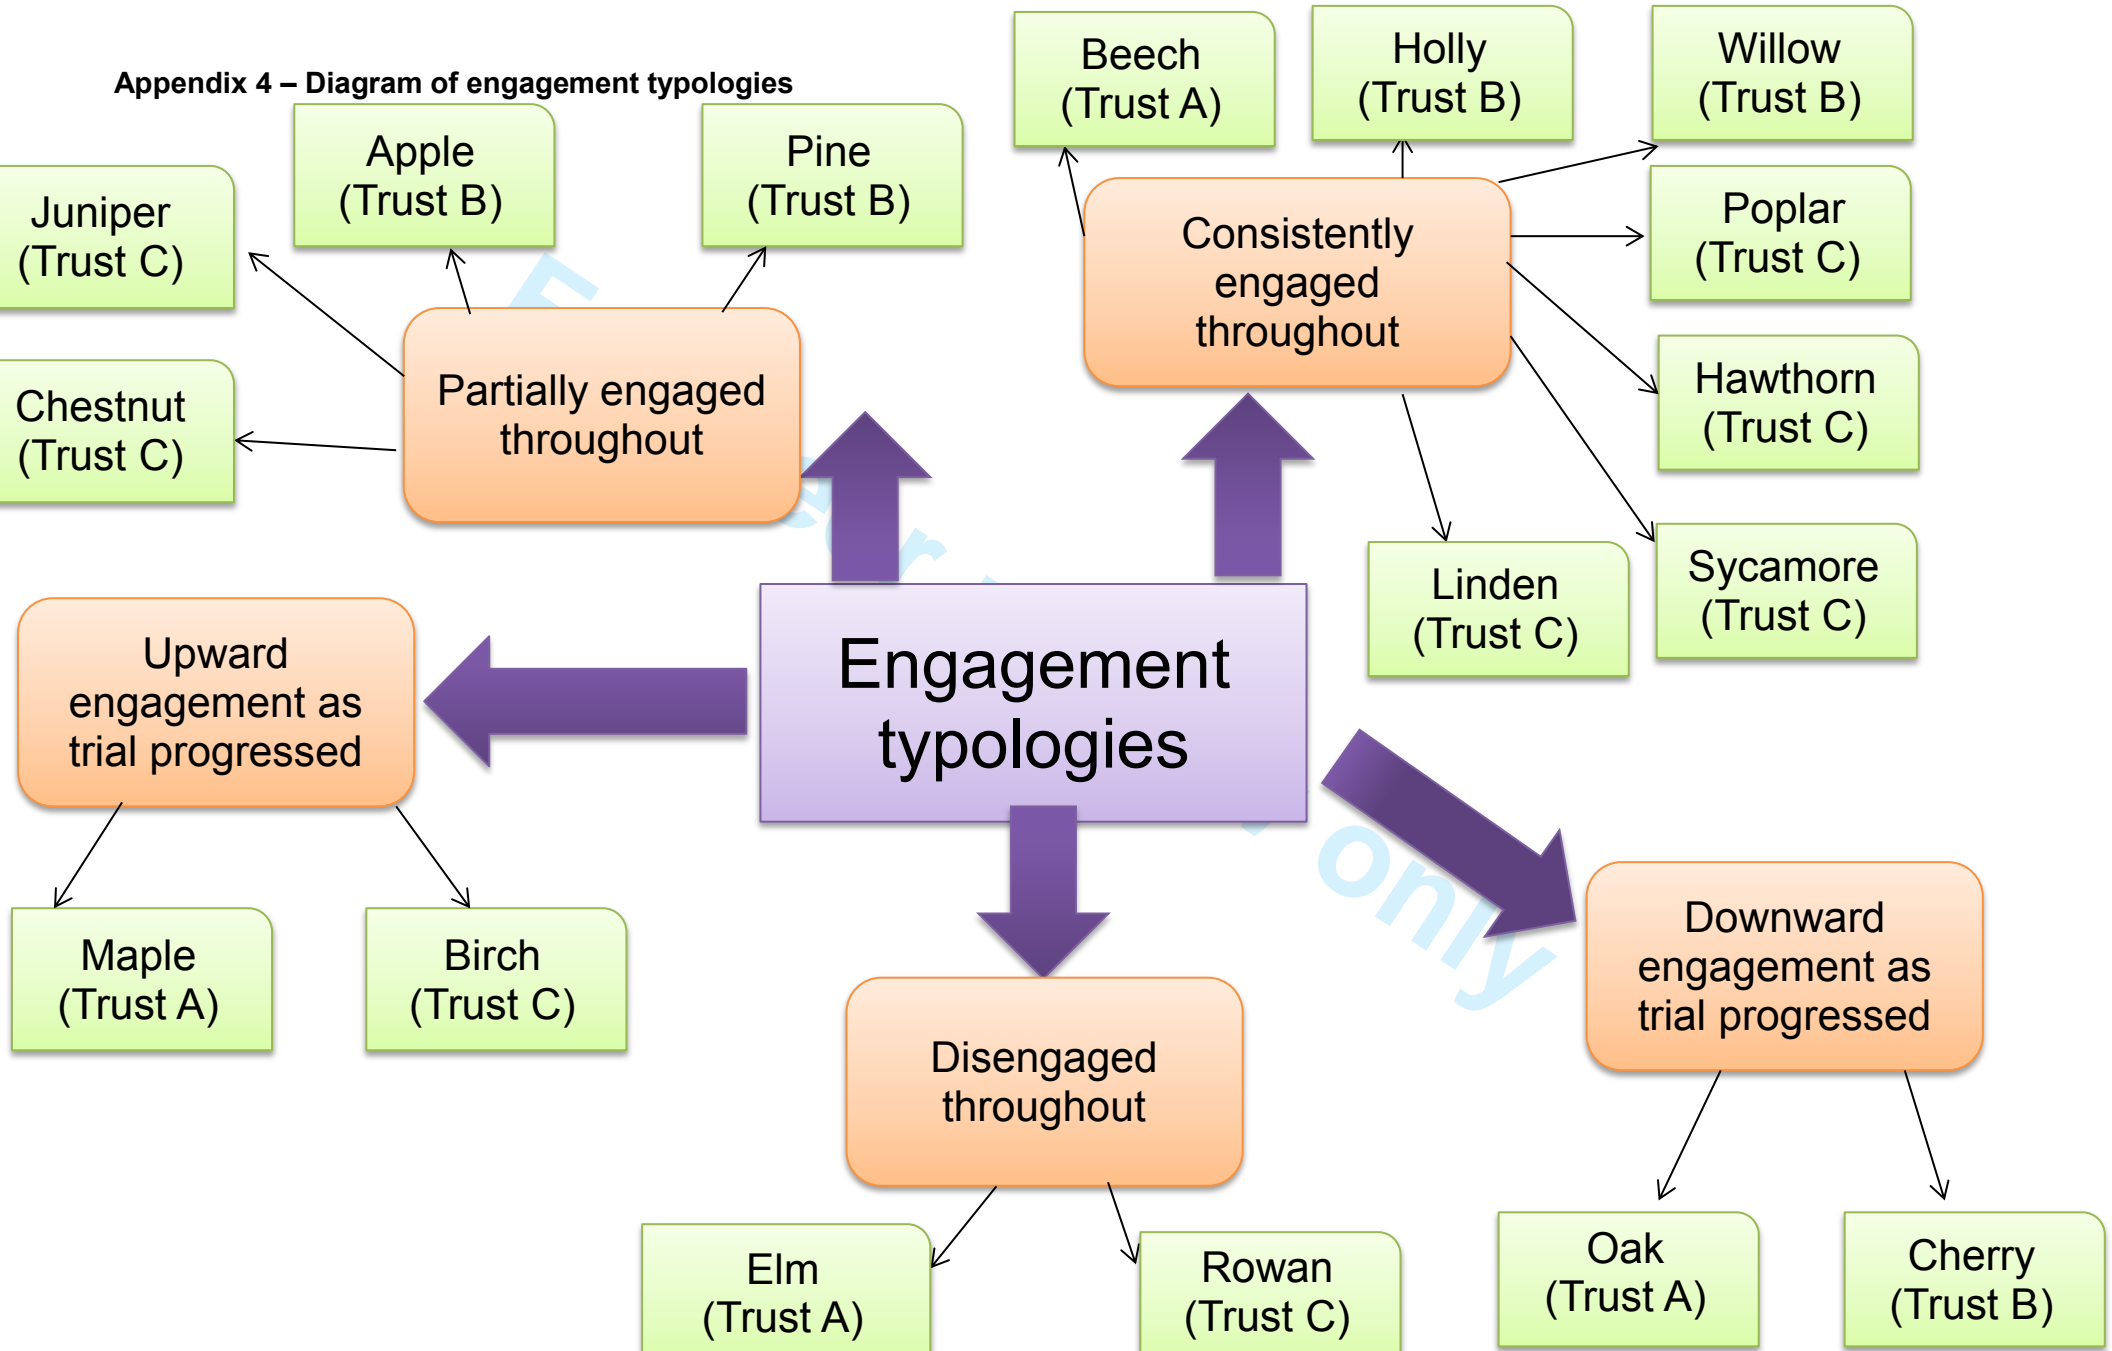

**Manuscript:** Exploring how ward staff engage with the implementation of a patient safety intervention: A qualitative process evaluation

## **Consolidated criteria for reporting qualitative studies (COREQ): 32-item checklist**

Developed from:

Tong A, Sainsbury P, Craig J. Consolidated criteria for reporting qualitative research (COREQ): a 32-item checklist for interviews and focus groups. *International Journal for Quality in Health Care*. 2007. Volume 19, Number 6: pp. 349 – 357

| No. Item                                       | Guide questions/description                                                                                                                | Reported on Page # |
|------------------------------------------------|--------------------------------------------------------------------------------------------------------------------------------------------|--------------------|
| <b>Domain 1: Research team and reflexivity</b> |                                                                                                                                            |                    |
| <i>Personal Characteristics</i>                |                                                                                                                                            |                    |
| 1. Inter viewer/facilitator                    | Which author/s conducted the inter view or focus group?                                                                                    | Top of page 5      |
| 2. Credentials                                 | What were the researcher's credentials?<br>E.g. PhD, MD                                                                                    | Top of page 5      |
| 3. Occupation                                  | What was their occupation at the time of the study?                                                                                        | Top of page 5      |
| 4. Gender                                      | Was the researcher male or female?                                                                                                         | Irrelevant         |
| 5. Experience and training                     | What experience or training did the researcher have?                                                                                       | Top of page 5      |
| <i>Relationship with participants</i>          |                                                                                                                                            |                    |
| 6. Relationship established                    | Was a relationship established prior to study commencement?                                                                                | 5                  |
| 7. Participant knowledge of the interviewer    | What did the participants know about the researcher? e.g. personal goals, reasons for doing the research                                   | 5                  |
| 8. Interviewer characteristics                 | What characteristics were reported about the inter viewer/facilitator? e.g. Bias, assumptions, reasons and interests in the research topic | 5                  |

|                                          |                                                                                                                                                          |                                                                            |
|------------------------------------------|----------------------------------------------------------------------------------------------------------------------------------------------------------|----------------------------------------------------------------------------|
| <b>Domain 2: study design</b>            |                                                                                                                                                          |                                                                            |
| <i>Theoretical framework</i>             |                                                                                                                                                          |                                                                            |
| 9. Methodological orientation and Theory | What methodological orientation was stated to underpin the study? e.g. grounded theory, discourse analysis, ethnography, phenomenology, content analysis | 6                                                                          |
| <i>Participant selection</i>             |                                                                                                                                                          |                                                                            |
| 10. Sampling                             | How were participants selected? e.g. purposive, convenience, consecutive, snowball                                                                       | Universal sample of all intervention wards in study (page 5)               |
| 11. Method of approach                   | How were participants approached? e.g. face-to-face, telephone, mail, email                                                                              | 5                                                                          |
| 12. Sample size                          | How many participants were in the study?                                                                                                                 | 5                                                                          |
| 13. Non-participation                    | How many people refused to participate or dropped out? Reasons?                                                                                          | None (page 5)                                                              |
| <i>Setting</i>                           |                                                                                                                                                          |                                                                            |
| 14. Setting of data collection           | Where was the data collected? e.g. home, clinic, workplace                                                                                               | 5                                                                          |
| 15. Presence of non-participants         | Was anyone else present besides the participants and researchers?                                                                                        | No                                                                         |
| 16. Description of sample                | What are the important characteristics of the sample? e.g. demographic data, date                                                                        | 5                                                                          |
| <i>Data collection</i>                   |                                                                                                                                                          |                                                                            |
| 17. Interview guide                      | Were questions, prompts, guides provided by the authors? Was it pilot tested?                                                                            | 5                                                                          |
| 18. Repeat interviews                    | Were repeat inter views carried out? If yes, how many?                                                                                                   | Two phases of study so all described methods were conducted twice (page 5) |
| 19. Audio/visual recording               | Did the research use audio or visual recording to collect the data?                                                                                      | 5                                                                          |
| 20. Field notes                          | Were field notes made during and/or after the inter view or focus group?                                                                                 | 5                                                                          |
| 21. Duration                             | What was the duration of the inter views or focus group?                                                                                                 | 5                                                                          |
| 22. Data saturation                      | Was data saturation discussed?                                                                                                                           | Saturation not relevant to this process evaluation                         |

|                                        |                                                                                                                                 |                    |
|----------------------------------------|---------------------------------------------------------------------------------------------------------------------------------|--------------------|
| 23. Transcripts returned               | Were transcripts returned to participants for comment and/or correction?                                                        | No                 |
| <b>Domain 3: analysis and findings</b> |                                                                                                                                 |                    |
| <i>Data analysis</i>                   |                                                                                                                                 |                    |
| 24. Number of data coders              | How many data coders coded the data?                                                                                            | 6                  |
| 25. Description of the coding tree     | Did authors provide a description of the coding tree?                                                                           | No                 |
| 26. Derivation of themes               | Were themes identified in advance or derived from the data?                                                                     | Inductive (page 6) |
| 27. Software                           | What software, if applicable, was used to manage the data?                                                                      | No                 |
| 28. Participant checking               | Did participants provide feedback on the findings?                                                                              | No                 |
| <i>Reporting</i>                       |                                                                                                                                 |                    |
| 29. Quotations presented               | Were participant quotations presented to illustrate the themes/findings? Was each quotation identified? e.g. participant number | 8-10               |
| 30. Data and findings consistent       | Was there consistency between the data presented and the findings?                                                              | 7-10               |
| 31. Clarity of major themes            | Were major themes clearly presented in the findings?                                                                            | 7-10               |
| 32. Clarity of minor themes            | Is there a description of diverse cases or discussion of minor themes?                                                          | 7-10               |
